# Supplementary material
Source: publisher figshare collection journal article supplement (https://acs.figshare.com/ndownloader/files/3950635)
Supplement: Supplementary file 1 [file 3950635]

## Supporting Informations

# Terminal Aryl Alkenes and Alkynes as Arylcarboxy Surrogates Towards *o*-Benzoylation of 2-Phenylpyridine Catalyzed by Copper

Saroj Kumar Rout,<sup>‡</sup> Srimanta Guin,<sup>‡</sup> Anupal Gogoi, Ganesh Majji, and Bhisma K. Patel\*

<sup>‡</sup>These authors contributed equally

Department of Chemistry, Indian Institute of Technology Guwahati

Email: patel@iitg.ernet.in

### List of Contents

|                                                    |           |
|----------------------------------------------------|-----------|
| 1. General information                             | S1        |
| 2. General procedure and mechanistic investigation | S2 – S4   |
| 3. Spectral data of all compounds                  | S5 – S17  |
| 4. Spectra of all compounds                        | S18 – S65 |

### General information:

All the reagents were commercial grade and purified according to the established procedures. Organic extracts were dried over anhydrous sodium sulphate. Solvents were removed in a rotary evaporator under reduced pressure. Silica gel (60–120 mesh size) was used for the column chromatography. Reactions were monitored by TLC on silica gel 60 F<sub>254</sub> (0.25 mm). NMR spectra were recorded in CDCl<sub>3</sub> with tetramethylsilane as the internal standard for <sup>1</sup>H NMR (400 MHz) CDCl<sub>3</sub> solvent as the internal standard for <sup>13</sup>C NMR (100 MHz). Mass spectra were recorded using WATERS MS system, Q-tof premier and data analyzed using Mass Lynx 4.1. IR spectra were recorded in KBr or neat on a Nicolet Impact 410 spectrophotometer.

**General Procedure for the Synthesis of 2-(Pyridin-2-yl)phenylbenzoate (**1a**):**

An oven-dried flask was charged with 2-phenylpyridine (**1**) (78 mg, 0.5 mmol), styrene (**a**) (105 mg, 1 mmol), Cu(OAc)<sub>2</sub> (18 mg, 0.1 mmol), TBHP in decane (5–6 M) (500  $\mu$ L, 5 mmol) and solvent chlorobenzene (1 mL). The flask was fitted to a condenser and the resultant reaction mixture was stirred in a preheated oil bath at 120 °C for 12 h. After stipulated time, the reaction mixture was cooled down to room temperature and diluted with ethyl acetate (10 mL). The reaction mixture was filtered through a celite bed and washed with an additional amount of ethyl acetate (2 x 10 mL). The combined organic layer was subsequently washed with 5% solution of sodium bicarbonate solution (2 x 5 mL) followed by water (2 x 5 mL). The ethyl acetate layer was dried over anhydrous Na<sub>2</sub>SO<sub>4</sub> and the volatiles were removed in vacuo. The residue was purified over a column of silica gel and eluted with (9:1, hexane / ethyl acetate) to give 2-(pyridin-2-yl)phenylbenzoate (**1a**) (97 mg, 71% yield).

**General procedure for the synthesis of 2-(Pyridin-2-yl)phenyl 3-methylbenzoate (**1b'**):**

An oven-dried flask was charged with 2-phenylpyridine (**1**) (78 mg, 0.5 mmol), 3-ethynyltoluene (**b'**) (116 mg, 1 mmol), Cu(OAc)<sub>2</sub> (18 mg, 0.1 mmol) and TBHP in decane (5–6 M) (500  $\mu$ L, 5 mmol). The flask was fitted to a condenser and the resultant reaction mixture was stirred in a preheated oil bath at 120 °C for 12 h. After stipulated time, the reaction mixture was cooled down to room temperature and diluted with ethyl acetate (10 mL). The reaction mixture filtered through a celite bed using ethyl acetate as the eluent (20 mL). The reaction mixture was filtered through a celite bed and washed with an additional amount of ethyl acetate (2 x 10 mL). The combined organic layer was subsequently washed with 5% solution of sodium bicarbonate solution (2 x 5 mL) followed by water (2 x 5 mL). The ethyl acetate layer was dried over anhydrous Na<sub>2</sub>SO<sub>4</sub> and the volatiles were removed in

vacuo. The residue was purified over a column of silica gel and eluted with (9:1, hexane / ethyl acetate) to give 2-(pyridin-2-yl)phenyl 3-methylbenzoate (**1b'**) (99 mg, 69% yield).

**Determine the extrusion of CO:** For the detection of extrusion of carbon monoxide, a strip containing  $\text{PdCl}_2$  and PMA (phosphomolybdic) was hanged from the neck of the reaction flask as shown in the figure below. The initial yellow colour of the strip before the reaction (Figure S1) turned pale blue after 2 hrs of the reaction progress (Figure S2). This colour change confirms the extrusion of CO from the reaction. The same detection technique was performed independently with phenylglyoxal and similar blue colouration was observed (within 10 minutes) with the formation of benzaldehyde (**D**).<sup>1</sup>

1. (a) Feigl, F.; Anger V. *Spot Tests in Inorganic Analysis 6<sup>th</sup> editions*; Elsevier, pp. 169.  
(b) Wang, L.; Ren, X.; Yu, J.; Jiang, Y.; Cheng, J. *J. Org. Chem.* **2013**, 78, 12076.

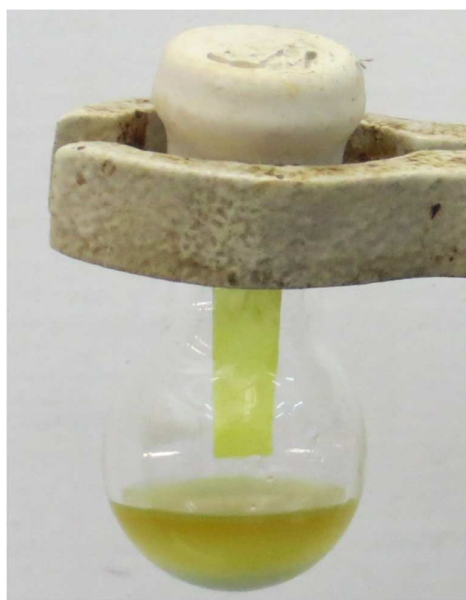

**Fig S1**

$\text{PdCl}_2$ -PMA test strip before reaction

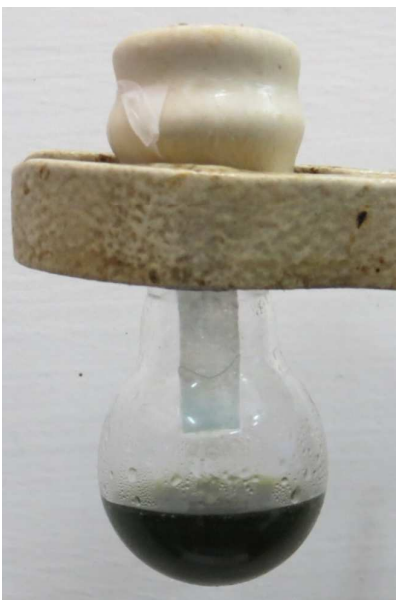

**Fig S2**

$\text{PdCl}_2$ -PMA test strip after reaction

**Mechanistic investigation in the presence of radical scavenger TEMPO:** An oven-dried reaction vessel was charged with 2-phenylpyridine (**1**) (78 mg, 0.5 mmol), styrene (**a**) (105 mg, 1 mmol), Cu(OAc)<sub>2</sub> (18 mg, 0.2 mmol), TBHP in decane (5–6 M) (500  $\mu$ L, 5 mmol) TEMPO (0.156 g, 1 mmol) and solvent chlorobenzene (1 mL). The flask was fitted to a condenser and the resultant reaction mixture was stirred in a preheated oil bath at 120 °C for 12 h. The reaction after 12 h afforded the benzoyl-TEMPO adduct **2,2,6,6-tetramethylpiperidin-1-yl benzoate (H)** (42% yield) and traces (<5%) of the desired product (**1a**) was observed. This experiment supports the formation of benzoyl radical (**D'**) in the medium from phenylglyoxal induced radically by Cu/TBHP.

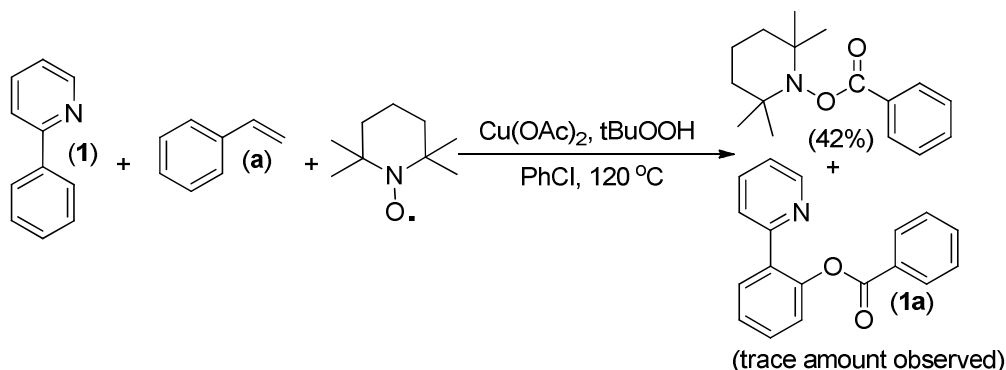

**Scheme S1:** Trapping the intermediate with TEMPO



## Spectral Data

**2-(Pyridin-2-yl)phenylbenzoate (1a):**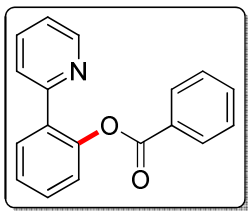

$^1\text{H}$  NMR (400 MHz,  $\text{CDCl}_3$ ):  $\delta$  (ppm) 7.15–7.18 (m, 1H), 7.29–7.32 (m, 1H), 7.39–7.51 (m, 4H), 7.55–7.65 (m, 3H), 7.78–7.79 (m, 1H), 8.07–8.10 (m, 2H), 8.59–8.60 (m, 1H);  $^{13}\text{C}$  NMR (100 MHz,  $\text{CDCl}_3$ ):  $\delta$  (ppm) 123.3, 123.5, 123.9, 126.7, 128.7, 129.7, 130.0, 130.4, 131.1, 133.5, 133.7, 136.4, 148.5, 149.8, 155.8, 165.4; IR (KBr): 3062, 2927, 2858, 1737, 1592, 1458, 1260, 1190, 1067, 1020, 842, 751, 749, 707  $\text{cm}^{-1}$ ; HRMS (ESI): calcd. for  $\text{C}_{18}\text{H}_{13}\text{NO}_2$  ( $\text{MH}^+$ ) 276.1019; found 276.1014.

**2-(Pyridin-2-yl)phenyl 2-methylbenzoate (1b):**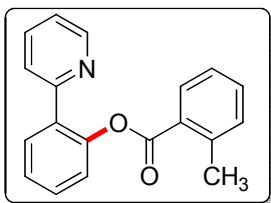

$^1\text{H}$  NMR (400 MHz,  $\text{CDCl}_3$ ):  $\delta$  (ppm) 2.53 (s, 3H), 7.17–7.20 (m, 1H), 7.25–7.30 (m, 3H), 7.38–7.51 (m, 3H), 7.54–7.57 (m, 1H), 7.60–7.67 (m, 1H), 7.74–7.77 (m, 1H), 7.98–8.02 (m, 1H), 8.61–8.63 (m, 1H);  $^{13}\text{C}$  NMR (100 MHz,  $\text{CDCl}_3$ ):  $\delta$  (ppm) 21.8, 122.3, 123.6, 123.9, 125.9, 126.5, 128.7, 129.9, 131.0, 131.2, 131.9, 132.7, 133.6, 136.4, 141.3, 148.5, 149.6, 155.9, 165.8; IR (KBr): 3062, 2962, 2928, 2856, 1743, 1585, 1492, 1467, 1426, 1289, 1250, 1197, 1155, 1115, 1040, 1021, 884, 794, 736, 693, 616  $\text{cm}^{-1}$ ; HRMS (ESI): calcd. for  $\text{C}_{19}\text{H}_{15}\text{NO}_2$  ( $\text{MH}^+$ ) 290.1176; found 290.1171.

**2-(Pyridin-2-yl)phenyl 4-methylbenzoate (1c):**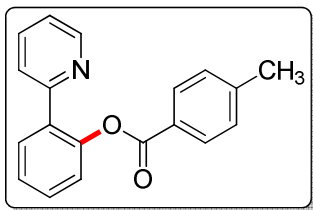

$^1\text{H}$  NMR (400 MHz,  $\text{CDCl}_3$ ):  $\delta$  (ppm) 2.42 (s, 3H), 7.14–7.17 (m, 1H), 7.25 (d, 2H,  $J = 8.0$  Hz), 7.29–7.31 (m, 1H), 7.38–7.42 (m, 1H), 7.46–7.49 (m, 1H), 7.55–7.57 (m, 1H), 7.59–7.63 (m, 1H), 7.77–7.79 (m, 1H), 7.97 (d, 2H,  $J = 8.0$  Hz), 8.59–8.61 (m, 1H);  $^{13}\text{C}$  NMR (100 MHz,  $\text{CDCl}_3$ ):  $\delta$  (ppm) 21.9, 122.3, 123.5, 123.9, 126.5, 126.9, 129.4, 129.9, 130.4, 131.1, 133.5, 136.3, 144.5, 148.5, 149.8, 155.7, 165.4; IR (KBr): 3043, 2999, 2919, 2846, 1732, 1608, 1582, 1491, 1455, 1424, 1265, 1193, 1174, 1114, 1066, 1014, 834, 744,  $685, 610\text{ cm}^{-1}$ ; HRMS (ESI): calcd. for  $\text{C}_{19}\text{H}_{15}\text{NO}_2$  ( $\text{MH}^+$ ) 290.1176; found 290.1173.

**2-(Pyridin-2-yl)phenyl 2,4,6-trimethylbenzoate (1d):**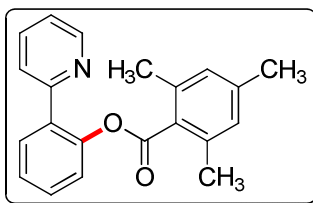

$^1\text{H}$  NMR (400 MHz,  $\text{CDCl}_3$ ):  $\delta$  (ppm) 2.20 (s, 6H), 2.27 (s, 3H), 6.83 (s, 2H), 7.20–7.24 (m, 1H), 7.32–7.34 (m, 1H), 7.37–7.41 (m, 1H), 7.47–7.51 (m, 1H), 7.56 (d, 1H,  $J = 7.6$  Hz), 7.63–7.67 (m, 1H), 7.70–7.75 (m, 1H), 8.66 (d, 1H,  $J = 5.2$  Hz);  $^{13}\text{C}$  NMR (100 MHz,  $\text{CDCl}_3$ ):  $\delta$  (ppm) 20.0, 21.3, 122.4, 123.2, 124.6, 126.6, 128.9, 129.9, 131.3, 134.2, 136.1, 136.4, 140.1, 148.4, 149.8, 156.0, 168.4; IR (KBr): 2924, 2856, 1742, 1611, 1585, 1493, 1463, 1425, 1379, 1243, 1187, 1163, 1051, 1022, 852, 752,  $613\text{ cm}^{-1}$ ; HRMS (ESI): calcd. for  $\text{C}_{21}\text{H}_{19}\text{NO}_2$  ( $\text{MH}^+$ ) 318.1489; found 318.1481.

**2-(Pyridin-2-yl)phenyl 4-methoxybenzoate (1e):**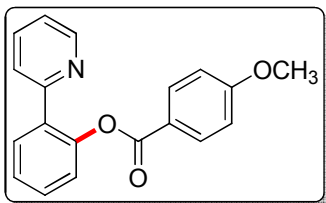

$^1\text{H}$  NMR (400 MHz,  $\text{CDCl}_3$ ):  $\delta$  (ppm) 3.90 (s, 3H), 6.92 (d, 2H,  $J = 8.8$  Hz), 7.14–7.17 (m, 1H), 7.28–7.30 (m, 1H), 7.36–7.40 (m, 1H), 7.44–7.49 (m, 1H), 7.53–7.56 (m, 1H), 7.59–7.62 (m, 1H), 7.77–7.79 (m, 1H), 8.03 (d, 2H,  $J = 8.8$  Hz), 8.60–8.62 (m, 1H);  $^{13}\text{C}$  NMR (100 MHz,  $\text{CDCl}_3$ ):  $\delta$  (ppm) 55.5, 113.9, 121.8, 122.2, 123.5, 123.8, 126.3, 129.8, 130.9, 132.4, 133.4, 136.2, 148.5, 149.7, 155.6, 163.9, 164.9; IR (KBr): 3061, 3007, 2964, 2953, 2840, 1731, 1606, 1583, 1511, 1463, 1423, 1253, 1195, 1166, 1114, 1067, 1025, 848, 793, 753, 692, 636  $\text{cm}^{-1}$ ; HRMS (ESI): calcd. for  $\text{C}_{19}\text{H}_{15}\text{NO}_3$  ( $\text{MH}^+$ ) 306.1125; found 306.1133

**2-(Pyridin-2-yl)phenyl 4-chlorobenzoate (1f):**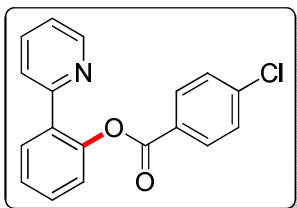

$^1\text{H}$  NMR (400 MHz,  $\text{CDCl}_3$ )  $\delta$  (ppm) 7.13–7.17 (m, 1H), 7.28–7.30 (m, 1H), 7.38–7.43 (m, 3H), 7.45–7.53 (m, 3H), 7.60–7.65 (m, 1H), 8.00 (d, 2H,  $J = 8.8$  Hz), 8.55–8.56 (m, 1H);  $^{13}\text{C}$  NMR (100 MHz,  $\text{CDCl}_3$ )  $\delta$  (ppm) 122.4, 123.4, 123.8, 126.7, 128.1, 129.0, 129.9, 131.1, 131.7, 133.4, 136.4, 140.1, 148.3, 149.7, 155.7, 164.5; IR (KBr) 2924, 2853, 1738, 1593, 1478, 1429, 1400, 1263, 1191, 1090, 1073, 1014, 966, 795, 752, 627  $\text{cm}^{-1}$ ; HRMS (ESI): calcd. for  $\text{C}_{18}\text{H}_{12}\text{ClNO}_2$  ( $\text{MH}^+$ ) 310.0629; found 310.0635.

**2-(Pyridin-2-yl)phenyl 4-bromobenzoate (1g):**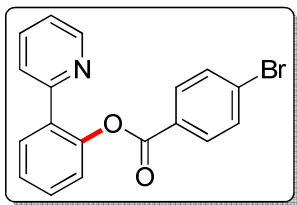

$^1\text{H}$  NMR (400 MHz,  $\text{CDCl}_3$ ):  $\delta$  (ppm) 7.15–7.18 (m, 1H), 7.29 (d, 1H,  $J = 8.4$  Hz), 7.39–7.43 (m, 1H), 7.46–7.53 (m, 2H), 7.58–7.66 (m, 3H), 7.74–7.76 (m, 1H), 7.93 (d, 2H,  $J = 8.8$  Hz), 8.56 (d, 1H,  $J = 8.8$  Hz);  $^{13}\text{C}$  NMR (100 MHz,  $\text{CDCl}_3$ ):  $\delta$  (ppm) 122.4, 123.4, 123.8, 126.7, 128.6, 128.7, 128.9, 130.3, 131.1, 131.8, 132.0, 136.4, 148.3, 149.7, 155.7, 164.7; IR (KBr): 3052, 2925, 2850, 1733, 1587, 1492, 1482, 1465, 1450, 1423, 1395, 1261, 1186, 1166, 1068, 1058, 1023, 1008, 849, 795, 761, 749  $\text{cm}^{-1}$ ; HRMS (ESI): calcd. for  $\text{C}_{18}\text{H}_{12}\text{BrNO}_2$  ( $\text{MH}^+$ ) 354.0124; found 354.0117.

**2-(Pyridin-2-yl)phenyl 2-naphthoate (1h):**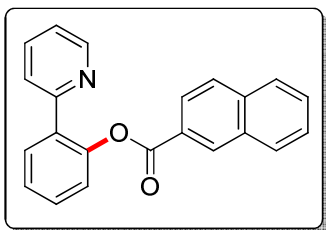

$^1\text{H}$  NMR (400 MHz,  $\text{CDCl}_3$ ):  $\delta$  (ppm) 7.09–7.13 (m, 1H), 7.34 (d, 1H,  $J = 8.0$  Hz), 7.38–7.44 (m, 1H), 7.47–7.61 (m, 5H), 7.77–7.79 (m, 1H), 7.87 (d, 1H,  $J = 8.4$  Hz), 7.93 (d, 2H,  $J = 8.8$  Hz), 8.05–8.07 (m, 1H), 8.56 (d, 1H,  $J = 8.8$  Hz), 8.66 (s, 1H);  $^{13}\text{C}$  NMR (100 MHz,  $\text{CDCl}_3$ ):  $\delta$  (ppm) 122.3, 123.5, 123.9, 125.7, 126.6, 126.8, 126.9, 127.9, 128.5, 128.8, 129.7, 129.9, 131.1, 132.1, 132.7, 133.6, 135.9, 136.4, 148.6, 149.8, 155.8, 165.5; IR (KBr): 3057, 2923, 2850, 1733, 1629, 1585, 1492, 1463, 1425, 1281, 1222, 1187, 1127, 1063, 1024, 951, 867, 774, 750  $\text{cm}^{-1}$ ; HRMS (ESI): calcd. for  $\text{C}_{22}\text{H}_{15}\text{NO}_2$  ( $\text{MH}^+$ ) 326.1176; found 326.1167.

**5-Methyl-2-(pyridine-2-yl)phenyl benzoate (2a):**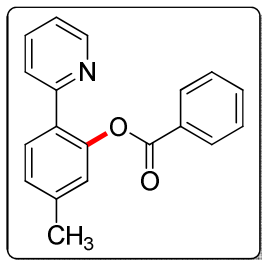

$^1\text{H}$  NMR (400 MHz,  $\text{CDCl}_3$ ):  $\delta$  (ppm) 2.43 (s, 3H), 7.11–7.14 (m, 2H), 7.19–7.22 (m, 1H), 7.46 (t, 2H,  $J = 8.0$  Hz), 7.52–7.61 (m, 3H), 7.67 (d, 1H,  $J = 7.6$  Hz), 8.07–8.09 (m, 2H), 8.58 (d, 1H,  $J = 4.0$  Hz);  $^{13}\text{C}$  NMR (100 MHz,  $\text{CDCl}_3$ ):  $\delta$  (ppm) 29.8, 122.2, 123.3, 123.85, 123.93, 127.5, 128.7, 129.7, 130.3, 130.9, 133.6, 136.5, 140.4, 148.3, 149.7, 155.7, 165.4; IR (KBr): 2924, 2853, 1735, 1623, 1596, 1467, 1382, 1259, 1175, 1155, 1131, 1079, 1062, 1024, 780, 740, 708  $\text{cm}^{-1}$ ; HRMS (ESI): calcd. for  $\text{C}_{19}\text{H}_{15}\text{NO}_2$  ( $\text{MH}^+$ ) 290.1176; found 290.1172.

**5-Methyl-2-(pyridine-2-yl)phenyl 2-methylbenzoate (2b):**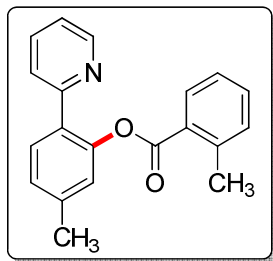

$^1\text{H}$  NMR (400 MHz,  $\text{CDCl}_3$ ):  $\delta$  (ppm) 2.43 (s, 3H), 2.53 (s, 3H), 7.09 (s, 1H), 7.11–7.15 (m, 1H), 7.18–7.25 (m, 3H), 7.40 (t, 1H,  $J = 7.6$  Hz), 7.51–7.53 (m, 1H), 7.58–7.66 (m, 2H), 8.01 (d, 1H,  $J = 7.6$  Hz), 8.57–8.59 (m, 1H);  $^{13}\text{C}$  NMR (100 MHz,  $\text{CDCl}_3$ ):  $\delta$  (ppm) 21.4, 21.8, 122.1, 123.8, 124.0, 125.9, 127.4, 128.9, 130.8, 131.2, 131.9, 132.6, 136.3, 140.4, 141.3, 148.3, 149.7, 156.0, 166.0; IR (KBr) 3062, 2961, 2926, 1737, 1623, 1586, 1573, 1466, 1431,

1288, 1245, 1151, 1135, 1045, 893, 782, 736, 691  $\text{cm}^{-1}$ ; HRMS (ESI): calcd. for  $\text{C}_{20}\text{H}_{17}\text{NO}_2$  ( $\text{MH}^+$ ) 304.1332; found 304.1335.

**5-Methyl-2-(pyridine-2-yl)phenyl 4-methylbenzoate (2c):**

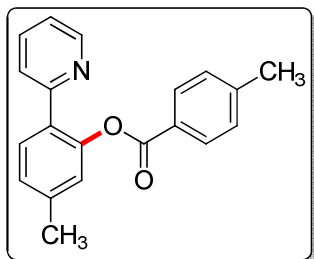

$^1\text{H}$  NMR (400 MHz,  $\text{CDCl}_3$ ):  $\delta$  (ppm) 2.41 (s, 3H), 2.42 (s, 3H), 7.09–7.12 (m, 2H), 7.18–7.20 (m, 1H), 7.23–7.25 (m, 2H), 7.52–7.59 (m, 2H), 7.68 (d, 1H,  $J = 7.6$  Hz), 7.97 (d, 2H,  $J = 8.4$  Hz), 8.57–8.58 (m, 1H);  $^{13}\text{C}$  NMR (100 MHz,  $\text{CDCl}_3$ ):  $\delta$  (ppm) 21.3, 21.9, 122.0, 123.8, 123.9, 126.9, 127.4, 129.4, 130.4, 130.5, 130.8, 136.3, 140.3, 144.4, 148.3, 149.7, 155.7, 165.5; IR (KBr) 3056, 2953, 2922, 2852, 1735, 1612, 1586, 1465, 1431, 1258, 1177, 1152, 1130, 1070, 1019, 892, 781, 746, 687  $\text{cm}^{-1}$ ; HRMS (ESI): calcd. for  $\text{C}_{20}\text{H}_{17}\text{NO}_2$  ( $\text{MH}^+$ ) 304.1332; found 304.1338.

**5-Methyl-2-(pyridine-2-yl)phenyl 2,4,6-trimethylbenzoate (2d):**

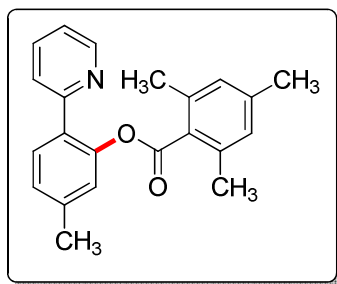

$^1\text{H}$  NMR (600 MHz,  $\text{CDCl}_3$ ):  $\delta$  (ppm) 2.20 (s, 6H), 2.27 (s, 3H), 2.46 (s, 3H), 6.84 (s, 2H), 7.13 (s, 1H), 7.19–7.21 (m, 2H), 7.54 (d, 1H,  $J = 7.6$  Hz), 7.61–7.64 (m, 2H), 8.66 (d, 1H,  $J = 5.6$  Hz);  $^{13}\text{C}$  NMR (150 MHz,  $\text{CDCl}_3$ ):  $\delta$  (ppm) 19.9, 21.1, 24.7, 122.1, 123.4, 124.4, 127.3, 128.3, 128.7, 129.6, 130.9, 135.9, 136.3, 139.9, 140.3, 147.9, 149.4, 155.7, 168.3; IR (KBr)

2953, 2923, 2854, 1742, 1611, 1587, 1466, 1431, 1379, 1253, 1243, 1163, 1127, 1094, 1052, 954, 825, 784, 746  $\text{cm}^{-1}$ ; HRMS (ESI): calcd. for  $\text{C}_{22}\text{H}_{21}\text{NO}_2$  ( $\text{MH}^+$ ) 332.1645; found 332.1649.

**5-Methyl-2-(pyridine-2-yl)phenyl 4-methoxybenzoate (2e):**

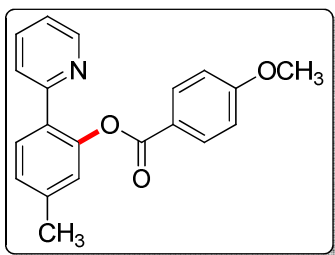

$^1\text{H}$  NMR (400 MHz,  $\text{CDCl}_3$ ):  $\delta$  (ppm) 2.41 (s, 3H), 3.85 (s, 3H), 6.89–6.92 (m, 2H), 7.07–7.12 (m, 2H), 7.16–7.18 (m, 1H), 7.49–7.52 (m, 1H), 7.55–7.59 (m, 1H), 7.65 (d, 1H,  $J$  = 8.0 Hz), 8.00–8.03 (m, 2H), 8.56–8.58 (m, 1H);  $^{13}\text{C}$  NMR (100 MHz,  $\text{CDCl}_3$ ):  $\delta$  (ppm) 21.4, 55.7, 113.9, 122.0, 122.1, 123.9, 124.0, 127.3, 130.6, 130.9, 132.5, 136.3, 140.4, 148.4, 149.7, 155.8, 163.9, 165.2; IR (KBr) 2961, 2924, 2845, 1737, 1606, 1510, 1465, 1432, 1254, 1167, 1130, 1069, 1026, 846, 782  $\text{cm}^{-1}$ ; HRMS (ESI): calcd. for  $\text{C}_{20}\text{H}_{17}\text{NO}_3$  ( $\text{MH}^+$ ) 320.1281; found 320.1284.

**5-Methyl-2-(pyridin-2-yl)phenyl 4-chlorobenzoate (2f):**

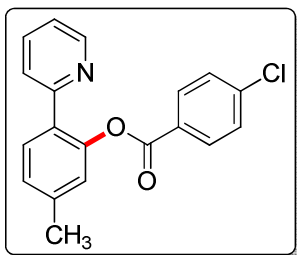

$^1\text{H}$  NMR (400 MHz,  $\text{CDCl}_3$ ):  $\delta$  (ppm) 2.43 (s, 3H), 7.10–7.15 (m, 2H), 7.20–7.22 (m, 1H), 7.43 (d, 2H,  $J$  = 8.8 Hz), 7.50 (d, 1H,  $J$  = 8.0 Hz), 7.59–7.66 (m, 2H), 8.01 (d, 2H,  $J$  = 8.8 Hz), 8.55 (d, 1H,  $J$  = 4.0 Hz);  $^{13}\text{C}$  NMR (100 MHz,  $\text{CDCl}_3$ ):  $\delta$  (ppm) 21.4, 122.2, 123.6,

123.9, 127.6, 128.2, 129.0, 130.4, 130.8, 131.7, 136.4, 140.1, 140.5, 148.1, 149.7, 155.8, 164.7; IR (KBr): 3057, 2923, 2847, 1739, 1620, 1590, 1507, 1487, 1465, 1431, 1400, 1258, 1227, 1172, 1152, 1131, 1090, 1071, 1013, 847, 826, 748, 750, 680  $\text{cm}^{-1}$ ; HRMS (ESI): calcd. for  $\text{C}_{19}\text{H}_{14}\text{ClNO}_2$  ( $\text{MH}^+$ ) 324.0786; found 324.0781.

**2-(Pyridin-2-yl)phenyl 3-methylbenzoate (1b<sup>+</sup>):**

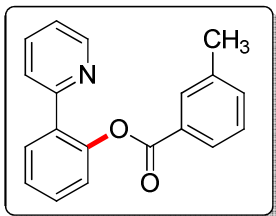

$^1\text{H}$  NMR (400 MHz,  $\text{CDCl}_3$ )  $\delta$  (ppm) 2.39 (s, 3H), 7.13–7.17 (m, 1H), 7.28–7.34 (m, 2H), 7.37–7.41 (m, 2H), 7.45–7.49 (m, 1H), 7.55 (d, 1H,  $J = 8.0$  Hz), 7.59–7.63 (m, 1H), 7.76–7.79 (m, 1H), 7.87 (d, 2H,  $J = 8.0$  Hz), 8.60 (d, 1H,  $J = 4.8$  Hz);  $^{13}\text{C}$  NMR (100 MHz,  $\text{CDCl}_3$ )  $\delta$  (ppm) 21.4, 122.3, 123.5, 123.9, 126.5, 127.5, 128.5, 129.5, 129.9, 130.9, 131.1, 133.5, 134.4, 136.3, 138.5, 148.5, 149.8, 155.7, 165.5; IR (KBr) 3051, 2917, 2853, 1734, 1635, 1587, 1462, 1425, 1274, 1182, 1083, 1064, 1024, 989, 902, 871, 751, 738  $\text{cm}^{-1}$ ; HRMS (ESI): calcd. for  $\text{C}_{19}\text{H}_{15}\text{NO}_2$  ( $\text{MH}^+$ ) 290.1176; found 290.1169.

**2-(Pyridin-2-yl)phenyl 4-(tert-butyl)benzoate (1c<sup>+</sup>):**

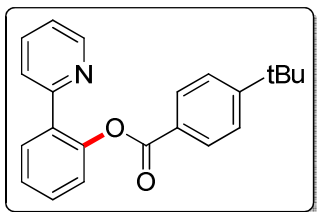

$^1\text{H}$  NMR (400 MHz,  $\text{CDCl}_3$ ):  $\delta$  (ppm) 1.34 (s, 9H), 7.14–7.18 (m, 1H), 7.28 (t, 1H,  $J = 7.6$  Hz), 7.37 (t, 1H,  $J = 7.6$  Hz), 7.44–7.49 (m, 3H), 7.57 (d, 1H,  $J = 8.0$  Hz), 7.60–7.65 (m, 1H), 7.78 (d, 1H,  $J = 7.6$  Hz), 8.01 (d, 2H,  $J = 8.8$  Hz), 8.62 (d, 1H,  $J = 8.0$  Hz);  $^{13}\text{C}$  NMR (100



MHz, CDCl<sub>3</sub>):  $\delta$  (ppm) 31.3, 35.3, 122.3, 123.5, 124.0, 125.7, 126.5, 126.8, 129.9, 130.3, 131.1, 133.5, 136.4, 148.5, 149.8, 155.7, 157.4, 165.3; IR (KBr): 3061, 2963, 2869, 1737, 1608, 1586, 1462, 1425, 1408, 1299, 1267, 1185, 1111, 1068, 1014, 853, 792, 769, 757, 748, 702 cm<sup>-1</sup>; HRMS (ESI): calcd. for C<sub>22</sub>H<sub>21</sub>NO<sub>2</sub> (MH<sup>+</sup>) 332.1645; found 332.1653.

**2-(Pyridin-2-yl)phenyl 3,5-dimethylbenzoate (1d<sup>+</sup>):**

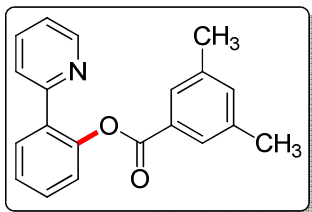

<sup>1</sup>H NMR (400 MHz, CDCl<sub>3</sub>):  $\delta$  (ppm) 2.33 (s, 6H), 7.13–7.16 (m, 1H), 7.20 (s, 1H), 7.25–7.29 (m, 1H), 7.35–7.39 (m, 1H), 7.43–7.47 (m, 1H), 7.54 (t, 2H, *J* = 8.0 Hz), 7.58–7.63 (m, 1H), 7.67 (s, 1H), 7.74–7.77 (m, 1H), 8.59–8.60 (m, 1H); <sup>13</sup>CNMR (100 MHz, CDCl<sub>3</sub>):  $\delta$  (ppm) 21.3, 122.3, 123.4, 123.9, 126.5, 128.0, 129.4, 129.9, 131.1, 133.5, 135.3, 136.3, 138.3, 148.5, 149.7, 155.7, 165.6; IR (KBr): 3060, 3008, 2920, 2854, 1740, 1608, 1585, 1492, 1465, 1425, 1381, 1312, 1186, 1098, 1058, 995, 946, 914, 868, 794, 751, 667 cm<sup>-1</sup>; HRMS (ESI): calcd. for C<sub>20</sub>H<sub>17</sub>NO<sub>2</sub> (MH<sup>+</sup>) 304.1332; found 304.1333.

**2-(Pyridin-2-yl)phenyl 3,4-dimethoxybenzoate (1e<sup>+</sup>):**

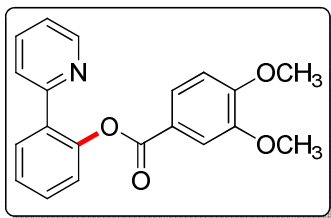

<sup>1</sup>H NMR (400 MHz, CDCl<sub>3</sub>)  $\delta$  (ppm) 3.89 (s, 3H), 3.95 (s, 3H), 6.90 (d, 1H, *J* = 8.8 Hz), 7.16–7.19 (m, 1H), 7.26–7.32 (m, 1H), 7.37–7.46 (m, 1H), 7.47–7.50 (m, 1H), 7.54–7.56 (m, 2H), 7.61–7.65 (m, 1H), 7.73–7.78 (m, 2H), 8.61–8.62 (m, 1H); <sup>13</sup>C NMR (100 MHz,

CDCl<sub>3</sub>)  $\delta$  (ppm) 56.2, 110.5, 112.6, 122.0, 122.3, 123.5, 123.9, 124.6, 126.5, 129.9, 131.1, 133.5, 136.4, 148.5, 148.9, 149.8, 153.7, 155.8, 165.1; IR (KBr) 2923, 2852, 1729, 1634, 1514, 1462, 1416, 1289, 1271, 1215, 1192, 1172, 1133, 1023, 793, 753 cm<sup>-1</sup>; HRMS (ESI): calcd. for C<sub>20</sub>H<sub>17</sub>NO<sub>4</sub> (MH<sup>+</sup>) 336.1230; found 336.1234.

**2-(Pyridin-2-yl)phenyl 1-naphthoate (1h<sup>+</sup>):**

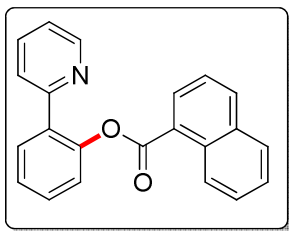

<sup>1</sup>H NMR (600 MHz, CDCl<sub>3</sub>):  $\delta$  (ppm) 7.14–7.15 (m, 1H), 7.37 (d, 1H,  $J$  = 7.8 Hz), 7.42–7.44 (m, 1H), 7.49–7.55 (m, 3H), 7.56–7.63 (m, 2H), 7.78–7.79 (m, 2H), 7.89 (d, 1H,  $J$  = 7.6 Hz), 8.05 (d, 1H,  $J$  = 7.8 Hz), 8.30 (d, 1H,  $J$  = 7.8 Hz), 8.58–8.59 (m, 1H), 8.86 (d, 1H,  $J$  = 8.4 Hz); <sup>13</sup>C NMR (150 MHz, CDCl<sub>3</sub>):  $\delta$  (ppm) 122.4, 123.7, 123.9, 124.7, 125.9, 126.2, 126.5, 126.7, 128.2, 128.7, 130.0, 131.1, 131.2, 131.8, 133.8, 134.0, 134.2, 136.5, 148.6, 149.8, 156.1, 165.9; IR (KBr): 3058, 2919, 2846, 1732, 1602, 1586, 1509, 1493, 1471, 1463, 1452, 1425, 1276, 1240, 1186, 1120, 1059, 982, 885, 813, 780, 659, cm<sup>-1</sup>; HRMS (ESI): calcd. for C<sub>22</sub>H<sub>15</sub>NO<sub>2</sub> (MH<sup>+</sup>) 326.1176; found 326.1179.

**5-Methyl-2-(pyridin-2-yl)phenyl 3-methylbenzoate (2b<sup>+</sup>):**

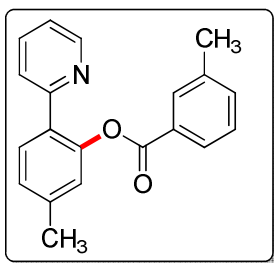

$^1\text{H}$  NMR (400 MHz,  $\text{CDCl}_3$ ):  $\delta$  (ppm) 2.37 (s, 3H), 2.41 (s, 3H), 7.08–7.12 (m, 2H), 7.17–7.19 (m, 1H), 7.30 (t, 1H,  $J = 7.6$  Hz), 7.38 (d, 1H,  $J = 7.6$  Hz), 7.51–7.59 (m, 2H), 7.66 (d, 1H,  $J = 8.0$  Hz), 7.86–7.89 (m, 2H), 8.57 (d, 1H,  $J = 4.0$  Hz);  $^{13}\text{C}$  NMR (100 MHz,  $\text{CDCl}_3$ ):  $\delta$  (ppm) 21.4, 29.8, 122.4, 123.4, 123.9, 126.5, 127.5, 128.5, 129.5, 129.9, 130.9, 131.1, 133.4, 134.4, 136.5, 138.5, 148.5, 149.6, 155.6, 165.5; IR (KBr): 3061, 2924, 2854, 1736, 1591, 1466, 1428, 1274, 1184, 1084, 1063, 1000, 903, 837, 751  $\text{cm}^{-1}$ ; HRMS (ESI): calcd. for  $\text{C}_{20}\text{H}_{17}\text{NO}_2$  ( $\text{MH}^+$ ) 304.1332; found 304.1326.

**5-Methyl-2-(pyridine-2-yl)phenyl 4-(*tert*-butyl)benzoate (2c')**

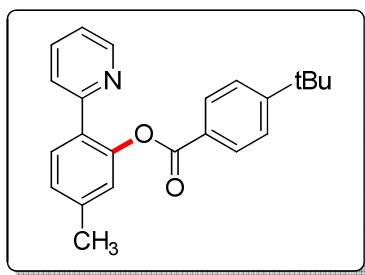

$^1\text{H}$  NMR (600 MHz,  $\text{CDCl}_3$ ):  $\delta$  (ppm) 1.35 (s, 9H), 2.43 (s, 3H), 7.09–7.15 (m, 2H), 7.19 (t, 1H,  $J = 7.2$  Hz), 7.44–7.47 (m, 2H), 7.54 (t, 1H,  $J = 7.2$  Hz), 7.58–7.61 (m, 1H), 7.67–7.69 (m, 1H), 8.01 (d, 1H,  $J = 8.4$  Hz), 8.08 (d, 1H,  $J = 7.8$  Hz), 8.57–8.61 (m, 1H);  $^{13}\text{C}$  NMR (150 MHz,  $\text{CDCl}_3$ ):  $\delta$  (ppm) 21.4, 31.3, 35.4, 122.1, 123.9, 125.7, 126.9, 127.4, 128.7, 129.8, 130.3, 133.6, 136.3, 140.4, 148.4, 149.7, 155.8, 157.4, 165.5; IR (KBr): 3058, 2963, 2868, 1736, 1608, 1587, 1465, 1431, 1408, 1259, 1187, 1152, 1131, 1110, 1064, 1025, 892, 853, 784, 748, 705  $\text{cm}^{-1}$ ; HRMS (ESI): calcd. for  $\text{C}_{23}\text{H}_{23}\text{NO}_2$  ( $\text{MH}^+$ ) 346.1802; found 346.1809.

**5-Methyl-2-(pyridine-2-yl)phenyl 3,5dimethylbenzoate (2d'):**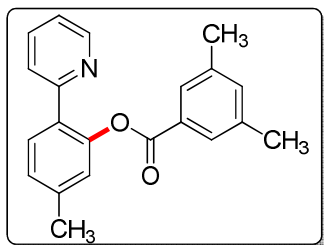

$^1\text{H}$  NMR (400 MHz,  $\text{CDCl}_3$ ):  $\delta$  (ppm) 2.35 (s, 6H), 2.42 (s, 3H), 7.09–7.15 (m, 2H), 7.18–7.21 (m, 2H), 7.52–7.61 (m, 2H), 7.66–7.70 (m, 3H), 8.58–8.60 (m, 1H);  $^{13}\text{C}$  NMR (100 MHz,  $\text{CDCl}_3$ ):  $\delta$  (ppm) 21.3, 21.4, 122.1, 123.8, 123.9, 127.4, 128.1, 129.5, 130.5, 130.8, 135.4, 136.4, 138.3, 140.4, 148.3, 149.7, 155.8, 165.8; IR (KBr): 2953, 2921, 2855, 1736, 1611, 1589, 1465, 1432, 1309, 1194, 1154, 1130, 1097, 999, 947, 779, 753  $\text{cm}^{-1}$ ; HRMS (ESI): calcd. for  $\text{C}_{21}\text{H}_{19}\text{NO}_2$  ( $\text{MH}^+$ ) 318.1489; found 318.1484.

**5-Methyl-2-(pyridine-2-yl)phenyl 4-bromobenzoate (2g'):**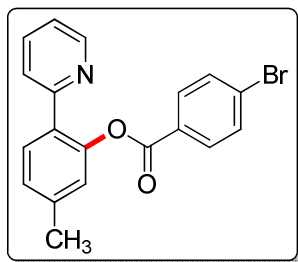

$^1\text{H}$  NMR (400 MHz,  $\text{CDCl}_3$ ):  $\delta$  (ppm) 2.42 (s, 3H), 7.08–7.13 (m, 2H), 7.19 (d, 1H,  $J = 8.0$  Hz), 7.47 (d, 1H,  $J = 8.0$  Hz), 7.57 (d, 3H,  $J = 8.8$  Hz), 7.63 (d, 1H,  $J = 8.0$  Hz), 7.91 (d, 2H,  $J = 8.8$  Hz), 8.51–8.52 (m, 1H);  $^{13}\text{C}$  NMR (100 MHz,  $\text{CDCl}_3$ ):  $\delta$  (ppm) 21.4, 122.2, 123.6, 123.9, 127.6, 128.7, 128.8, 130.4, 130.8, 131.8, 132.0, 136.4, 140.5, 148.1, 149.7, 155.7, 164.8; IR (KBr): 2955, 2922, 2853, 1737, 1621, 1589, 1465, 1431, 1397, 1258, 1173, 1152, 1131, 1071, 1027, 1010, 783, 747, 678  $\text{cm}^{-1}$ ; HRMS (ESI): calcd. for  $\text{C}_{19}\text{H}_{14}\text{BrNO}_2$  ( $\text{MH}^+$ ) 368.0281; found 368.0275.

**2,2,6,6-Tetramethylpiperidin-1-yl benzoate (H):**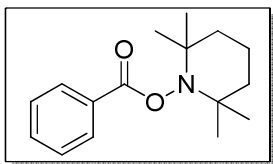

White solid;  $^1\text{H}$  NMR (600 MHz,  $\text{CDCl}_3$ ):  $\delta$  (ppm) 1.12 (s, 6H), 1.26 (s, 6H), 1.42–1.45 (m, 1H), 1.55–1.58 (m, 2H), 1.66–1.78 (m, 3H), 7.43 (t, 2H,  $J = 7.8$  Hz), 7.54 (t, 1H,  $J = 7.8$  Hz), 8.03–8.06 (m, 2H);  $^{13}\text{C}$  NMR (150 MHz,  $\text{CDCl}_3$ ):  $\delta$  (ppm) 17.2, 21.0, 32.1, 39.2, 60.6, 128.6, 129.7, 129.9, 133.0, 166.6; IR (KBr): 3007, 2973, 2940, 1741, 1641, 1452, 1365, 1253, 1238, 1083, 1062, 1026, 913, 718  $\text{cm}^{-1}$ ; HRMS (ESI): calcd. for  $\text{C}_{16}\text{H}_{23}\text{NO}_2$  ( $\text{MH}^+$ ) 262.1802; found 262.1801.

2-(Pyridin-2-yl)phenyl benzoate (1a):  $^1\text{H}$  NMR (400 MHz,  $\text{CDCl}_3$ )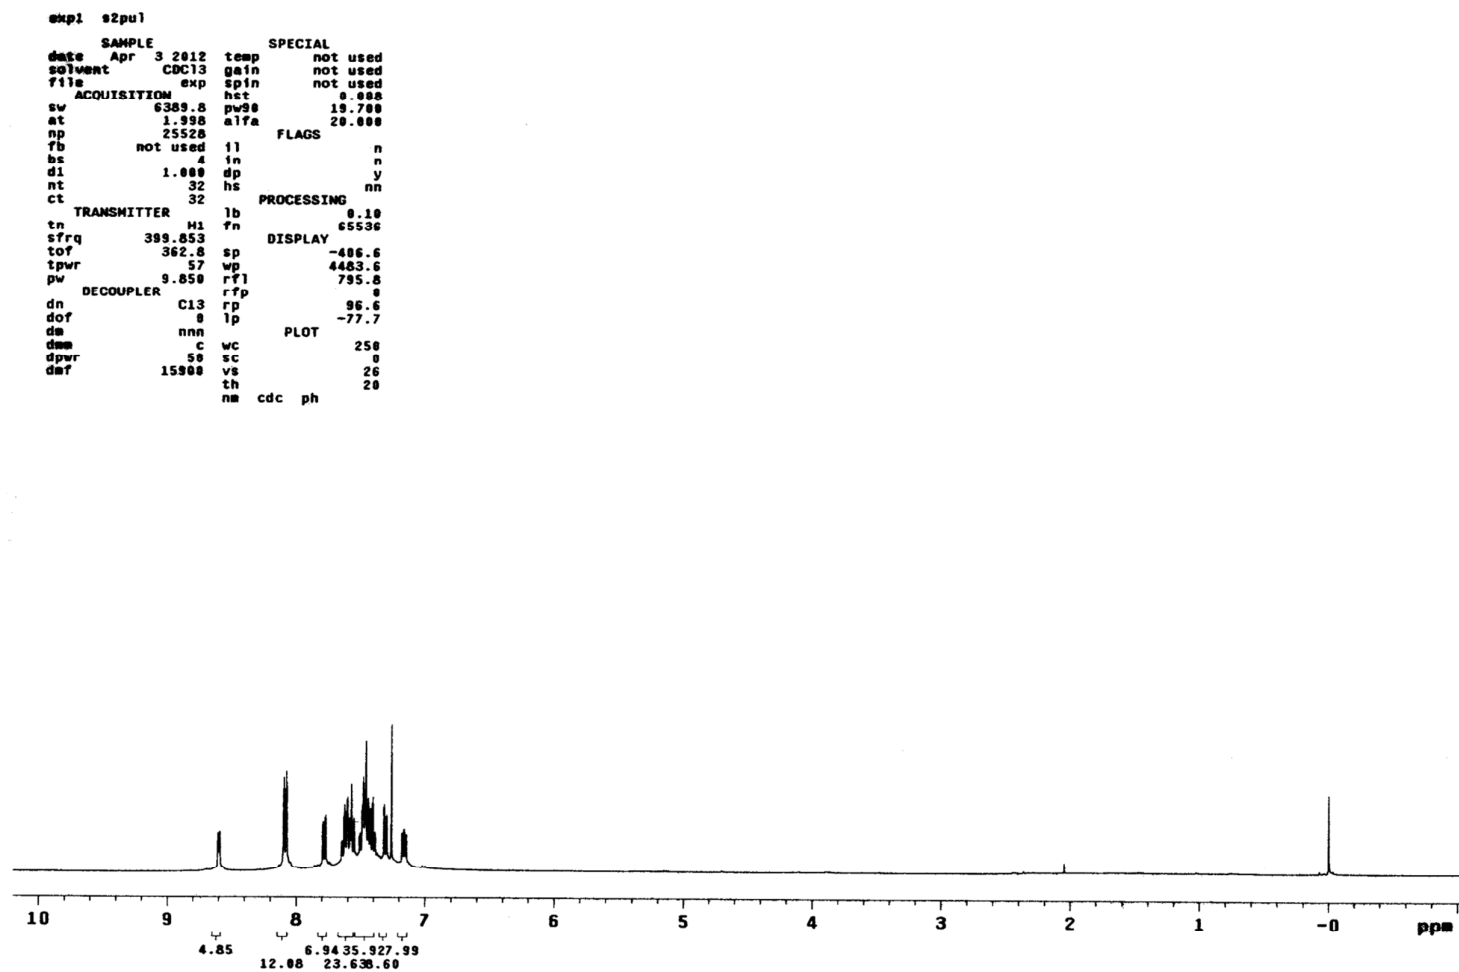

2-(Pyridin-2-yl)phenyl benzoate (1a):  $^{13}\text{C}$  NMR (100 MHz,  $\text{CDCl}_3$ )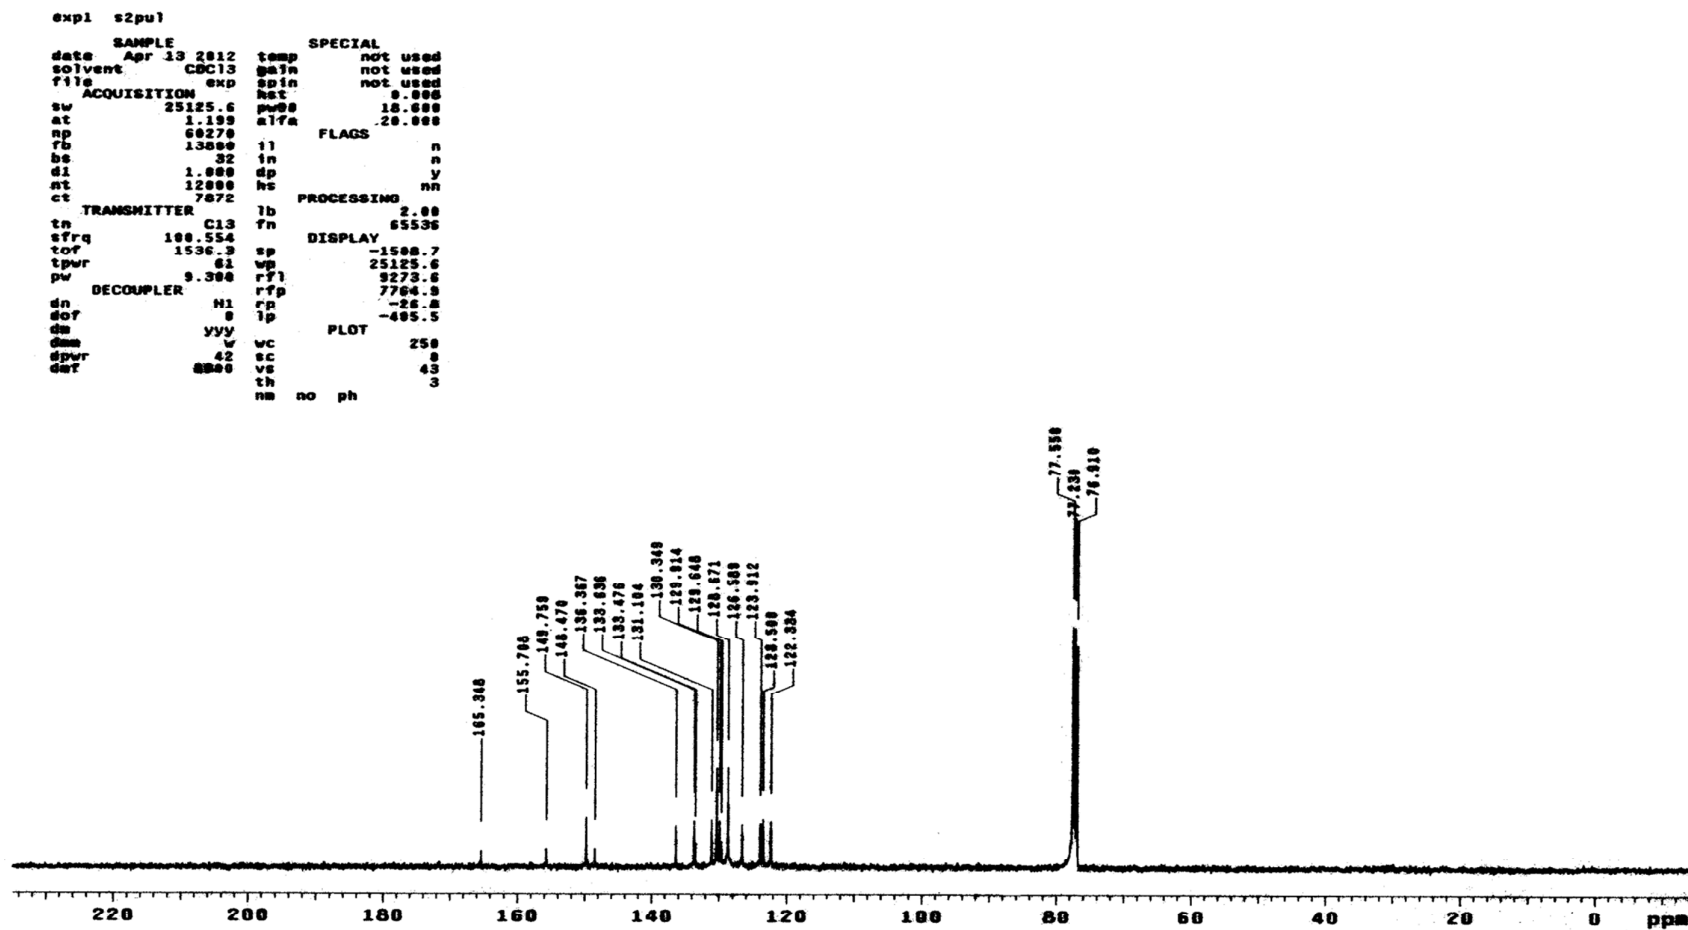

**2-(Pyridin-2-yl)phenyl 2-methylbenzoate (1b):** <sup>1</sup>H NMR (400 MHz, CDCl<sub>3</sub>)

```

exml  s2pu1

SAMPLE                                     SPECIAL
date  Apr 25 2012                       temp  not used
solvent  CDC13                          gain  not used
file      exp                           spin  not used
ACQUISITION                             hst    0.088
sw  6389.8                             pu90   19.700
at  1.998                             alfa   20.000
np  25528                               FLAGS
fb  not used                          fl      n
bs  4                                   tn      n
di  1.000                             dp      y
nt  32                                  hs      n
ct  32                               PROCESSING
TRANSMITTER                             lb      0.10
tn  H1                                fn      65536
sfreq  399.853                       DISPLAY
tof  362.8                             sp      -56.9
pw  57                                wp      4458.4
puwr  9.850                           rfl     798.0
DECOUPLER                             rfp     0
dn  C13                               lp      102.0
dof  0                                 lp      -87.3
dm  nnn                               PLOT
dmm  c                                wc      250.0
dpuwr  50                             sc      0
dmf  15900                           vs      65
                                         th      5
                                         nm  cdc  ph

```

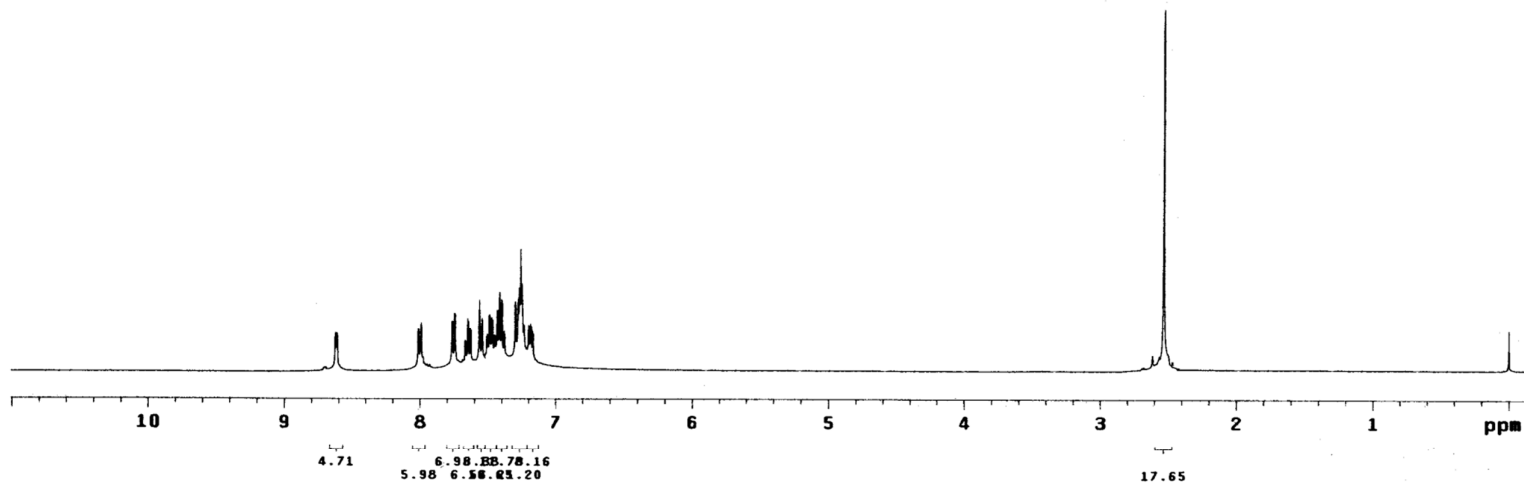



2-(Pyridin-2-yl)phenyl 2-methylbenzoate (1b):  $^{13}\text{C}$  NMR (100 MHz,  $\text{CDCl}_3$ )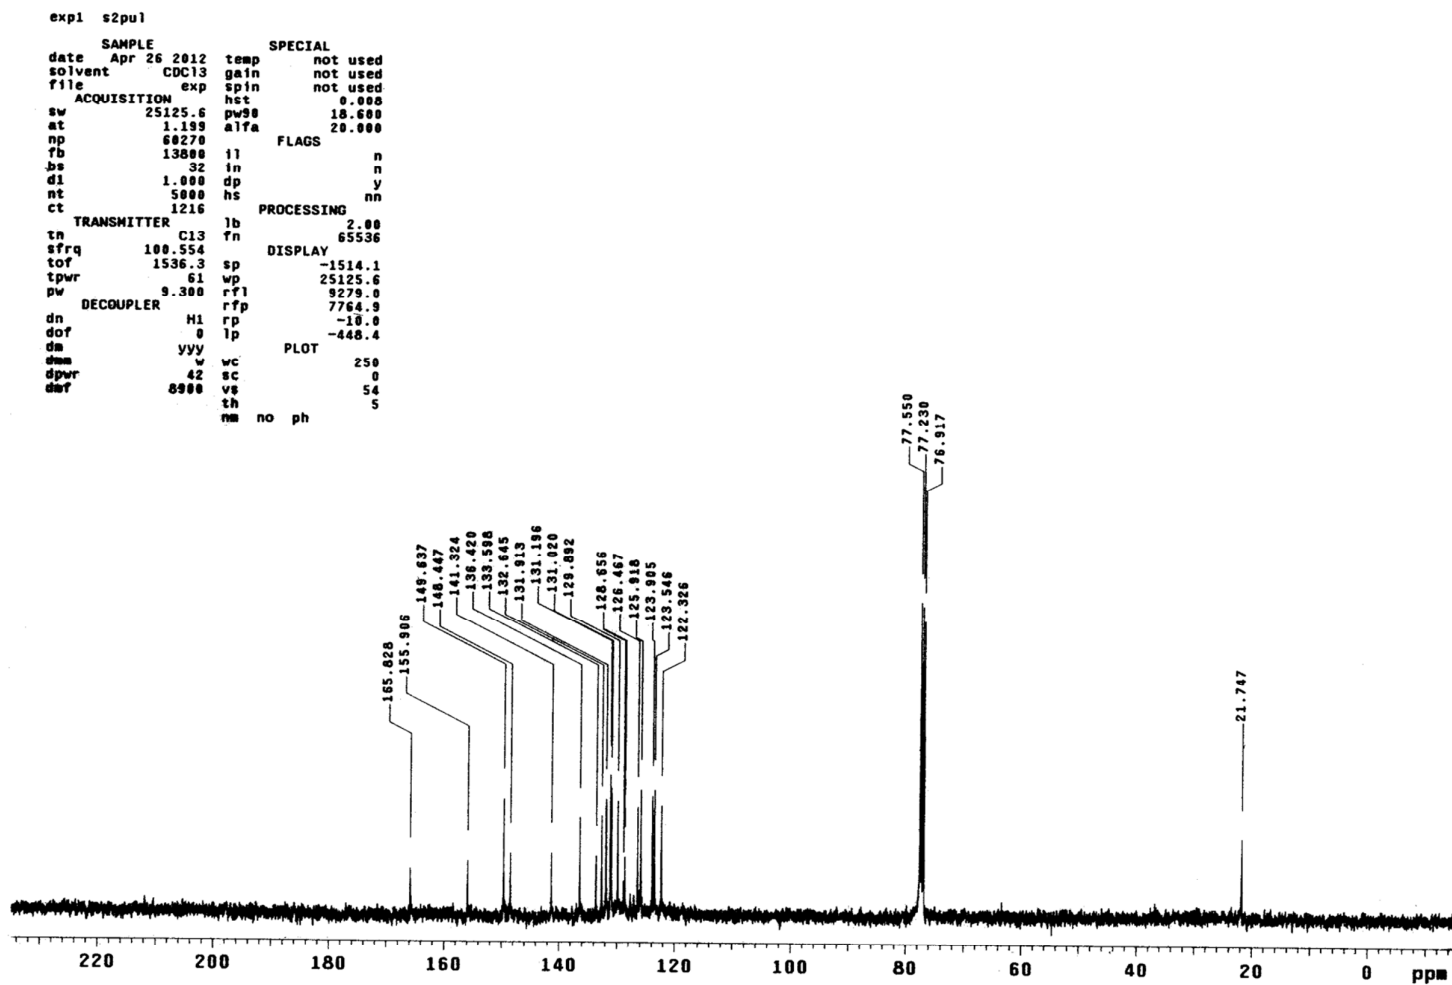

2-(Pyridin-2-yl)phenyl 4-methylbenzoate (1c):  $^1\text{H}$  NMR (400 MHz,  $\text{CDCl}_3$ )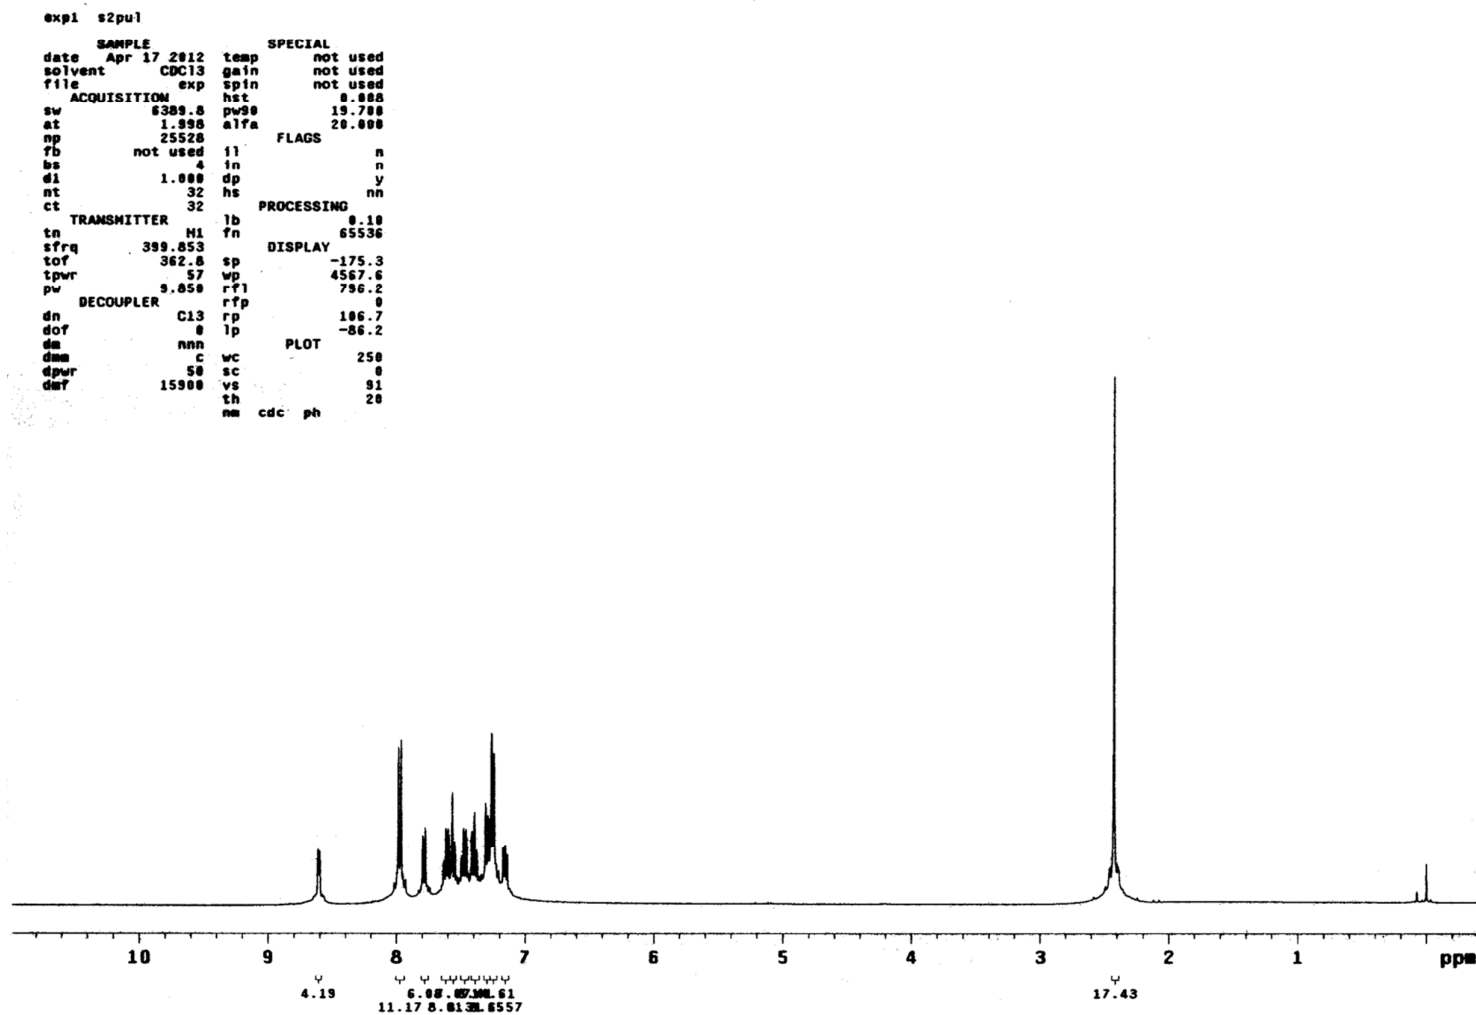

2-(Pyridin-2-yl)phenyl 4-methylbenzoate (1c):  $^{13}\text{C}$  NMR (100 MHz,  $\text{CDCl}_3$ )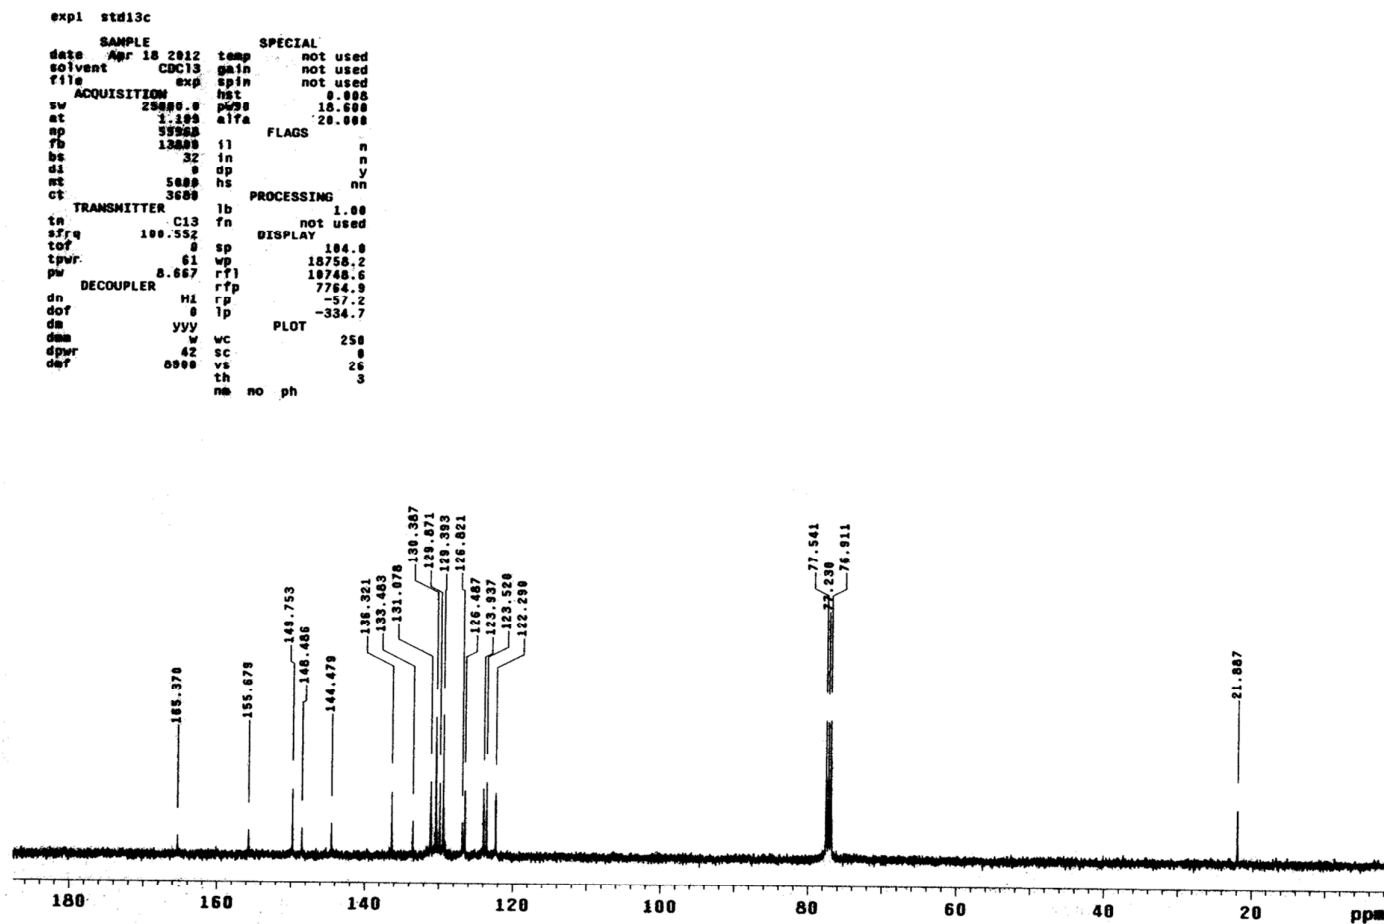

2-(Pyridin-2-yl)phenyl 2,4,6-trimethylbenzoate (1d):  $^1\text{H}$  NMR (400 MHz,  $\text{CDCl}_3$ )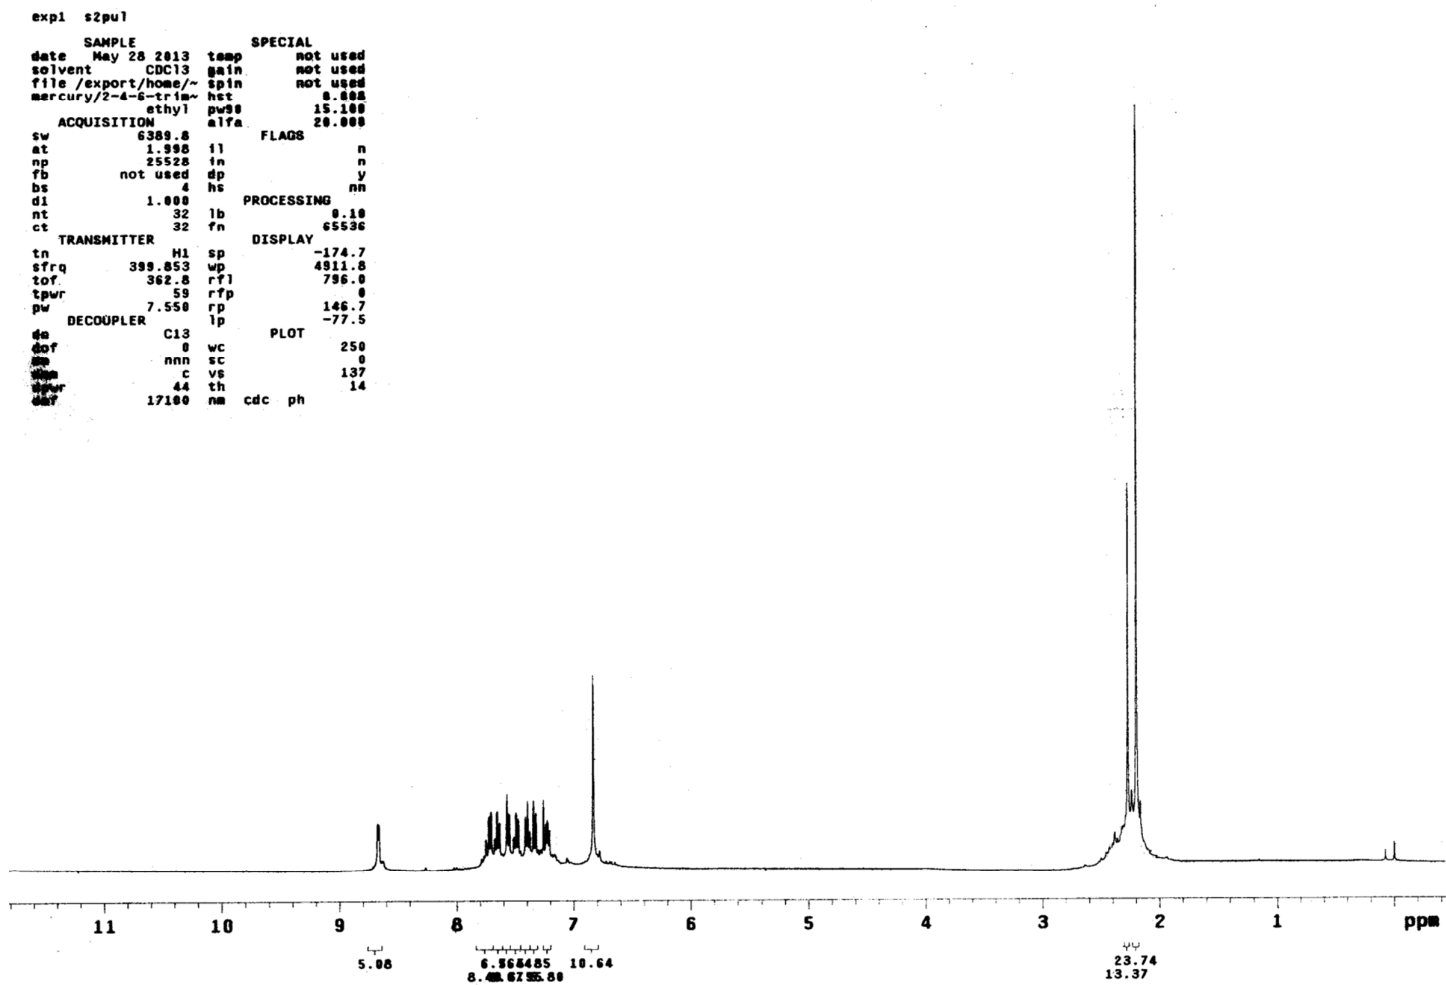

2-(Pyridin-2-yl)phenyl 2,4,6-trimethylbenzoate (1d):  $^{13}\text{C}$  NMR (100 MHz,  $\text{CDCl}_3$ )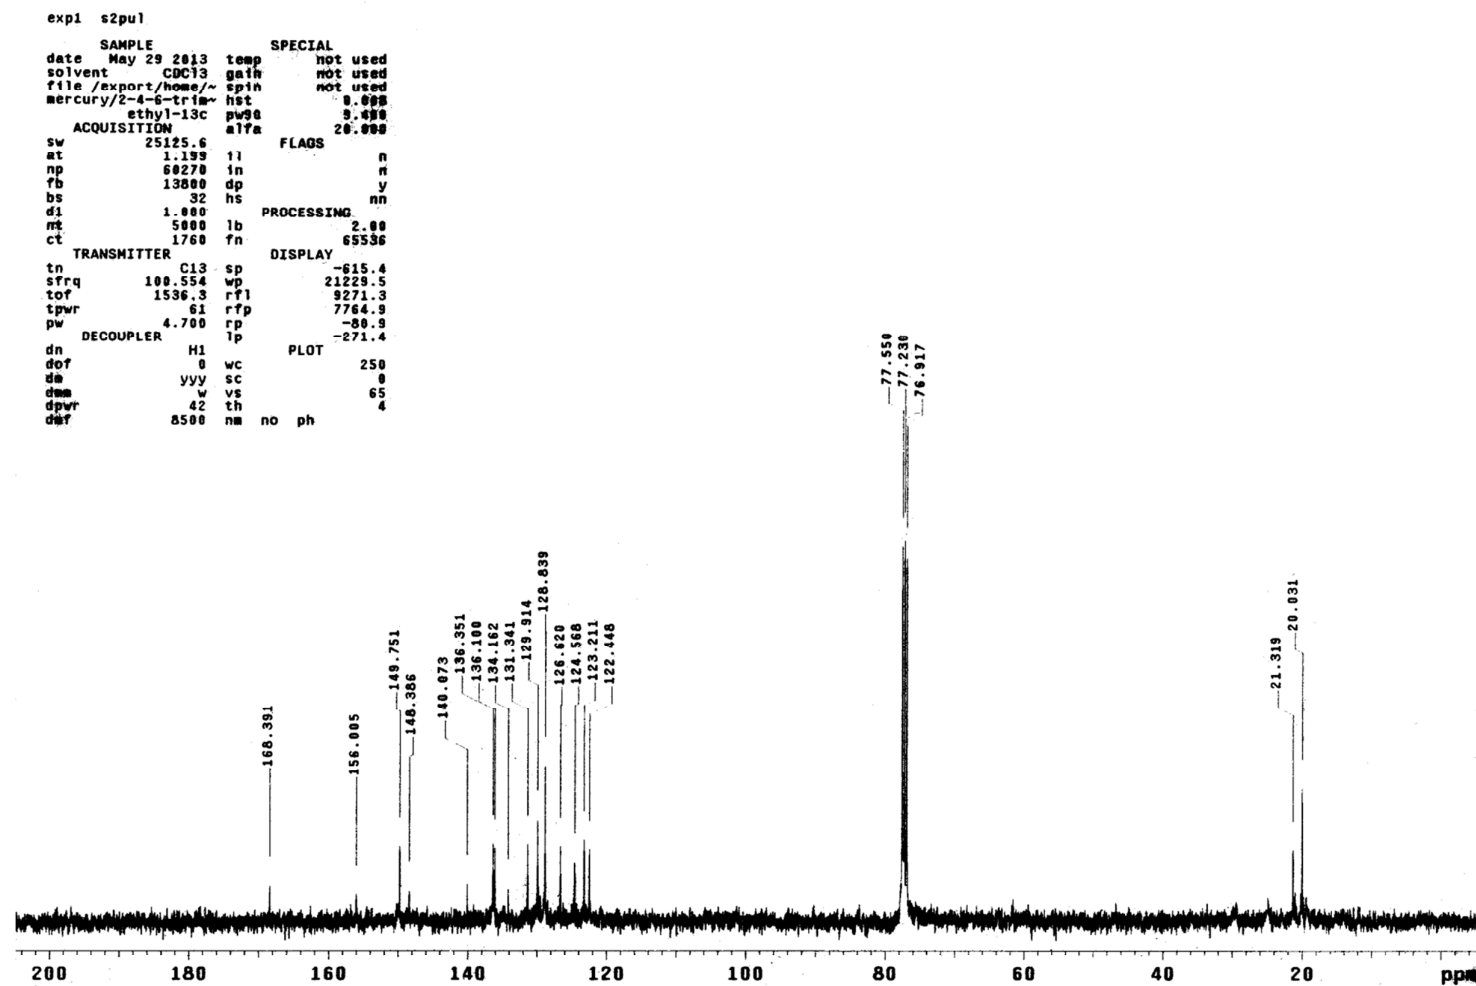

2-(Pyridin-2-yl)phenyl 4-methoxybenzoate (1e):  $^1\text{H}$  NMR (400 MHz,  $\text{CDCl}_3$ )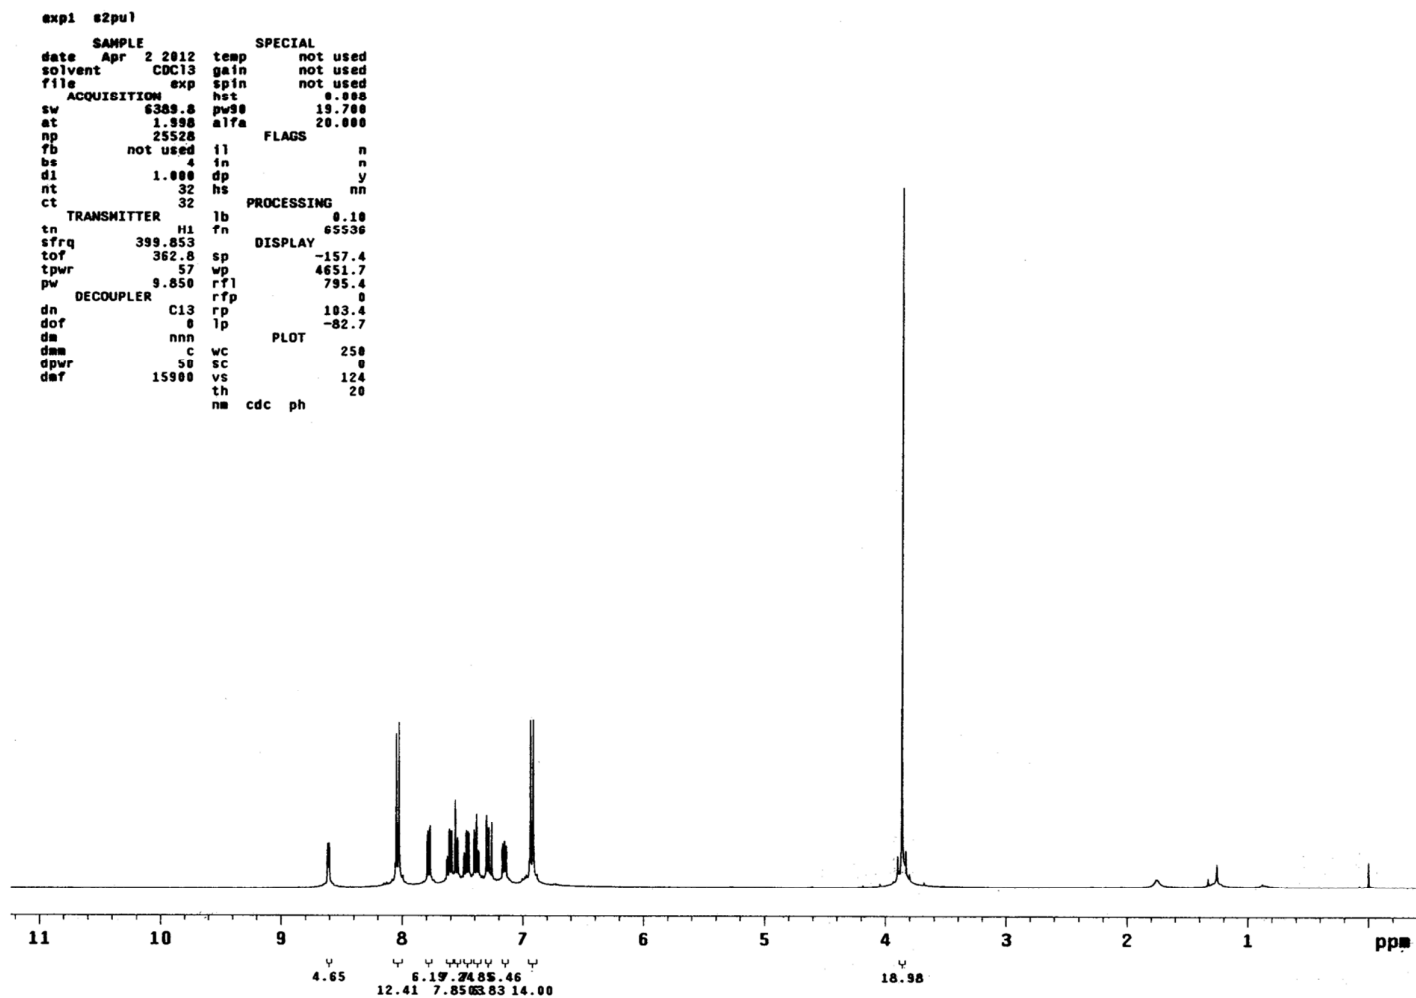

2-(Pyridin-2-yl)phenyl 4-methoxybenzoate (1e):  $^{13}\text{C}$  NMR (100 MHz,  $\text{CDCl}_3$ )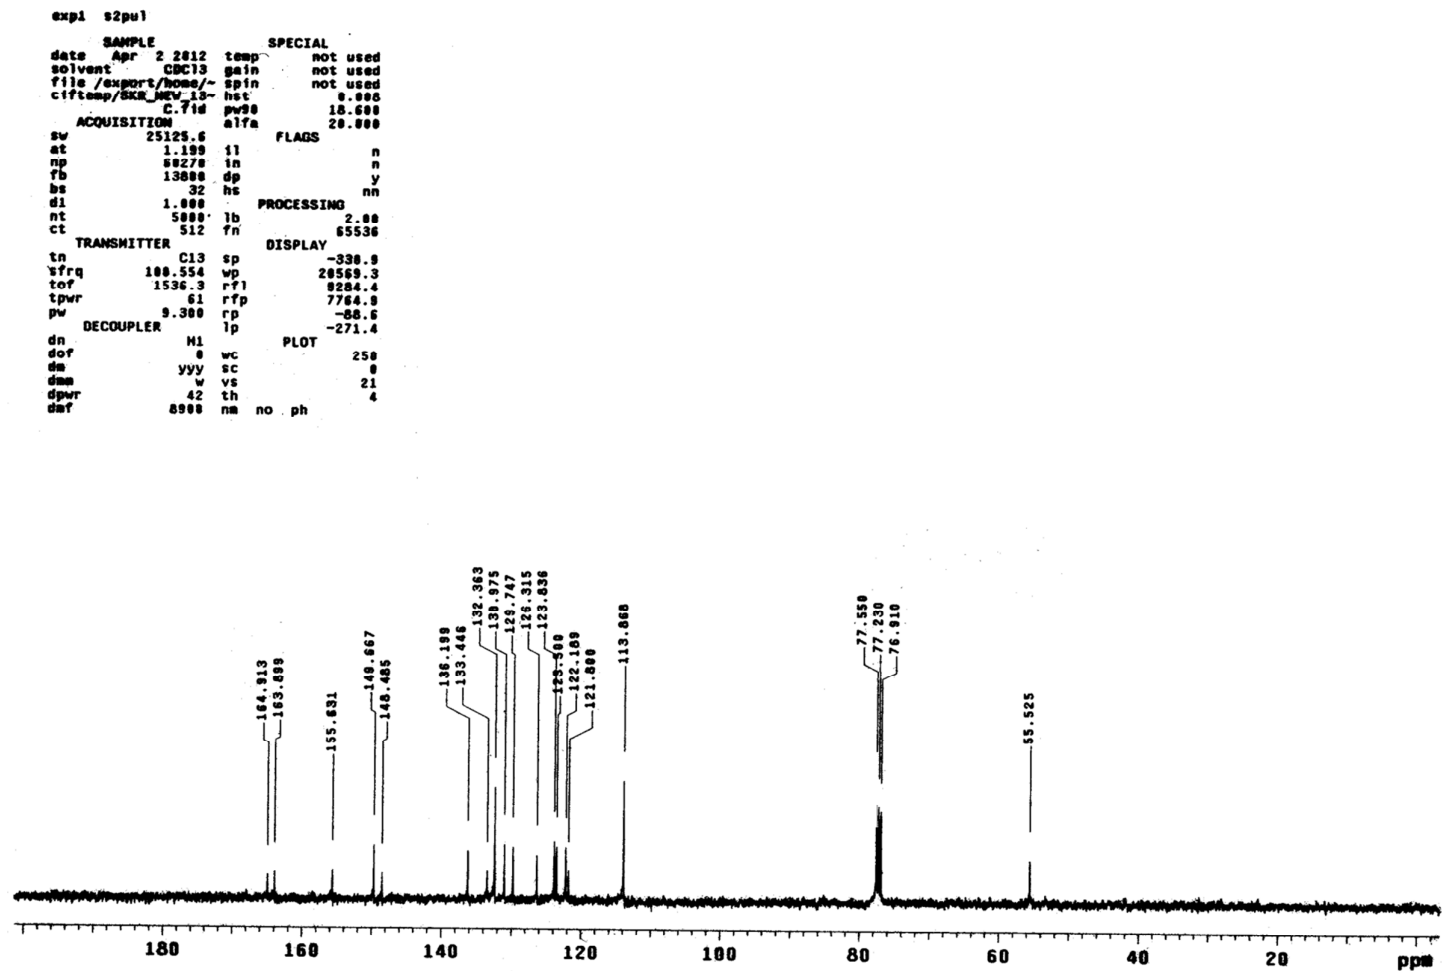

2-(Pyridin-2-yl)phenyl 4-chlorobenzoate (1f):  $^1\text{H}$  NMR (400 MHz,  $\text{CDCl}_3$ )

```

exp1 s2pu1
SAMPLE
date Jun 26 2013 temp not used
solvent CDCl3 gain not used
file exp spin not used
ACQUISITION exp hst 0.000
sw 6389.8 pw90 15.100
at 1.998 alfa 20.000
np 25528
fb not used il n
bs 4 in n
dl 1.000 dp y
nt 32 hs nn
ct 32
TRANSMITTER lb 0.10
tn H1 Tn 65536
sfrq 399.853
tof 362.8 sp -165.6
tpwr 59 wp 4660.1
pw 7.550 rfl 795.2
DECOUPLER C13 rfp 0
dn 144.8
dof 0 lp -68.4
da nnn PLOT
dnn c wc 250
dpwr 44 sc 0
daf 17100 vs 40
nm cdc ph th 20

```

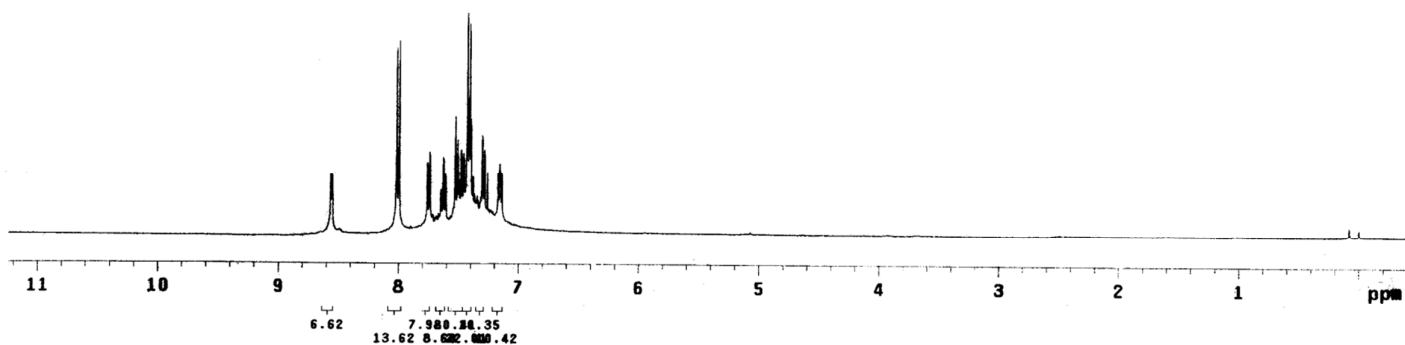



2-(Pyridin-2-yl)phenyl 4-chlorobenzoate (1f):  $^{13}\text{C}$  NMR (100 MHz,  $\text{CDCl}_3$ )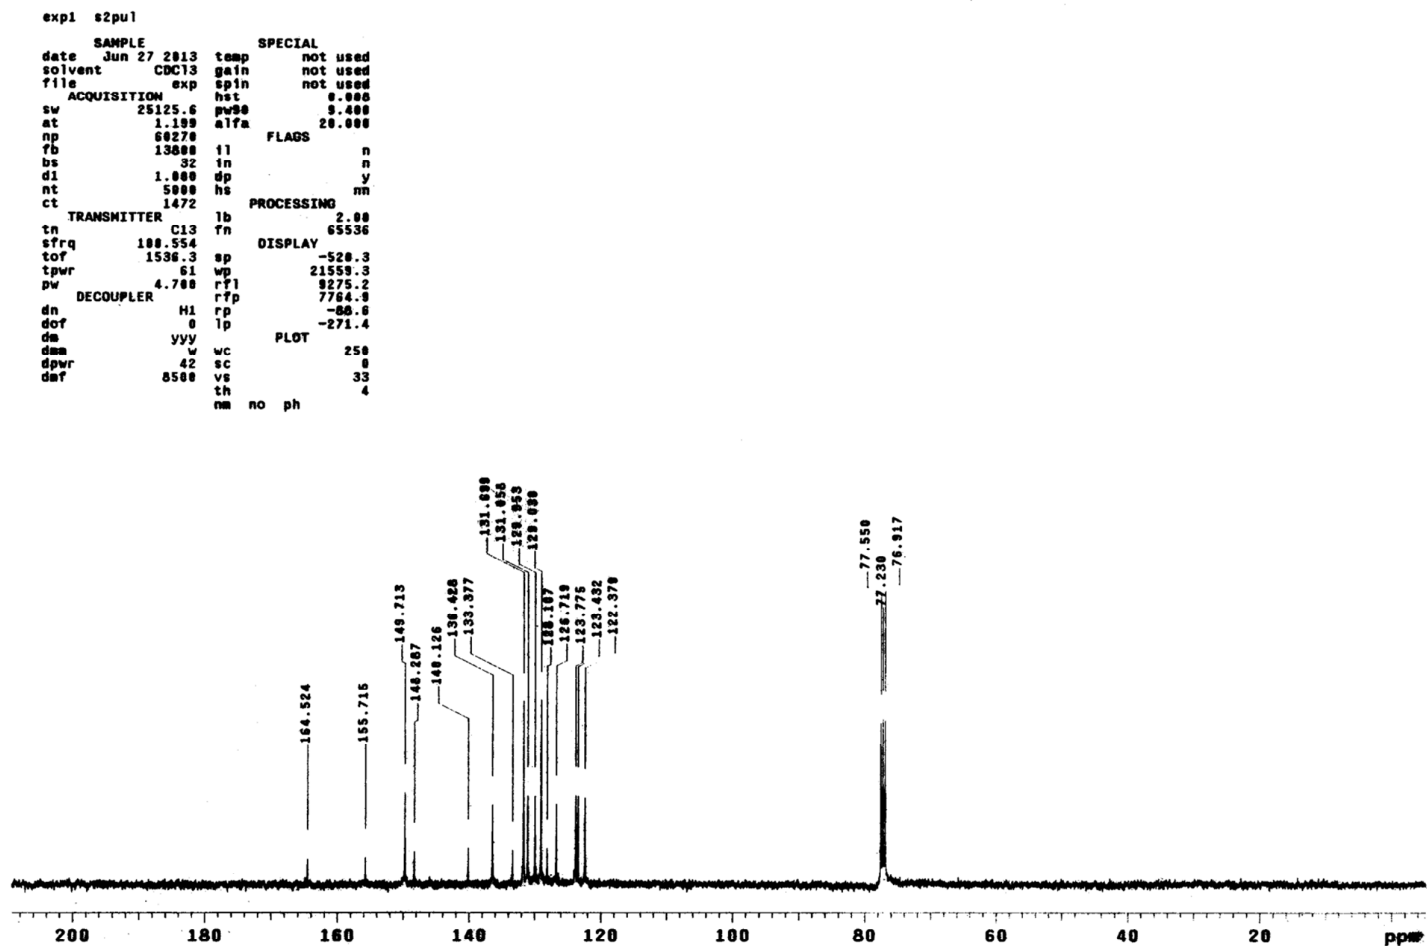

2-(Pyridin-2-yl)phenyl 4-bromobenzoate (1g):  $^1\text{H}$  NMR (400 MHz,  $\text{CDCl}_3$ )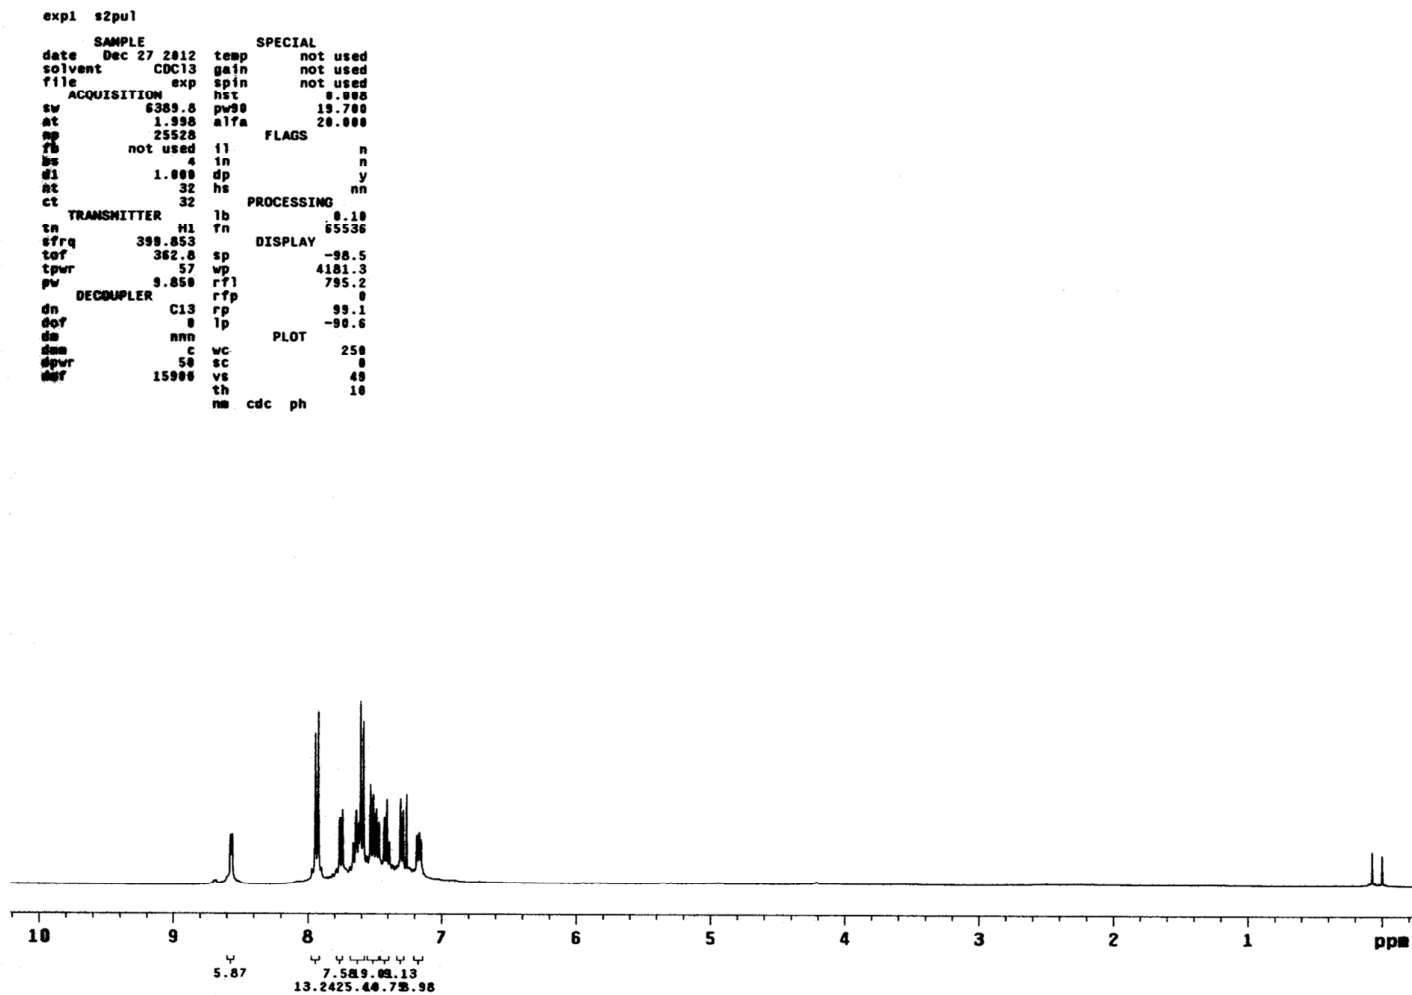

2-(Pyridin-2-yl)phenyl 4-bromobenzoate (1g):  $^{13}\text{C}$  NMR (100 MHz,  $\text{CDCl}_3$ )

```
exp1 s2pu1
SAMPLE
date May 6 2013 temp not used
solvent  $\text{CDCl}_3$  gain not used
file exp sp1n not used
ACQUISITION hst 0.000
sw 25125.6 pw90 9.400
at 1.100 a17a 20.000
np 60270
fb 13000 fl n
bs 32 in n
dl 1.000 dp y
nt 5000 hs
ct 2144
TRANSMITTER lb 2.00
tn C13 fn 65536
sfrq 100.554
tof 1530.3 sp DISPLAY -1509.5
tpwr 61 wp 25125.6
pw 4.700 rfi 3274.4
DECOUPLER H1 rfp 7764.9
dn H1 rp -45.3
dof 0 lp -341.7
da yyy PLOT
dms w wc 250
dpr 42 sc 0
dnt 8500 vs 46
tn 3
no ph
```

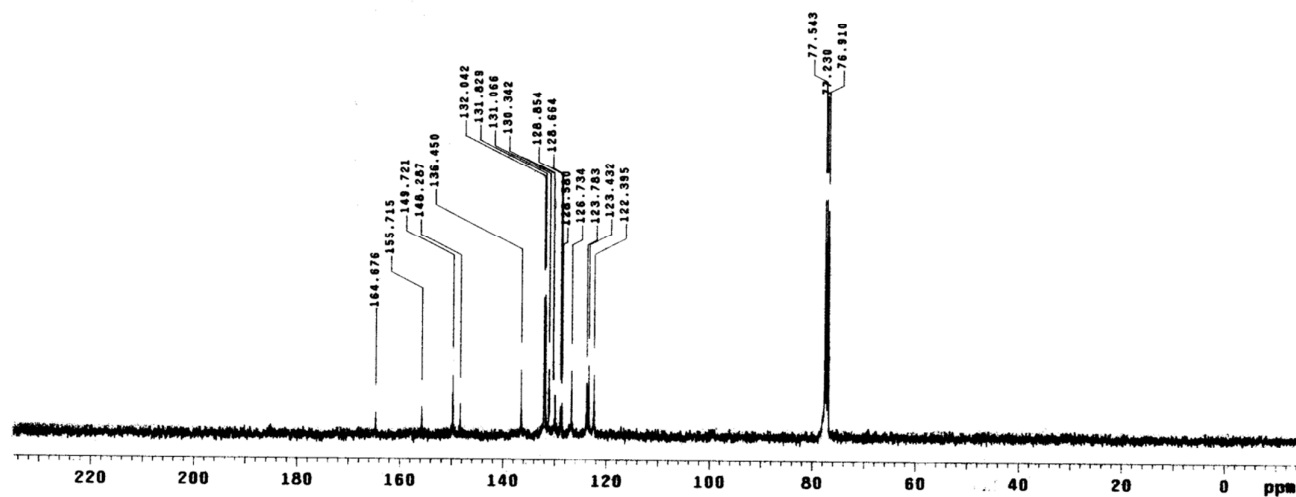

2-(Pyridin-2-yl)phenyl 2-naphthoate (1h):  $^1\text{H}$  NMR (400 MHz,  $\text{CDCl}_3$ )

```

nmr4 s2pu1
SAMPLE
date Jun 21 2013 temp not used
solvent CDCl3 gain not used
file exp spin not used
ACQUISITION hst 0.000
sw 6389.6 pw90 15.100
at 1.998 a1fa 20.000
np 25528 FLAGS
fb not used f1 n
bs 4 f2 n
d1 1.000 dp y
nt 32 hs nn
ct 32
TRANSMITTER lb 0.10
tn H1 fn 65536
sfrq 399.853 DISPLAY
tof 362.6 sp -39.1
tpwr 59 wp 4383.0
pw 7.550 rf1 3688.1
DECOUPLER C13 rf2 2894.9
dn 0 rp 138.3
dof 0 lp -47.1
dm nnn PLOT
dms c wc 250
dpr 44 sc 0
dnt 17100 vs 34
nm cdc ph th 3

```

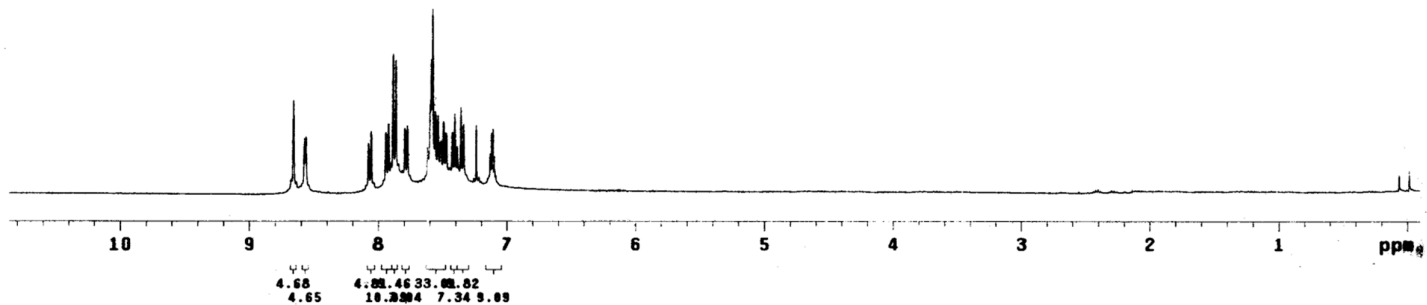

2-(Pyridin-2-yl)phenyl 2-naphthoate (1h):  $^{13}\text{C}$  NMR (100 MHz,  $\text{CDCl}_3$ )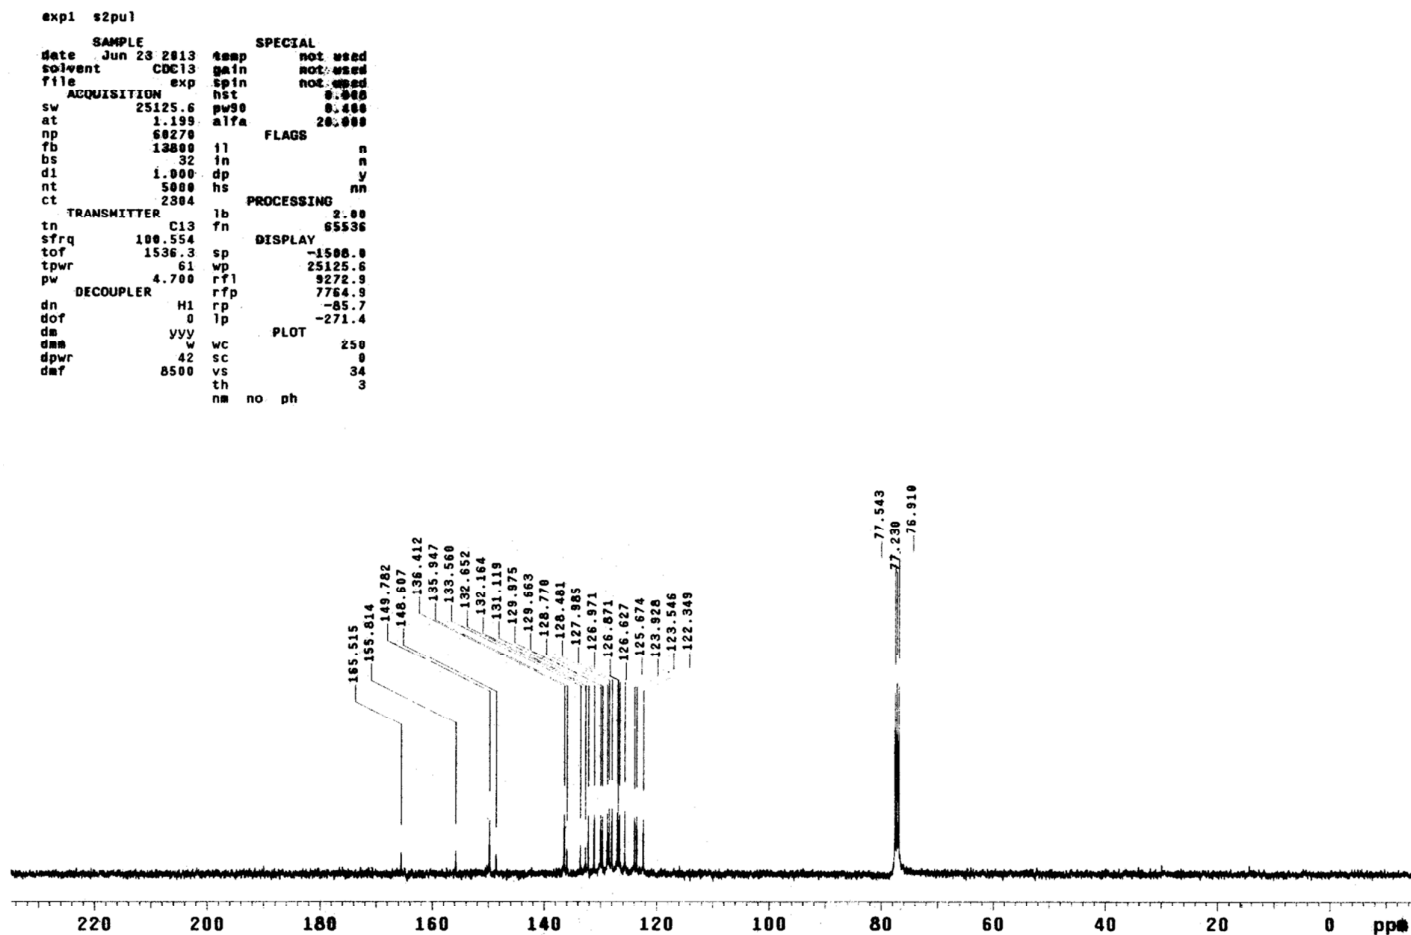

5-Methyl-2-(pyridine-2-yl)phenyl benzoate (2a):  $^1\text{H}$  NMR (400 MHz,  $\text{CDCl}_3$ )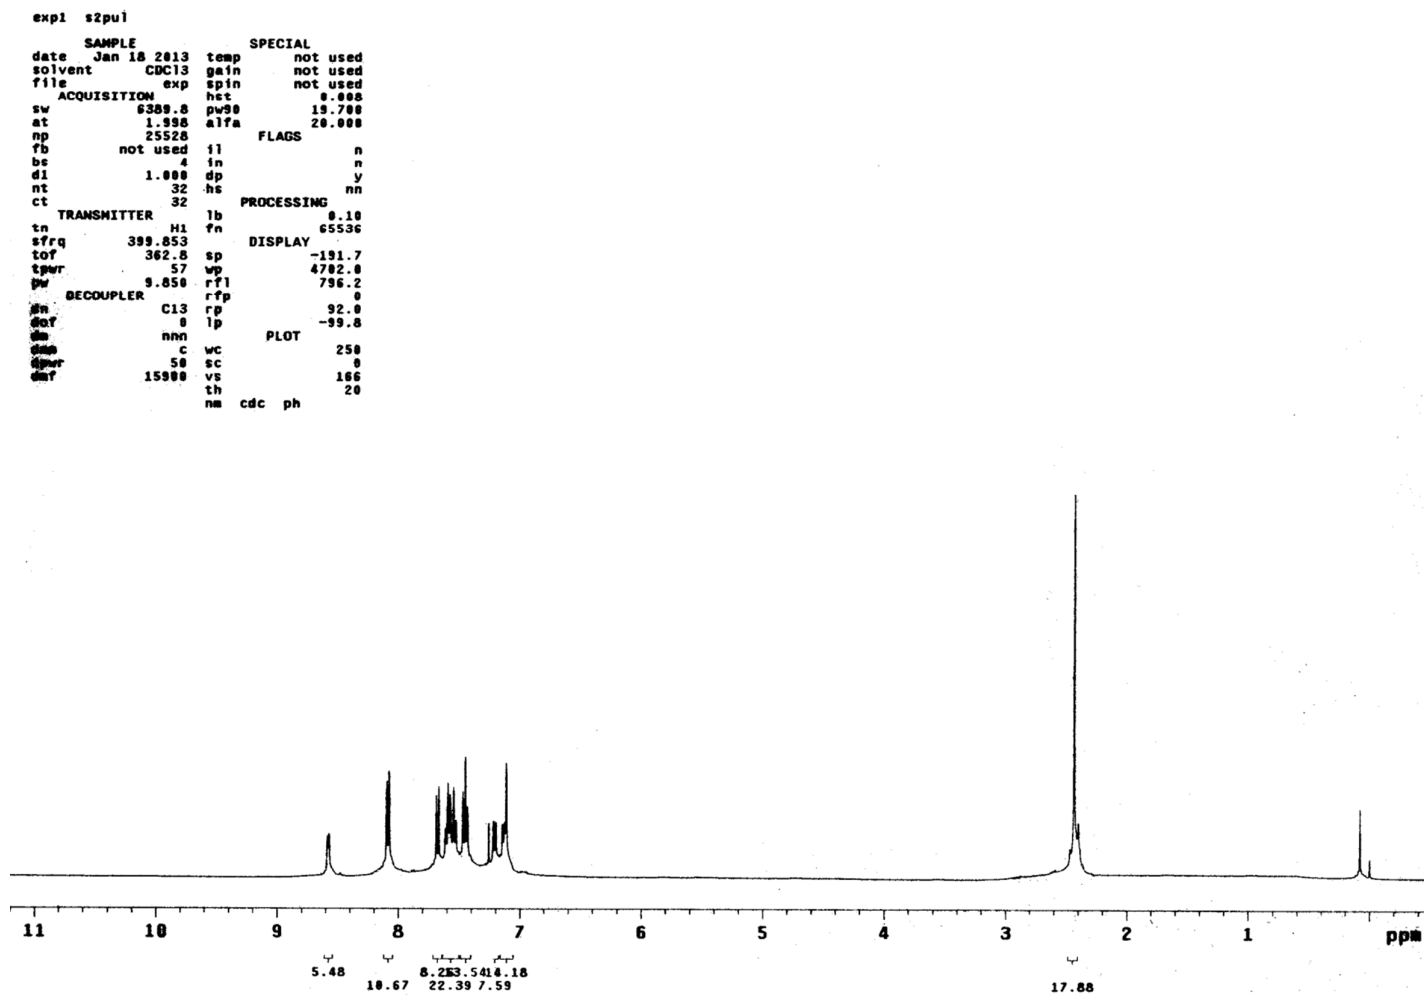

5-Methyl-2-(pyridine-2-yl)phenyl benzoate (2a):  $^{13}\text{C}$  NMR (100 MHz,  $\text{CDCl}_3$ )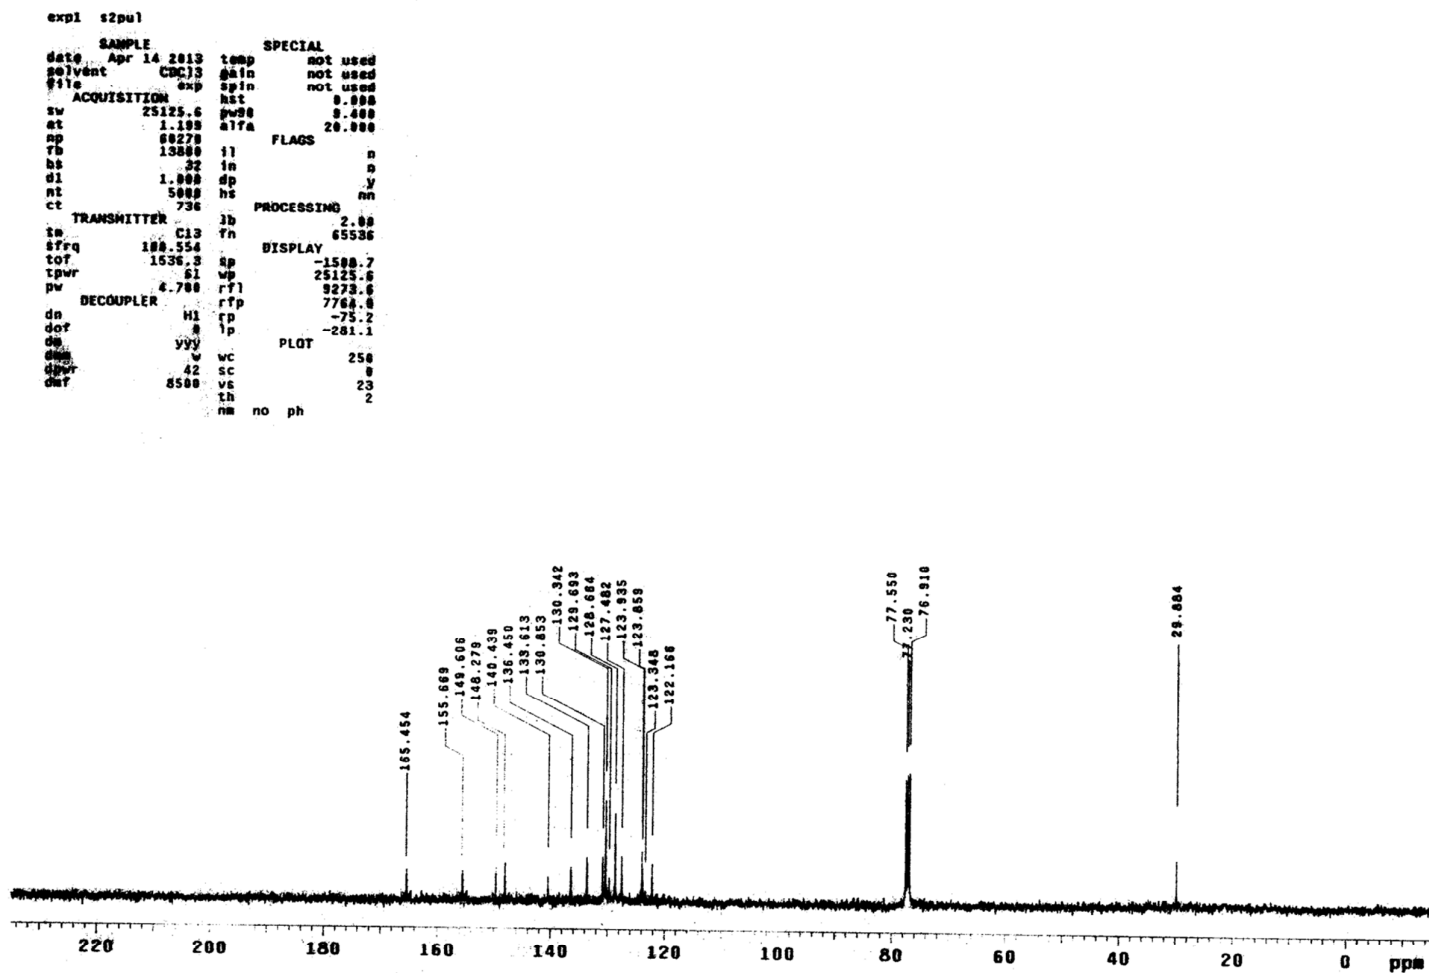

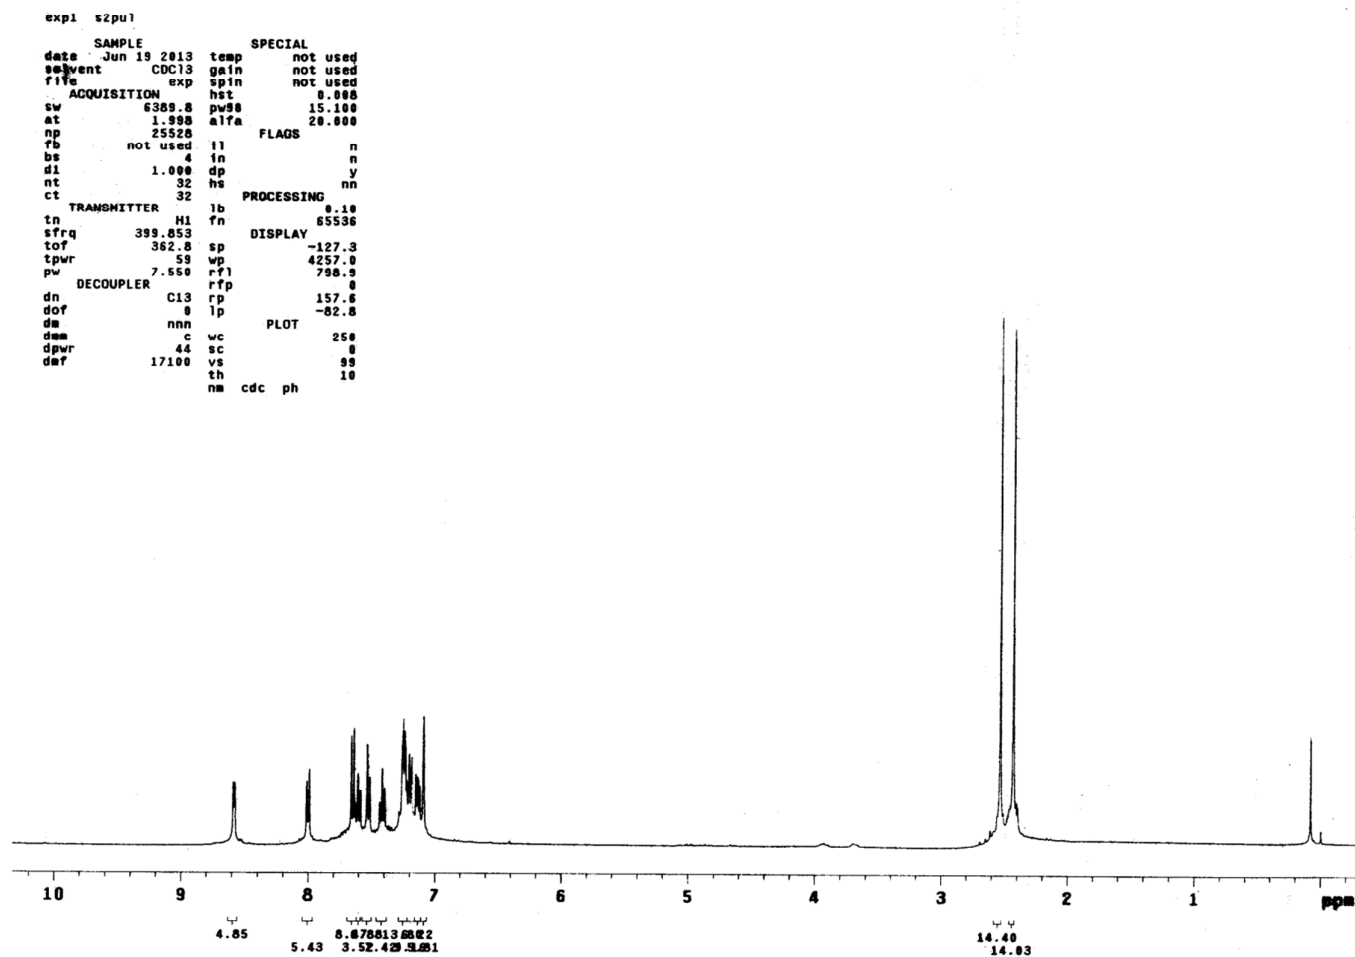



5-Methyl-2-(pyridine-2-yl)phenyl 2-methylbenzoate (2b):  $^{13}\text{C}$  NMR (100 MHz,  $\text{CDCl}_3$ )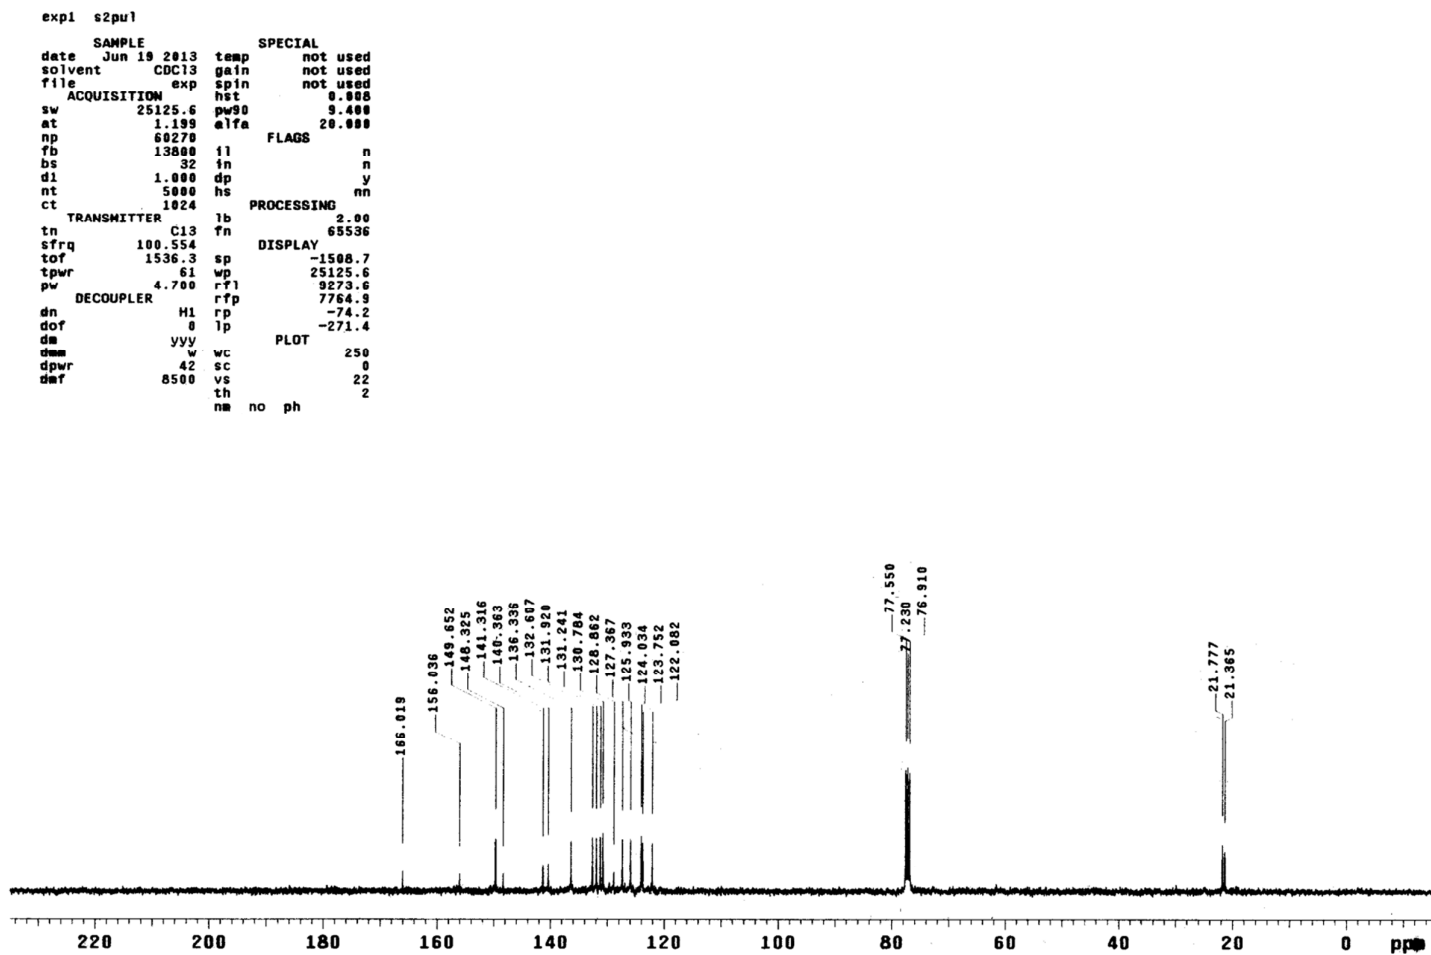

5-Methyl-2-(pyridine-2-yl)phenyl 4-methylbenzoate (2c):  $^1\text{H}$  NMR (400 MHz,  $\text{CDCl}_3$ )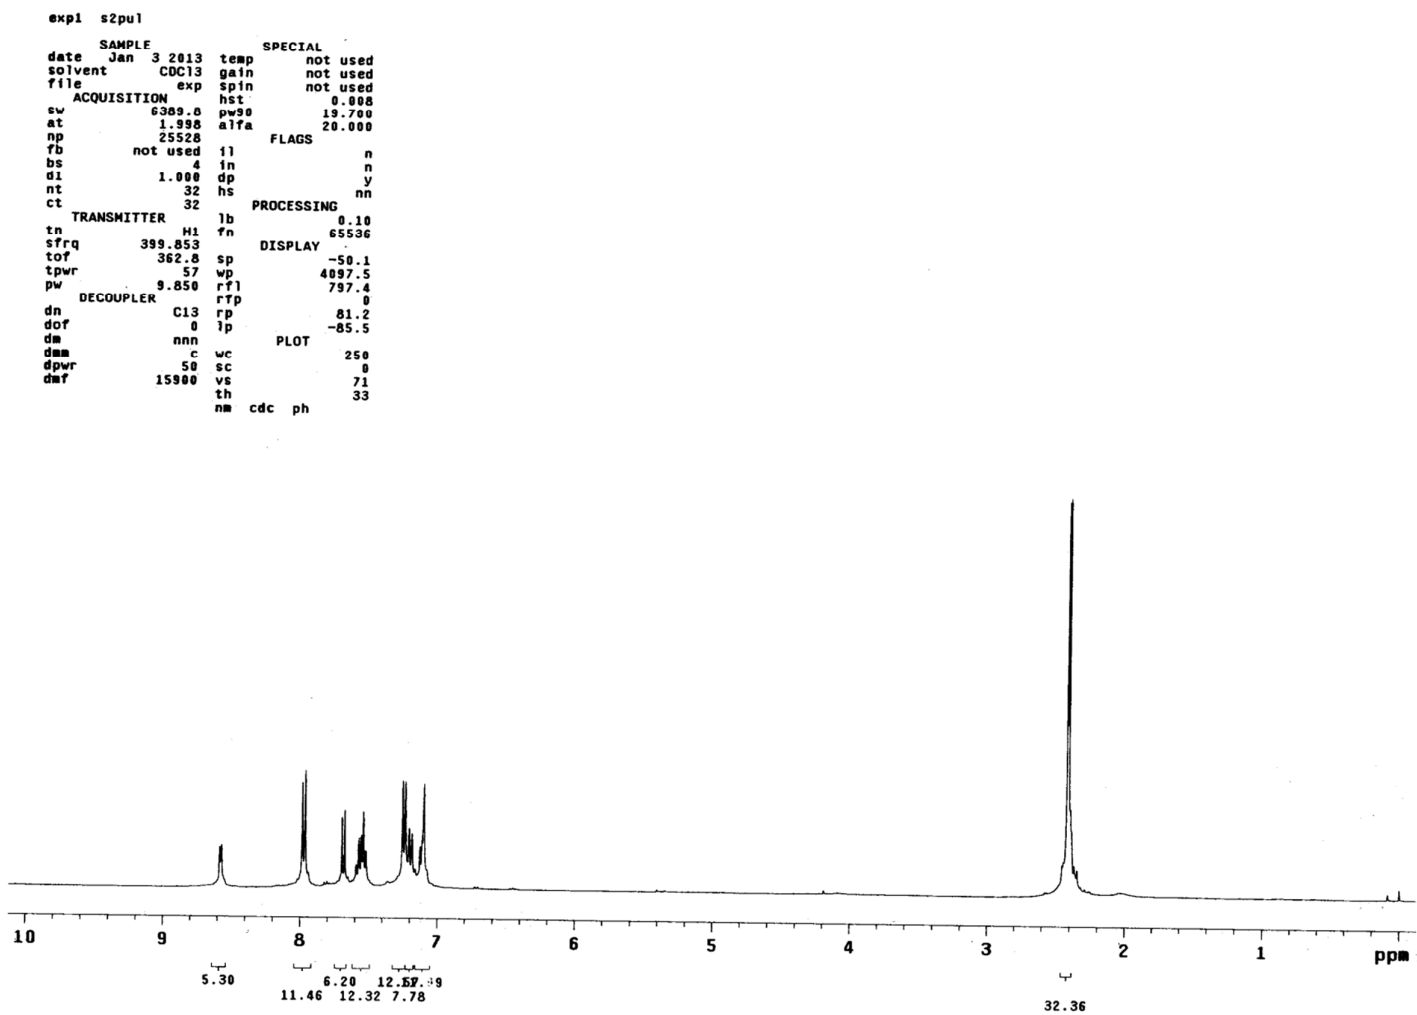

5-Methyl-2-(pyridine-2-yl)phenyl 4-methylbenzoate (2c):  $^{13}\text{C}$  NMR (100 MHz,  $\text{CDCl}_3$ )

```
exp1 s2pu1
SAMPLE
date Apr 29 2013 temp not used
solvent CDCl3 gain not used
file exp spin not used
ACQUISITION
sw 25125.6 pw90 9.400
at 1.199 alfa 20.000
np 68270
fb 13800
bs 32 tn n
d1 1.000 dp y
nt 5000 hs nn
ct 1344
TRANSMITTER lb 2.00
tn C13 rn 65536
sfrq 100.554
tof 1536.3 sp DISPLAY
tpwr 61 wp 25125.6
pw 4.700 rfl 9275.9
DECOUPLER rfp 7764.9
dn H1 rp -87.4
dof 0 lp -279.1
dm yyy
dms w PLOT
dpwr 42 wc 250
dm7 8500 vs 26
th 3
nm no ph
```

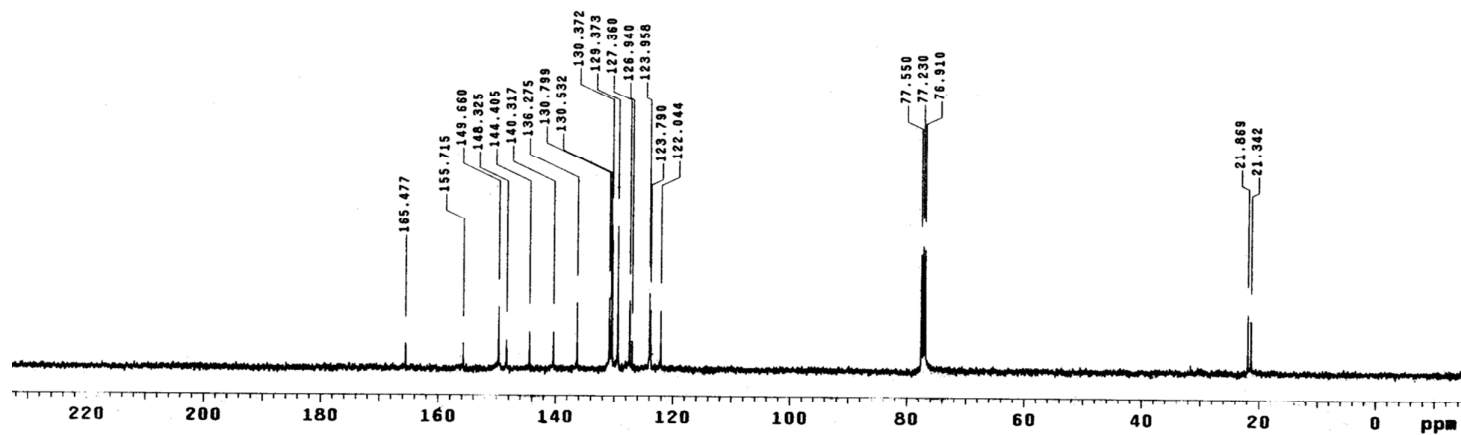

5-Methyl-2-(pyridine-2-yl)phenyl 2,4,6-trimethylbenzoate (2d):  $^1\text{H}$  NMR (600 MHz,  $\text{CDCl}_3$ )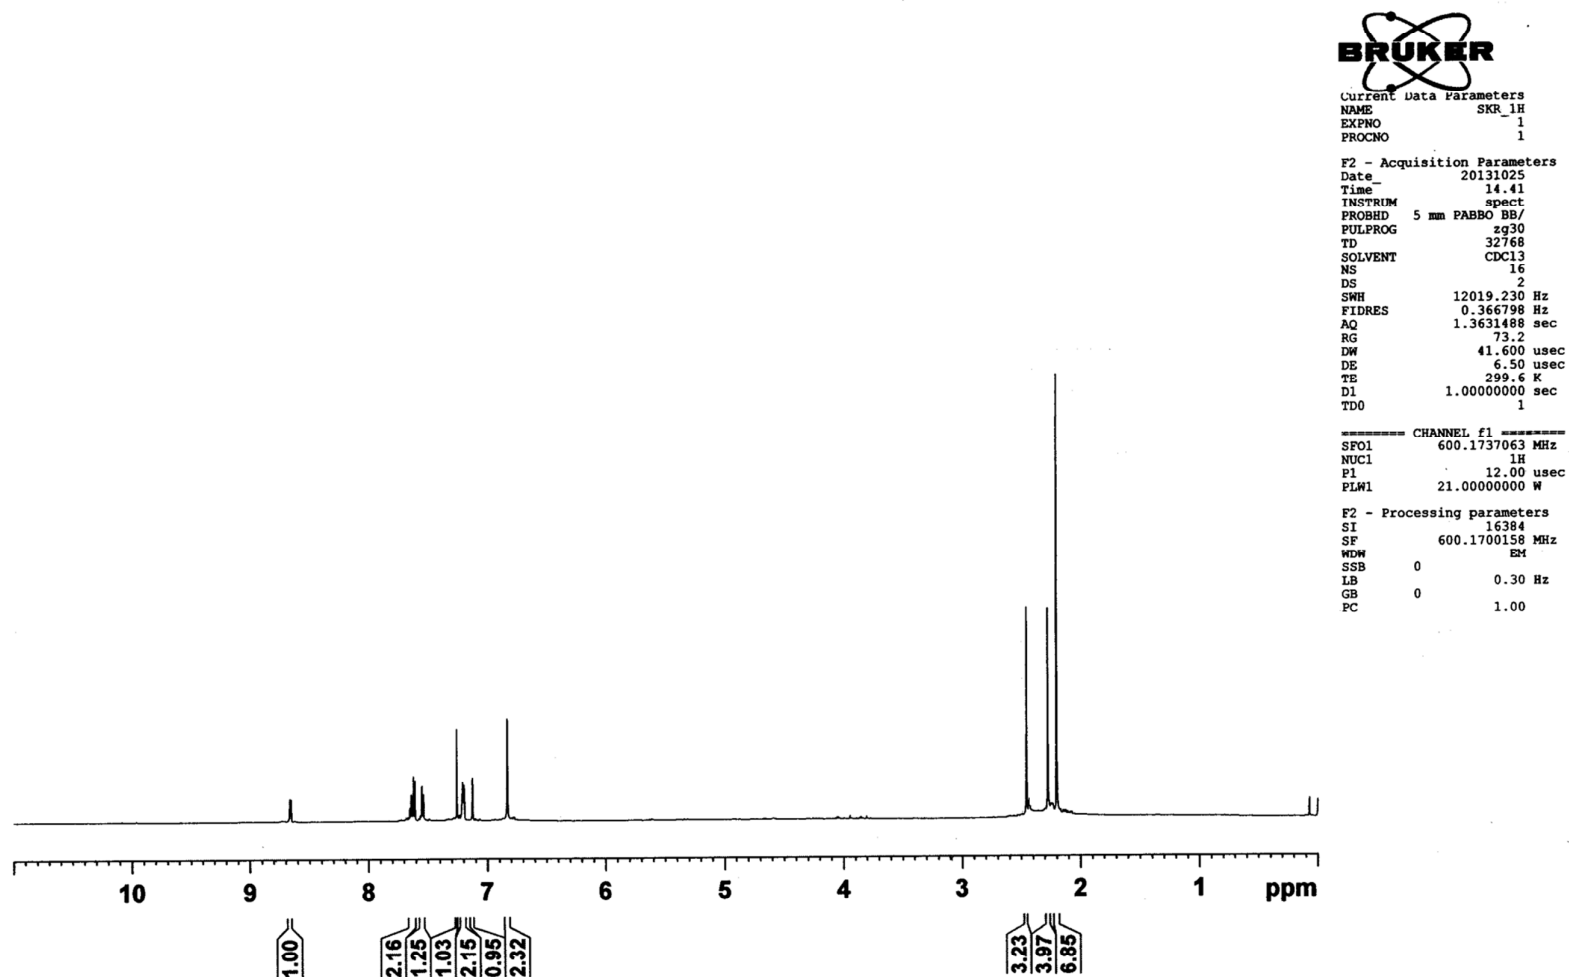

5-Methyl-2-(pyridine-2-yl)phenyl 2,4,6-trimethylbenzoate (2d):  $^{13}\text{C}$  NMR (150 MHz,  $\text{CDCl}_3$ )

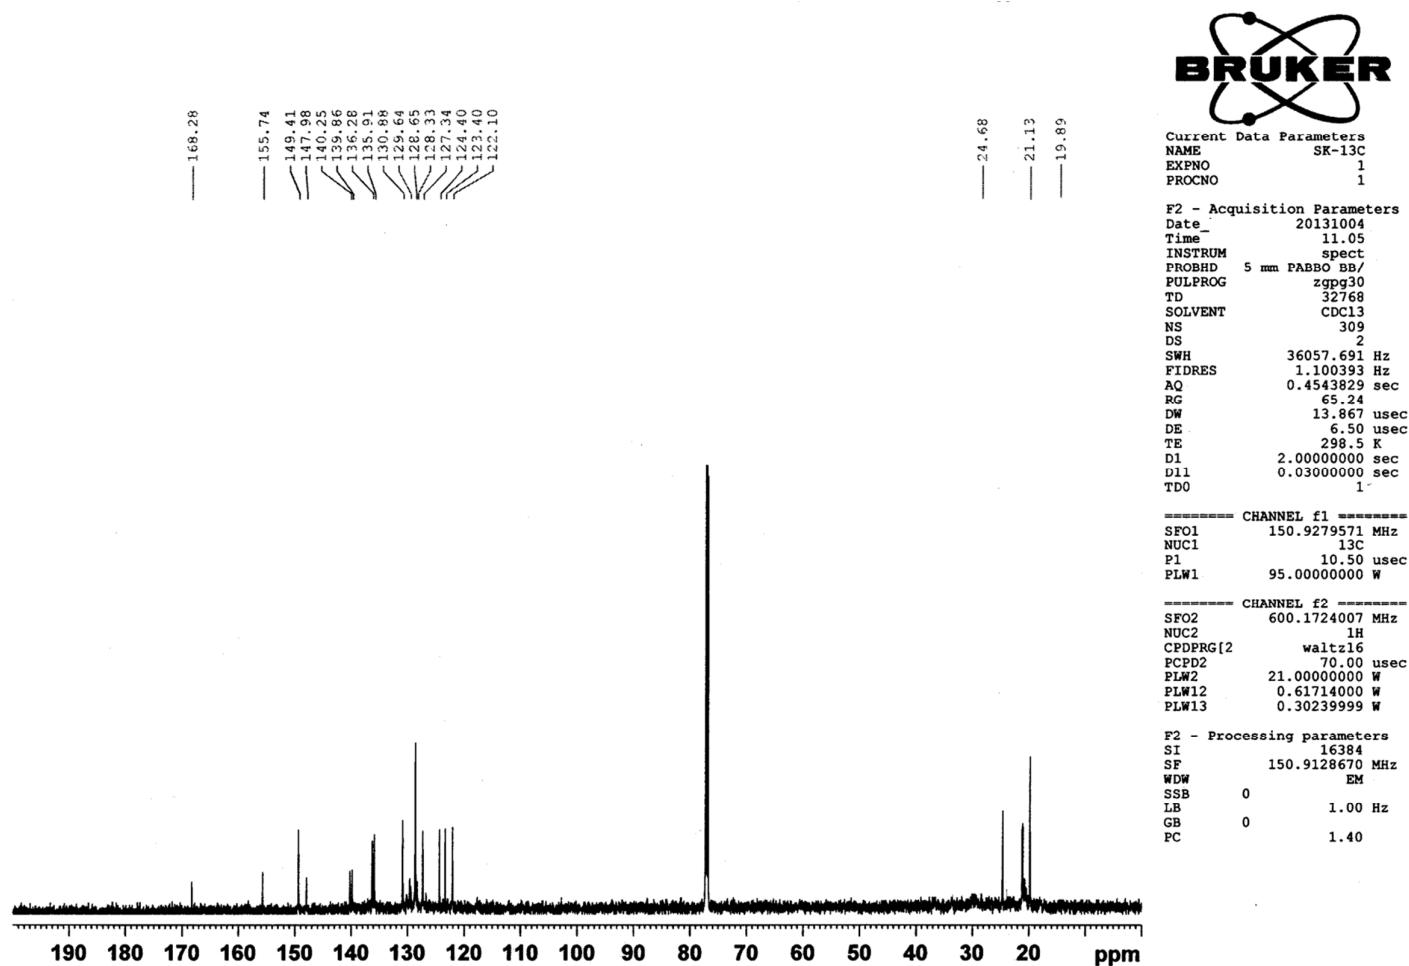

5-Methyl-2-(pyridine-2-yl)phenyl 4-methoxybenzoate (2e):  $^1\text{H}$  NMR (400 MHz,  $\text{CDCl}_3$ )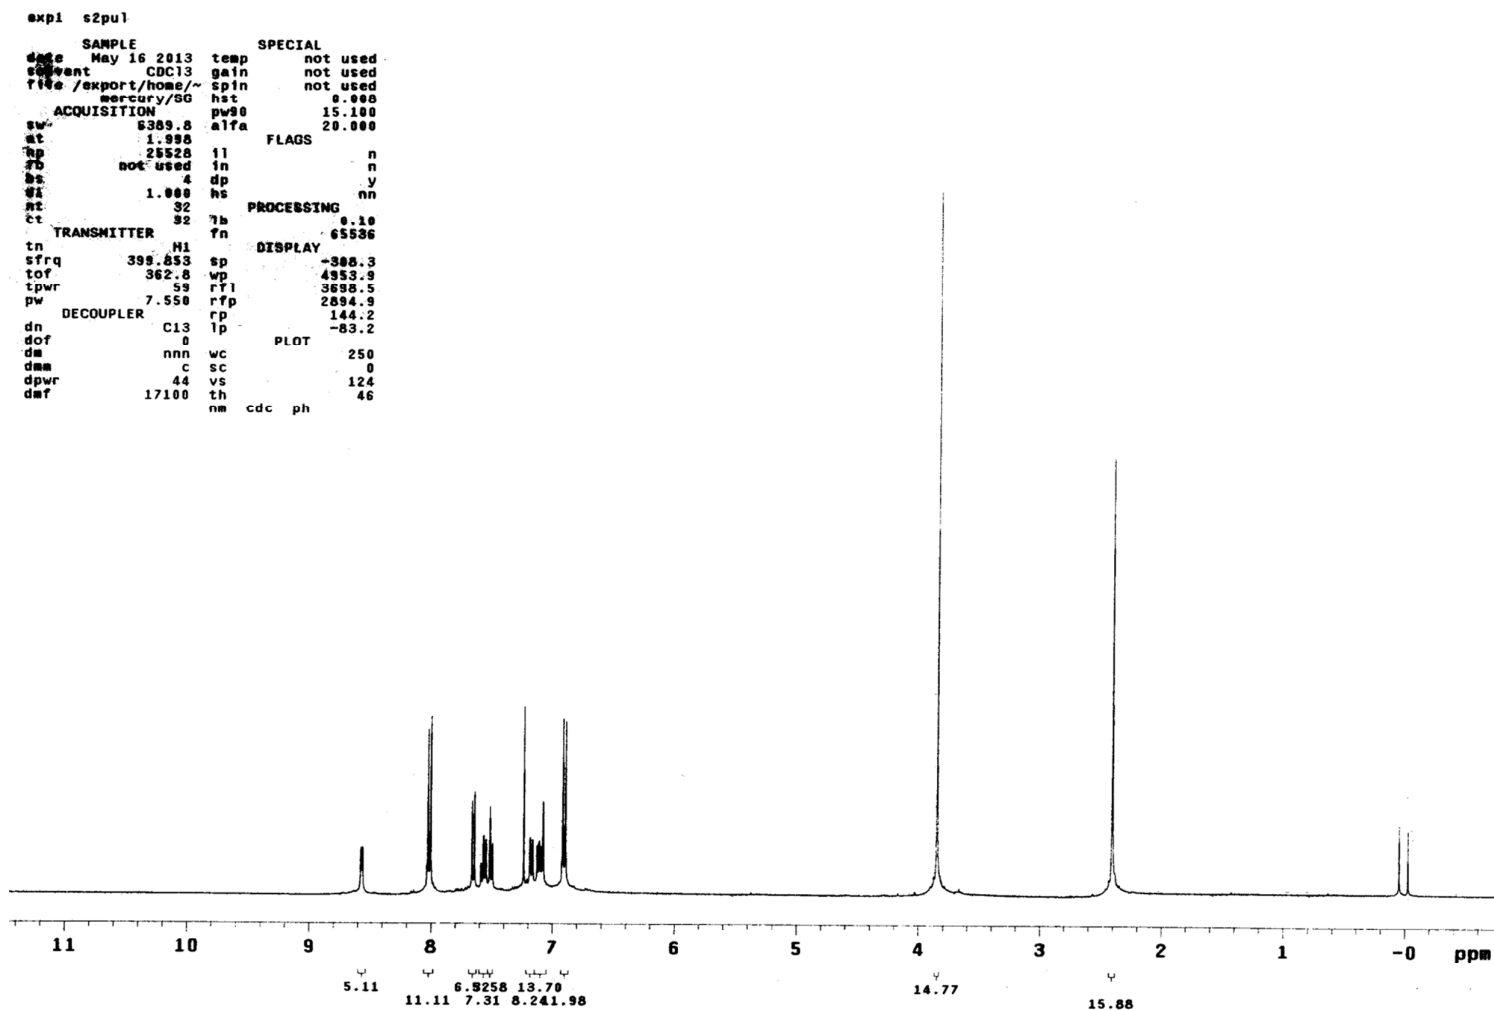

5-Methyl-2-(pyridine-2-yl)phenyl 4-methoxybenzoate (2e):  $^{13}\text{C}$  NMR (100 MHz,  $\text{CDCl}_3$ )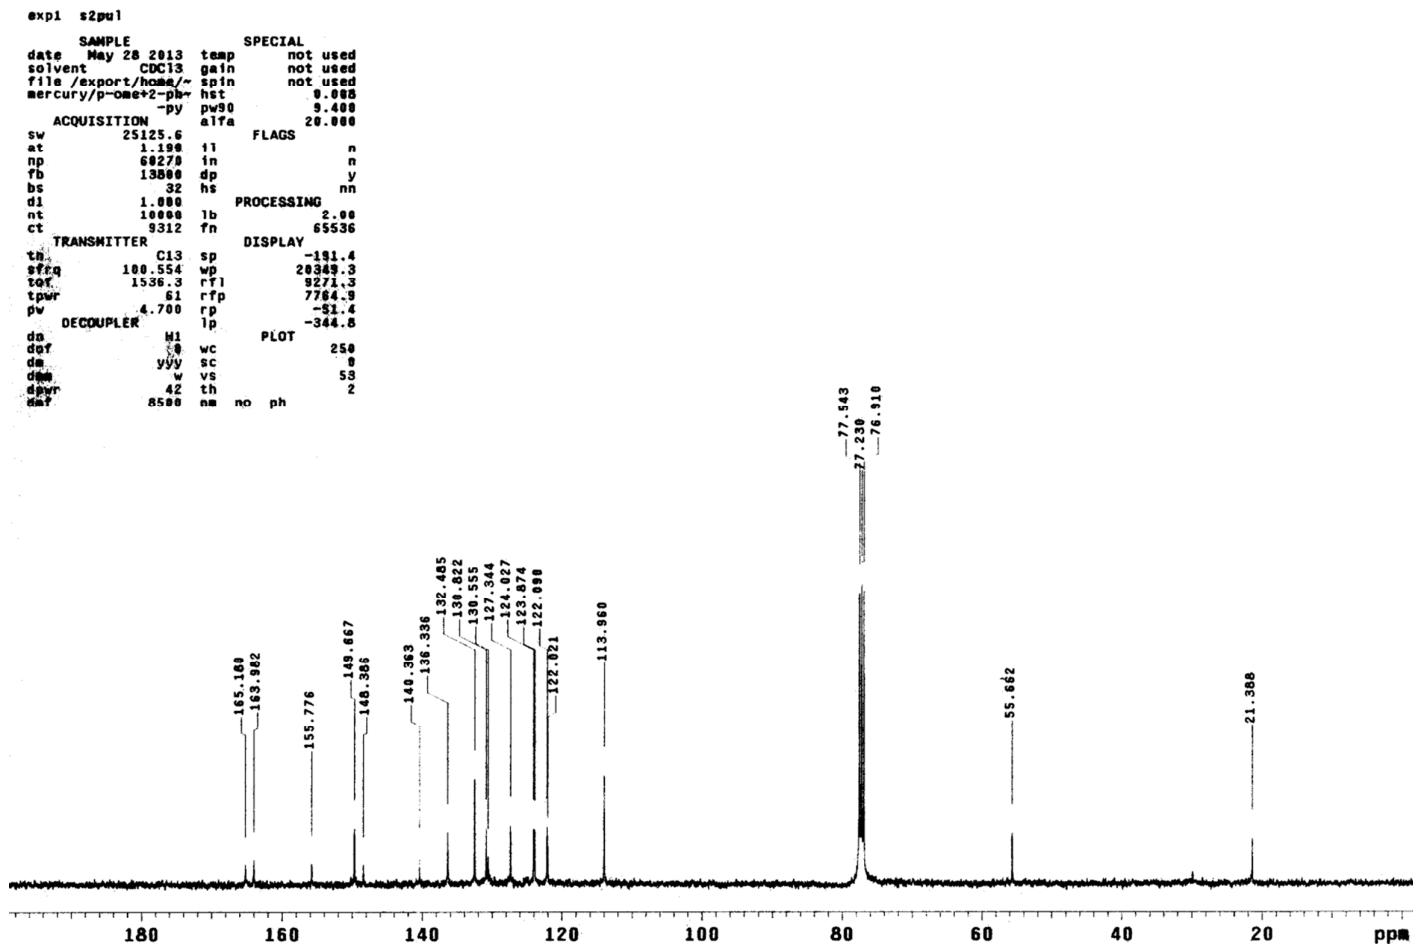

5-Methyl-2-(pyridin-2-yl)phenyl 4-chlorobenzoate (2f):  $^1\text{H}$  NMR (400 MHz,  $\text{CDCl}_3$ )

```

exp1 s2pu1
SAMPLE
date Jun 24 2013 temp not used
solvent  $\text{CDCl}_3$  gain not used
file exp spin not used
ACQUISITION
sw 6389.8 hst 9.000
at 1.998 pw90 15.100
np 25528 a17a 20.000
fb not used i1 n
bs 4 in n
dl 1.000 dp y
nt 32 hs nn
ct 32
TRANSMITTER lb 9.10
tn H1 fn 65536
sfrq 399.853
tof 362.8 sp -182.3
tpwr 59 wp 4819.6
pw 7.550 rfl 795.2
DECOUPLER rfp 0
dn C13 rp 148.3
dof 0 lp -78.5
dm nnn
dmm c
dpwr 44
dmf 17100
PLOT
wc 250
sc 0
vs 79
th 20
nm cdc ph

```

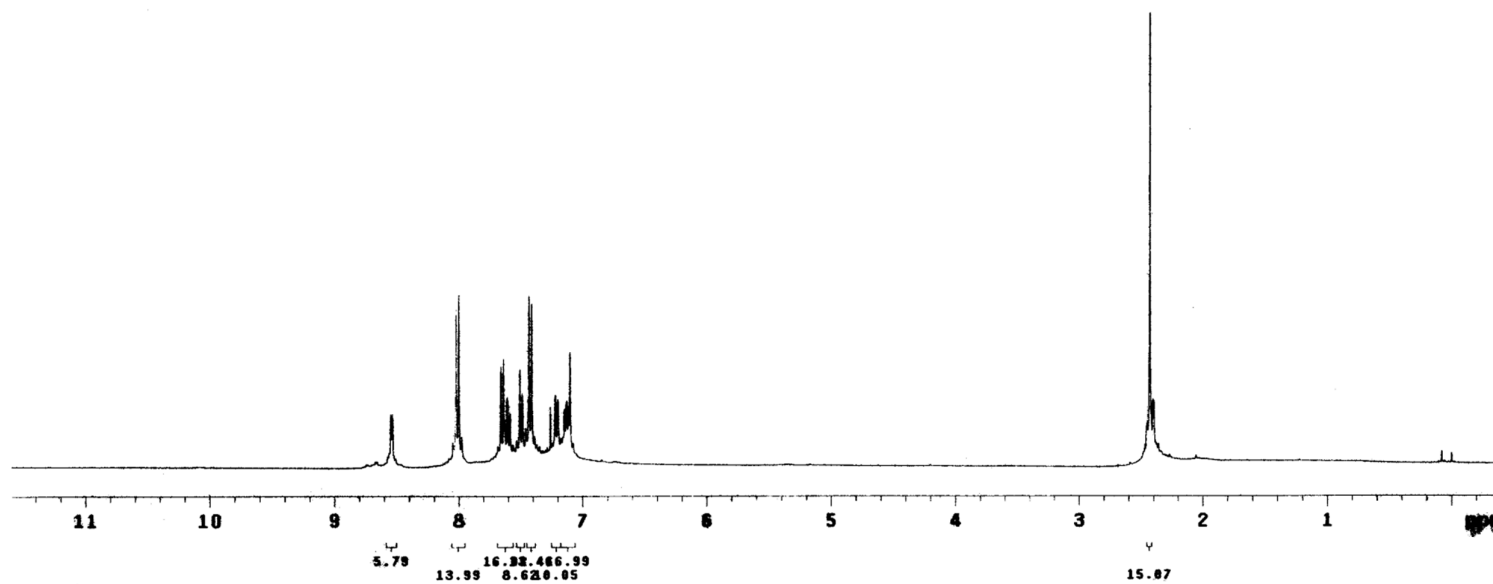



5-Methyl-2-(pyridin-2-yl)phenyl 4-chlorobenzoate (2f):  $^{13}\text{C}$  NMR (100 MHz,  $\text{CDCl}_3$ )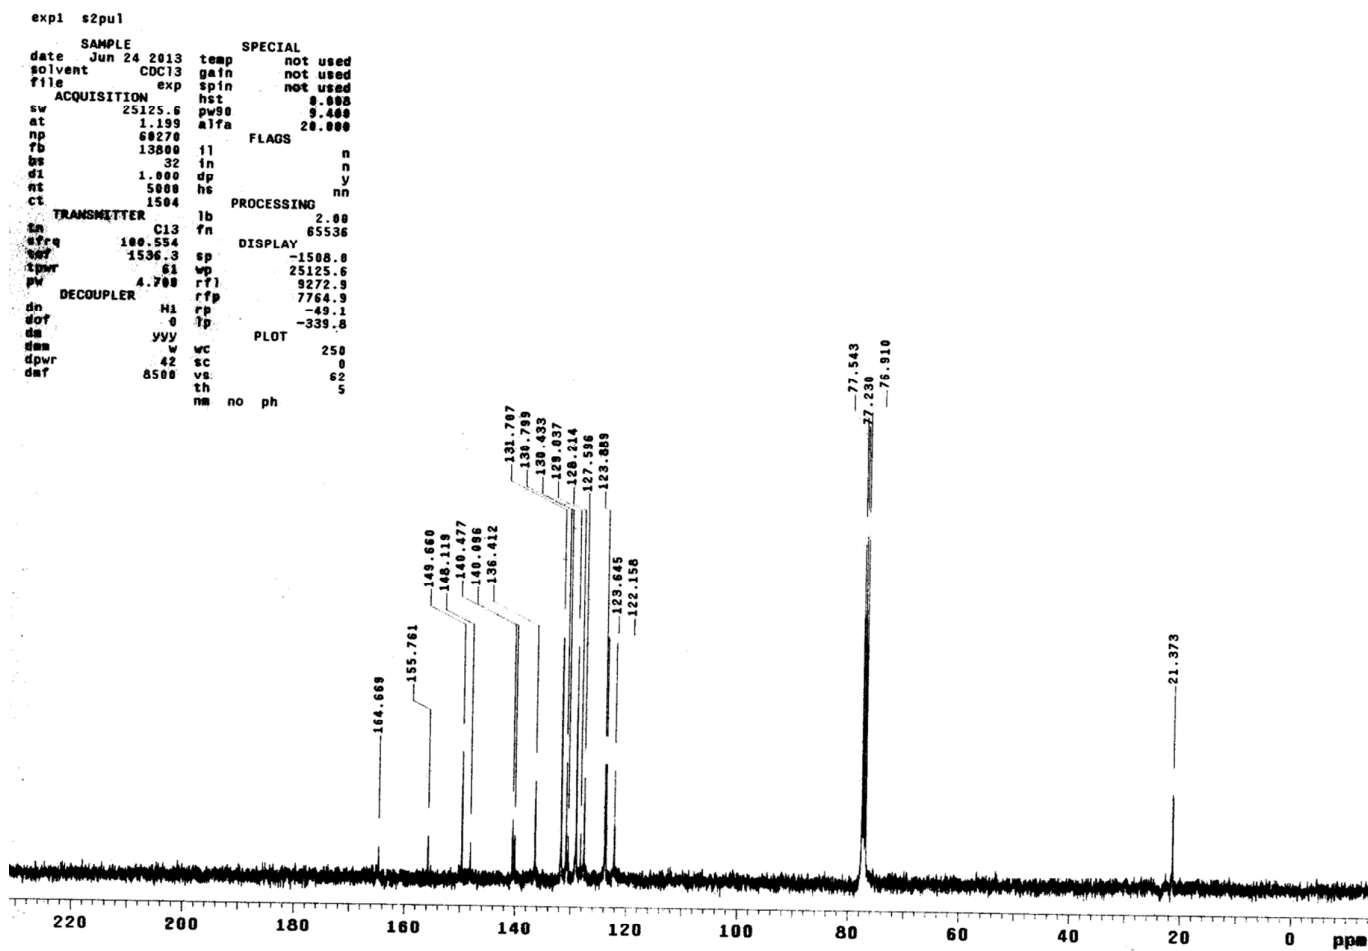

2-(Pyridin-2-yl)phenyl 3-methylbenzoate (1b):  $^1\text{H}$  NMR (400 MHz,  $\text{CDCl}_3$ )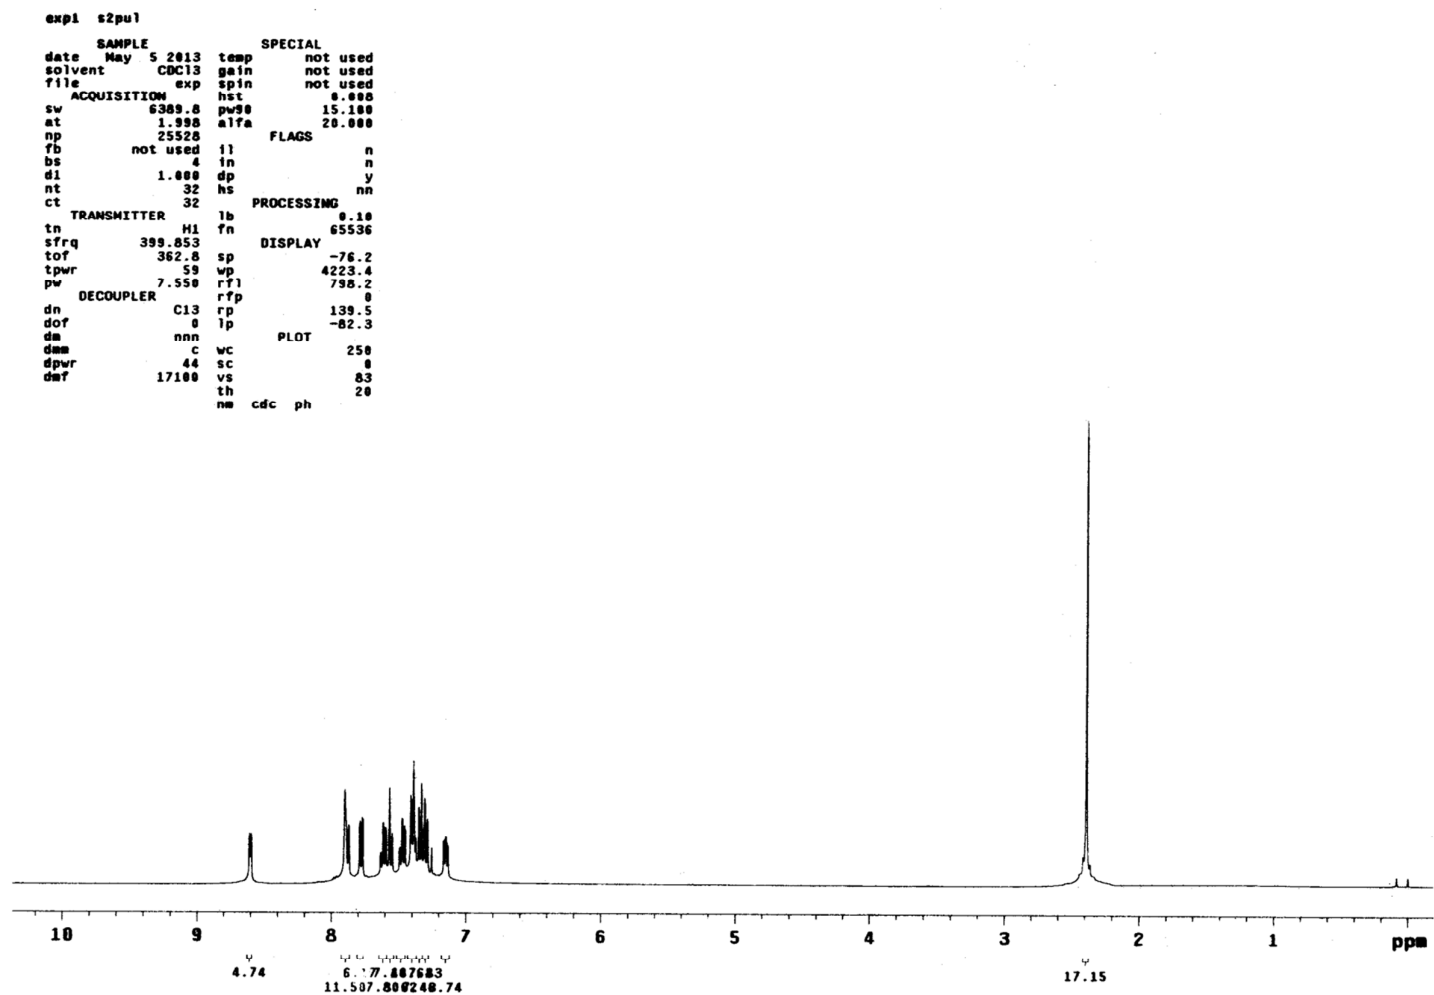

2-(Pyridin-2-yl)phenyl 3-methylbenzoate (1b):  $^{13}\text{C}$  NMR (100 MHz,  $\text{CDCl}_3$ )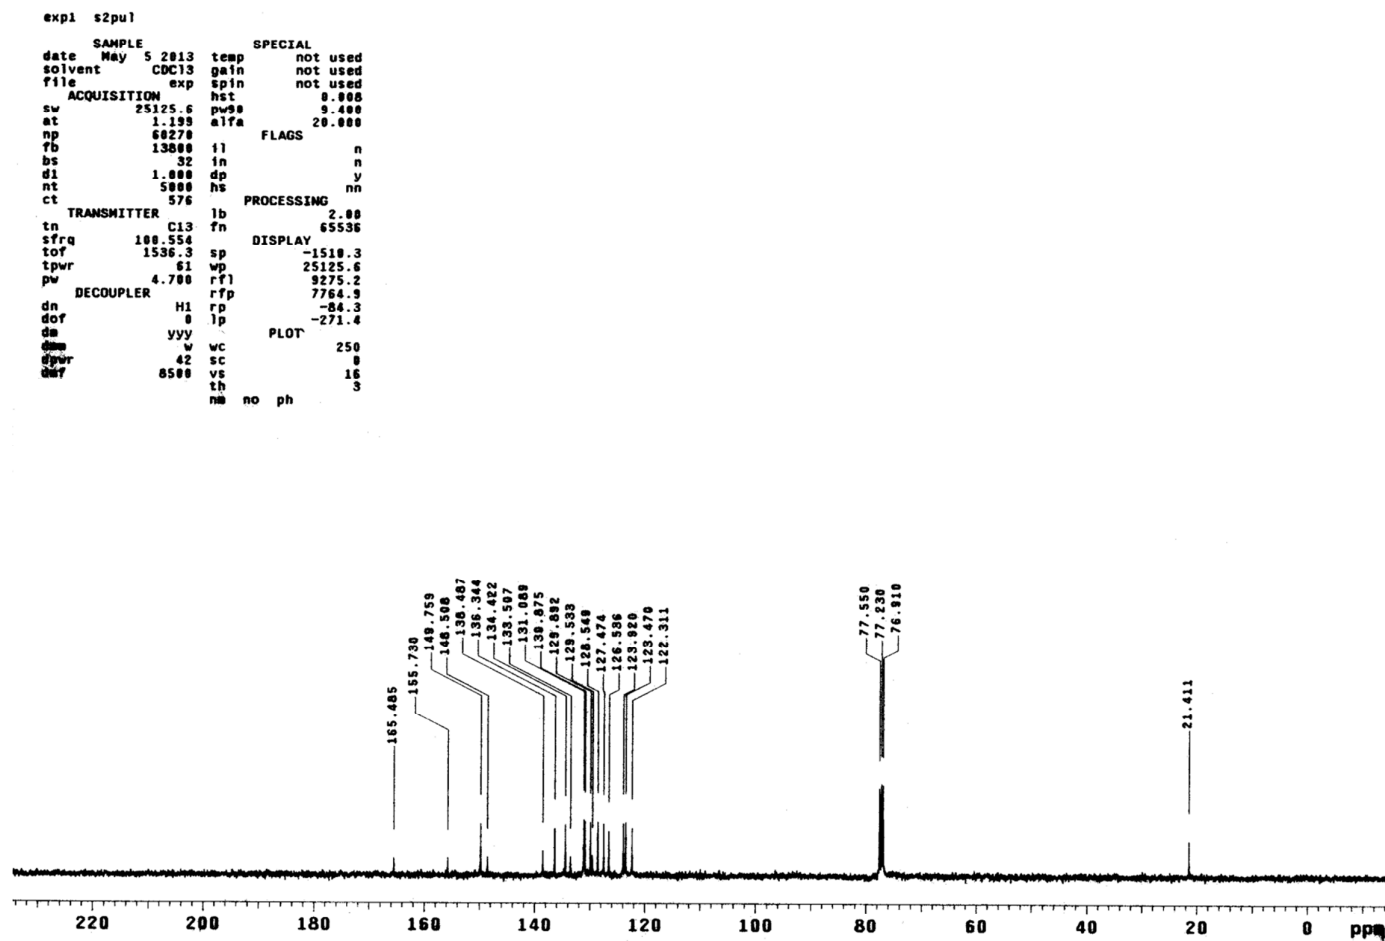

2-(Pyridin-2-yl)phenyl 4-(tert-butyl)benzoate (1c):  $^1\text{H}$  NMR (400 MHz,  $\text{CDCl}_3$ )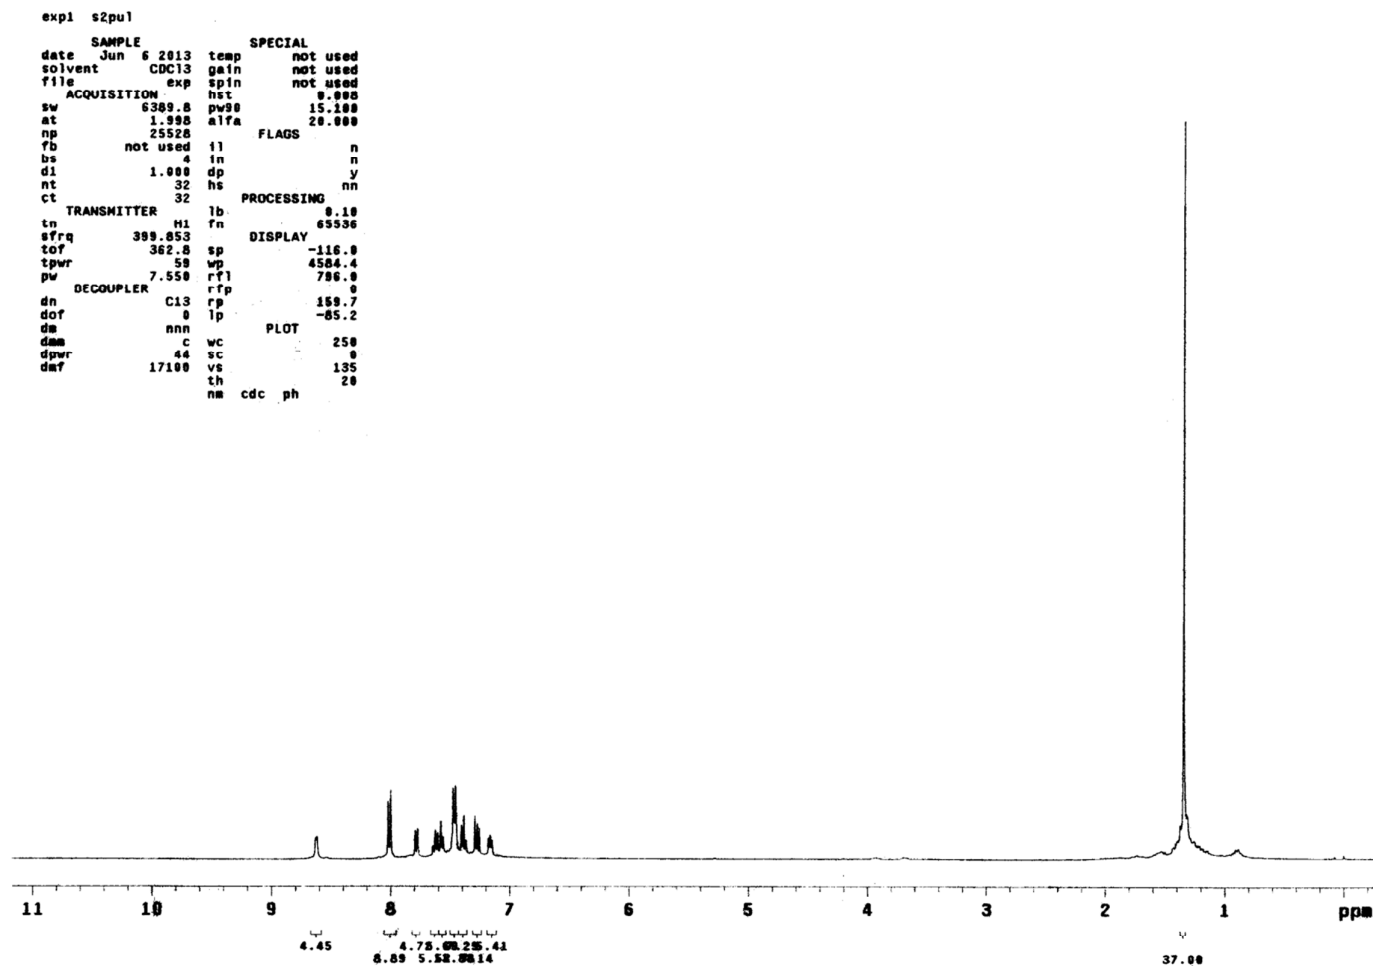

2-(Pyridin-2-yl)phenyl 4-(tert-butyl)benzoate (1c):  $^{13}\text{C}$  NMR (100 MHz,  $\text{CDCl}_3$ )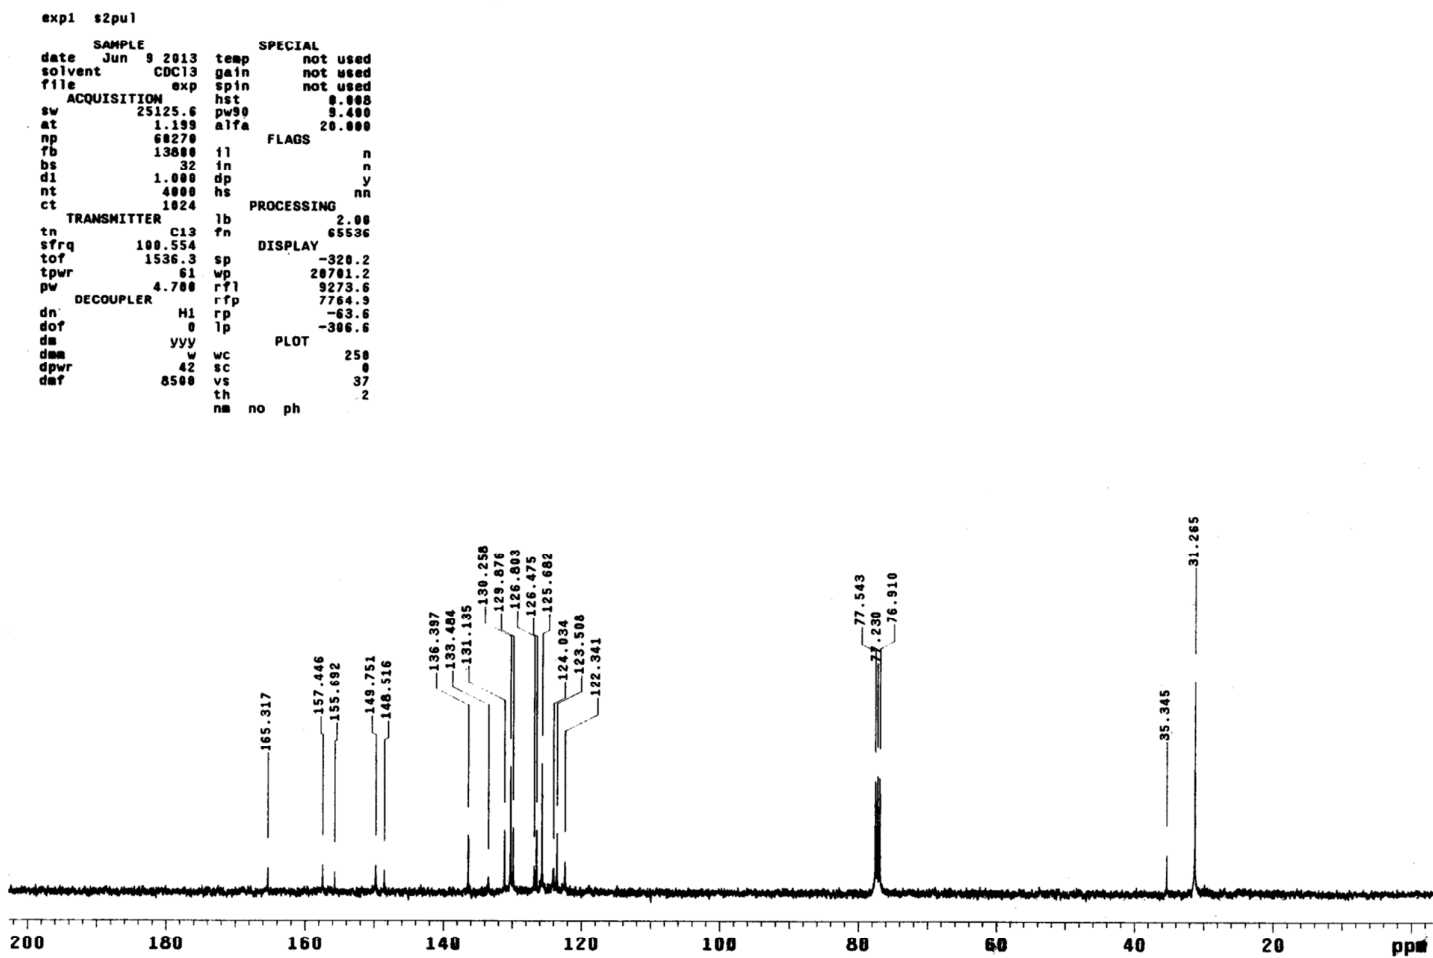

2-(Pyridin-2-yl)phenyl 3,5-dimethylbenzoate (1d):  $^1\text{H}$  NMR (400 MHz,  $\text{CDCl}_3$ )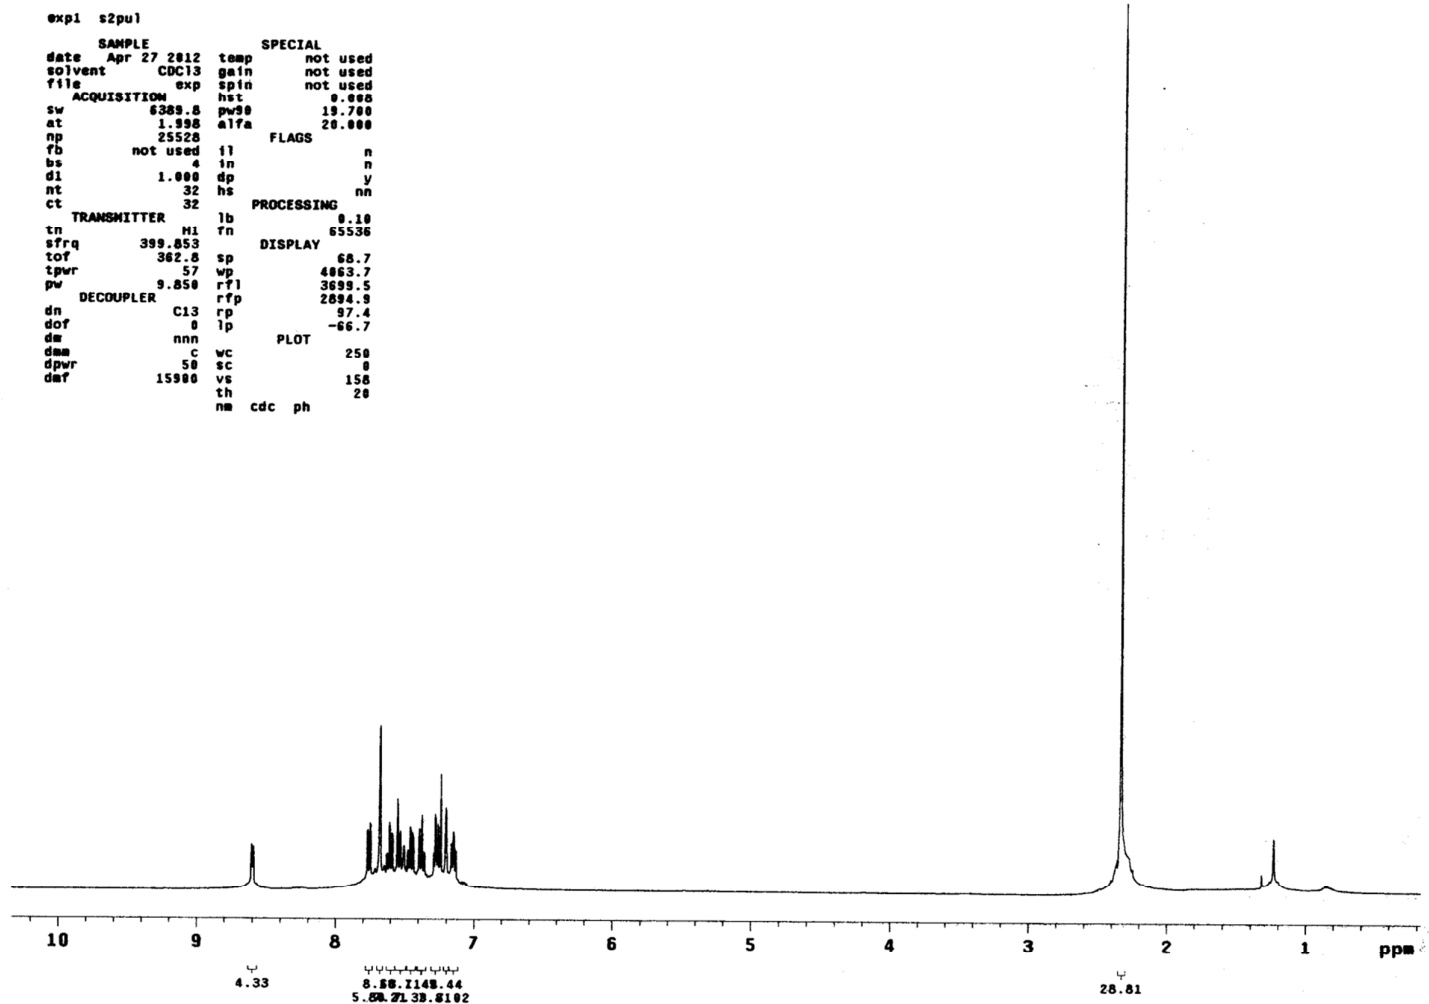

2-(Pyridin-2-yl)phenyl 3,5-dimethylbenzoate (1d):  $^{13}\text{C}$  NMR (100 MHz,  $\text{CDCl}_3$ )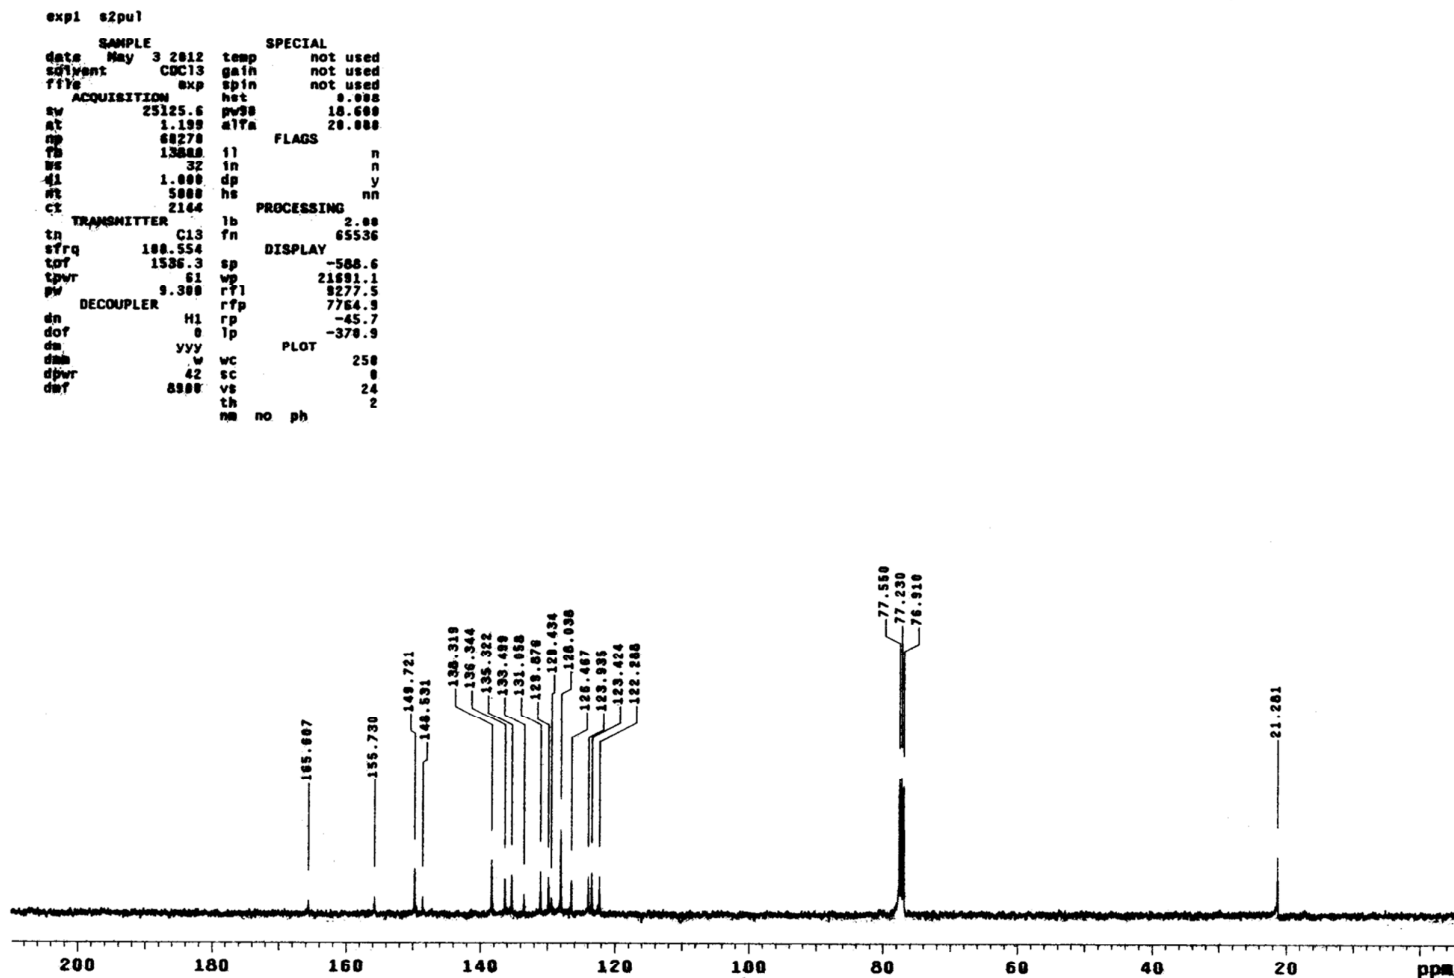

2-(Pyridin-2-yl)phenyl 3,4-dimethoxybenzoate (1e):  $^1\text{H}$  NMR (400 MHz,  $\text{CDCl}_3$ )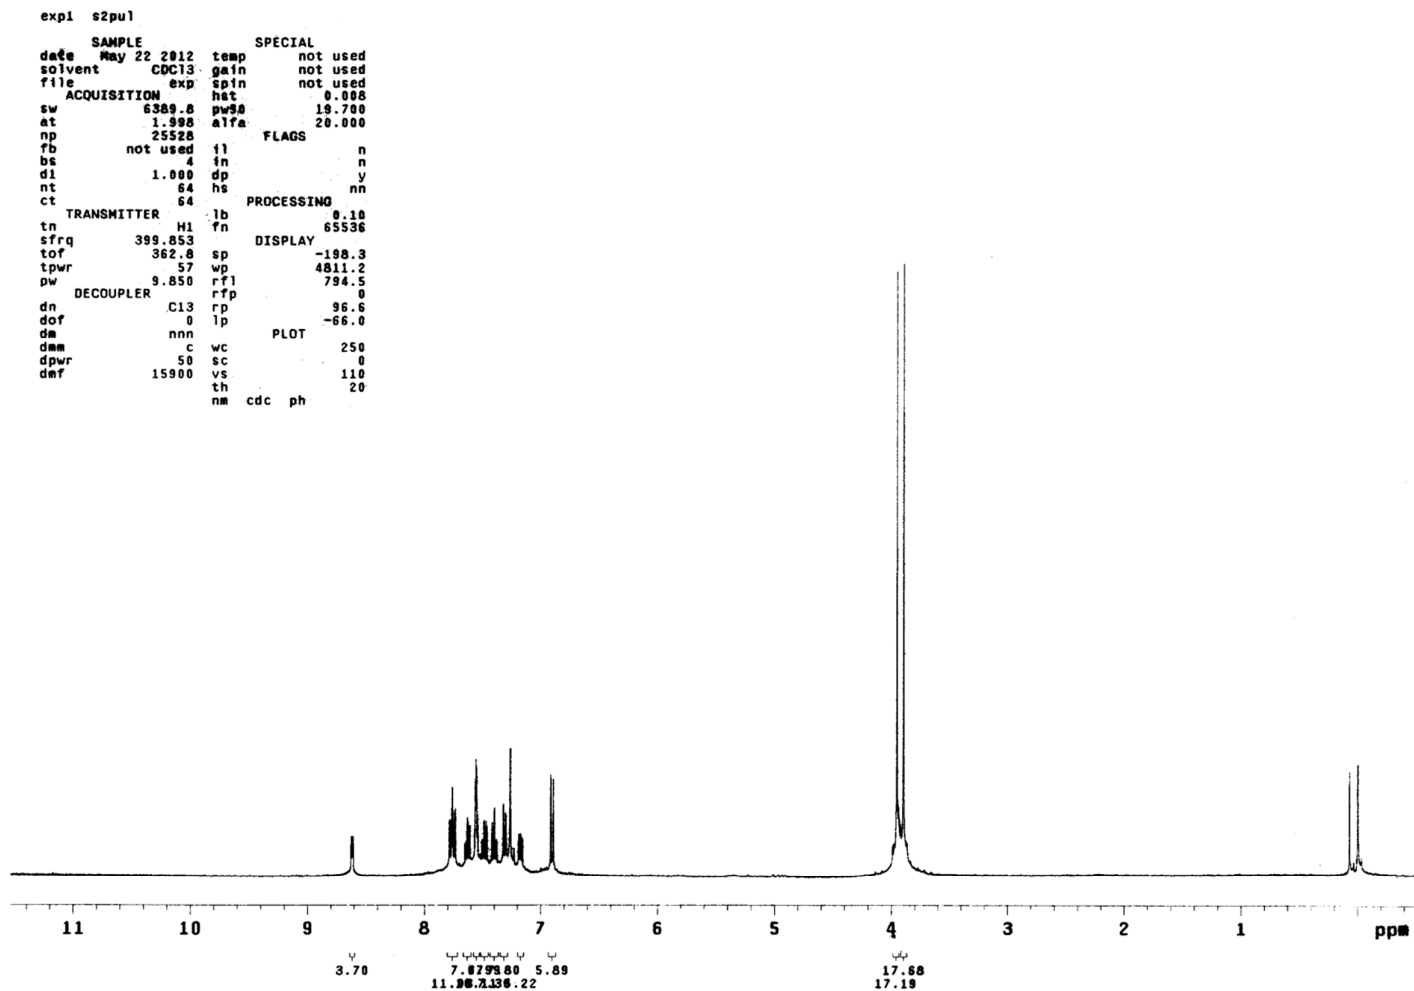



2-(Pyridin-2-yl)phenyl 3,4-dimethoxybenzoate (1e):  $^{13}\text{C}$  NMR (100 MHz,  $\text{CDCl}_3$ )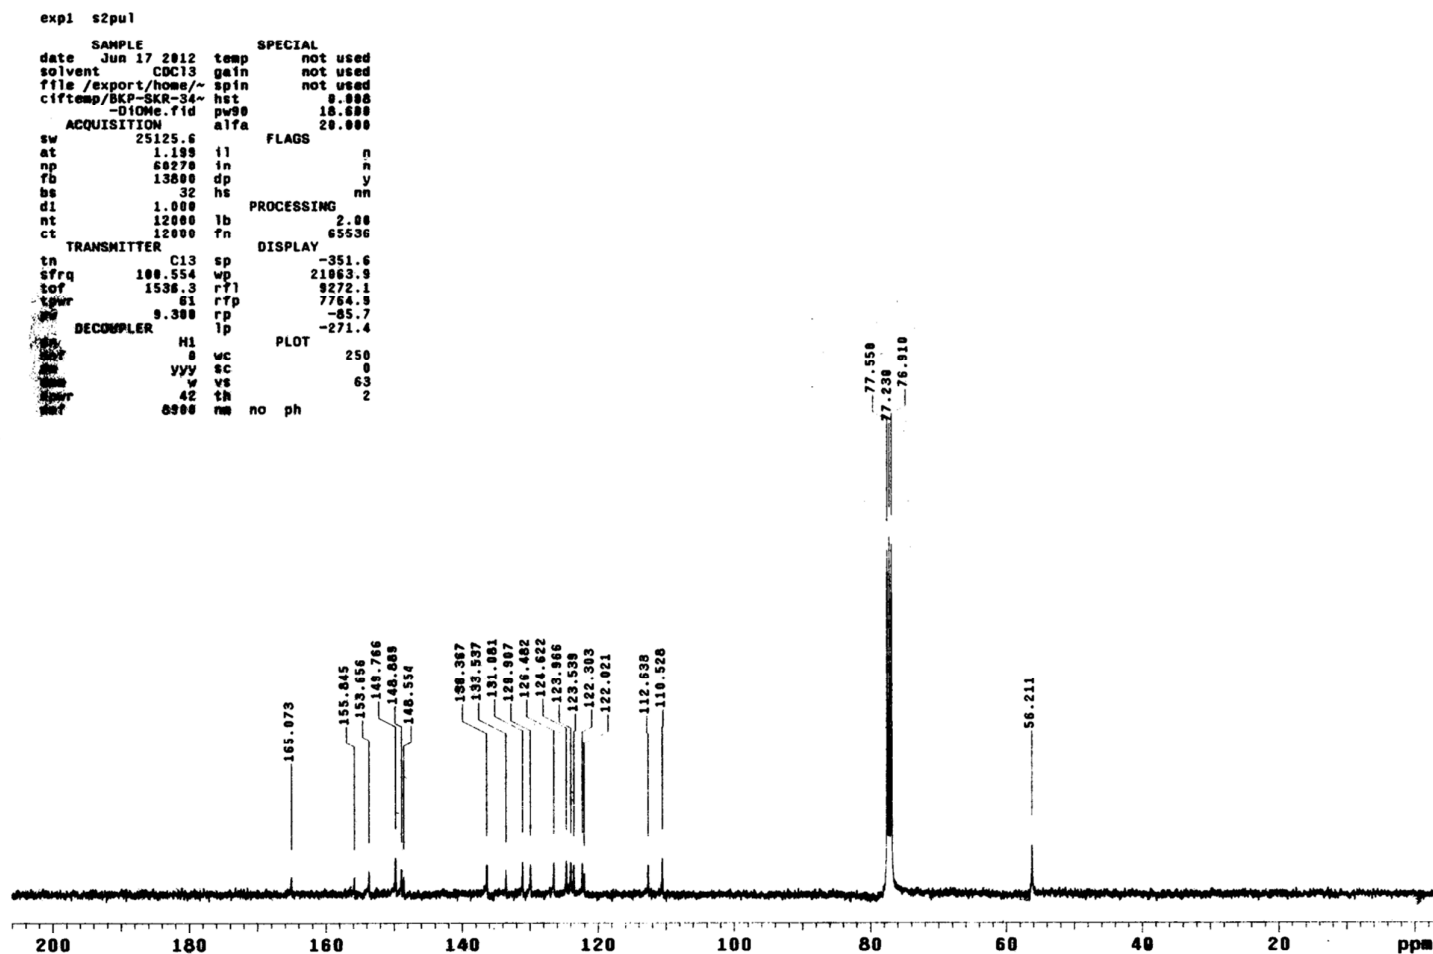

2-(Pyridin-2-yl)phenyl 1-naphthoate (1h):  $^1\text{H}$  NMR (600 MHz,  $\text{CDCl}_3$ )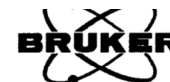

Current Data Parameters  
NAME SKR\_312\_1H  
EXPNO 1  
PROCNO 1

F2 - Acquisition Parameters  
Date\_ 20131025  
Time 13.01  
INSTRUM spect  
PROBHD 5 mm PABBO BB/  
PULPROG zg30  
TD 32768  
SOLVENT  $\text{CDCl}_3$   
NS 16  
DS 2  
SWH 12019.230 Hz  
FIDRES 0.366798 Hz  
AQ 1.3631488 sec  
RG 65.24  
DW 41.600 usec  
DE 6.50 usec  
TE 299.3 K  
D1 1.00000000 sec  
TD0 1

===== CHANNEL f1 =====  
SFO1 600.1737063 MHz  
NUC1  $^1\text{H}$   
P1 12.00 usec  
PLW1 21.00000000 W

F2 - Processing parameters  
SI 16384  
SF 600.1700149 MHz  
WDW EM  
SSB 0  
LB 0.30 Hz  
GB 0  
PC 1.00

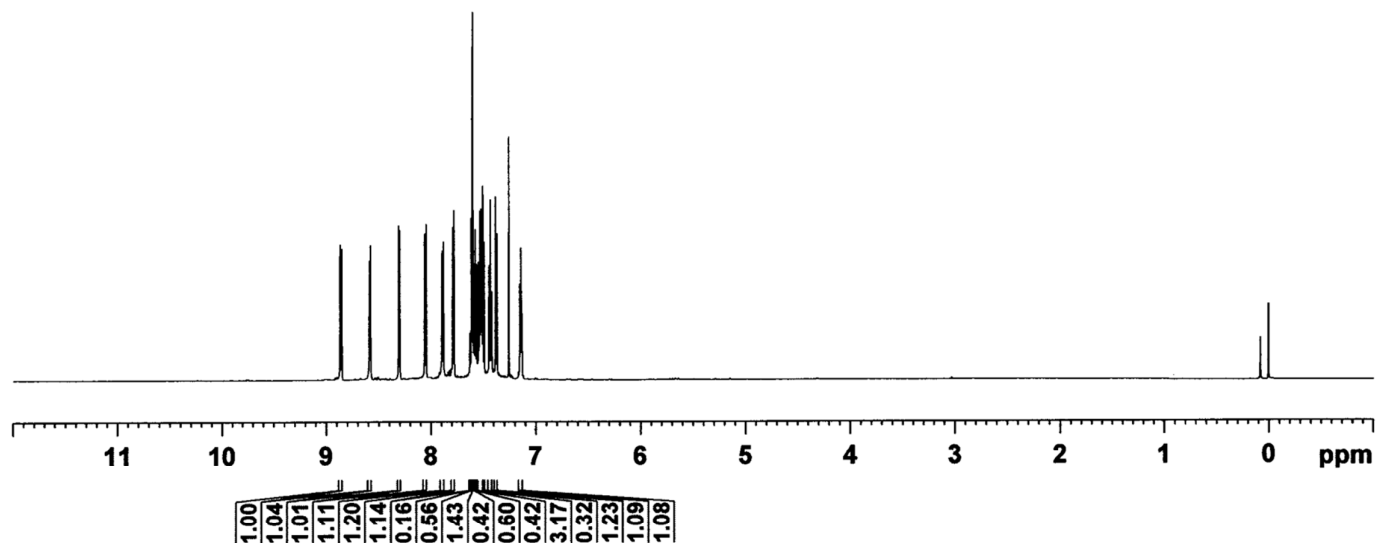

2-(Pyridin-2-yl)phenyl 1-naphthoate (1h):  $^{13}\text{C}$  NMR (150 MHz,  $\text{CDCl}_3$ )

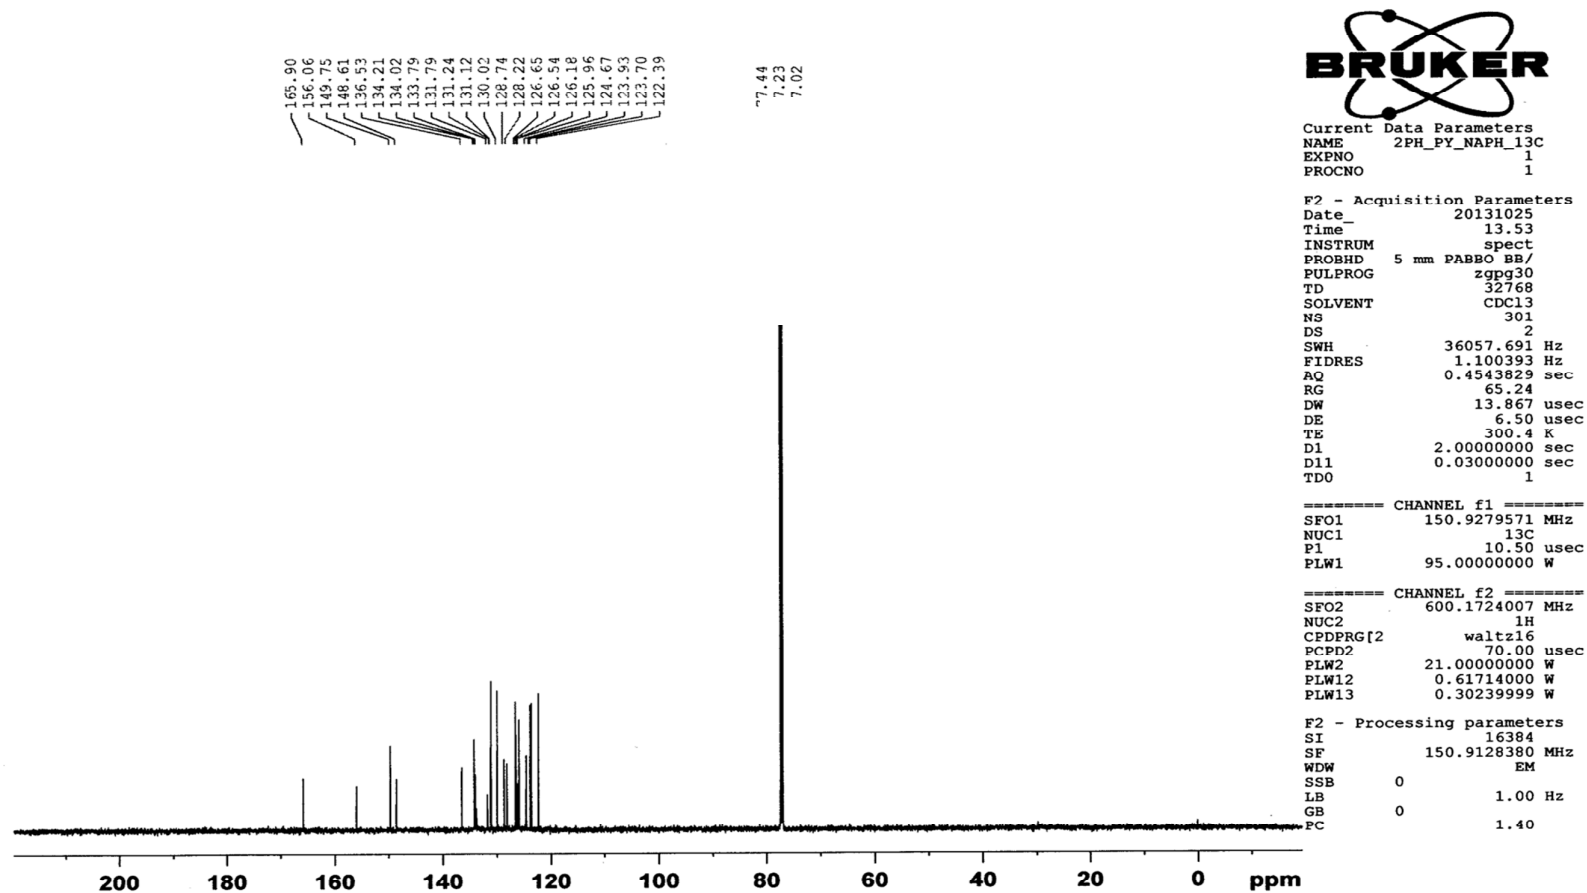

5-Methyl-2-(pyridin-2-yl)phenyl 3-methylbenzoate (2b'):  $^1\text{H}$  NMR (400 MHz,  $\text{CDCl}_3$ )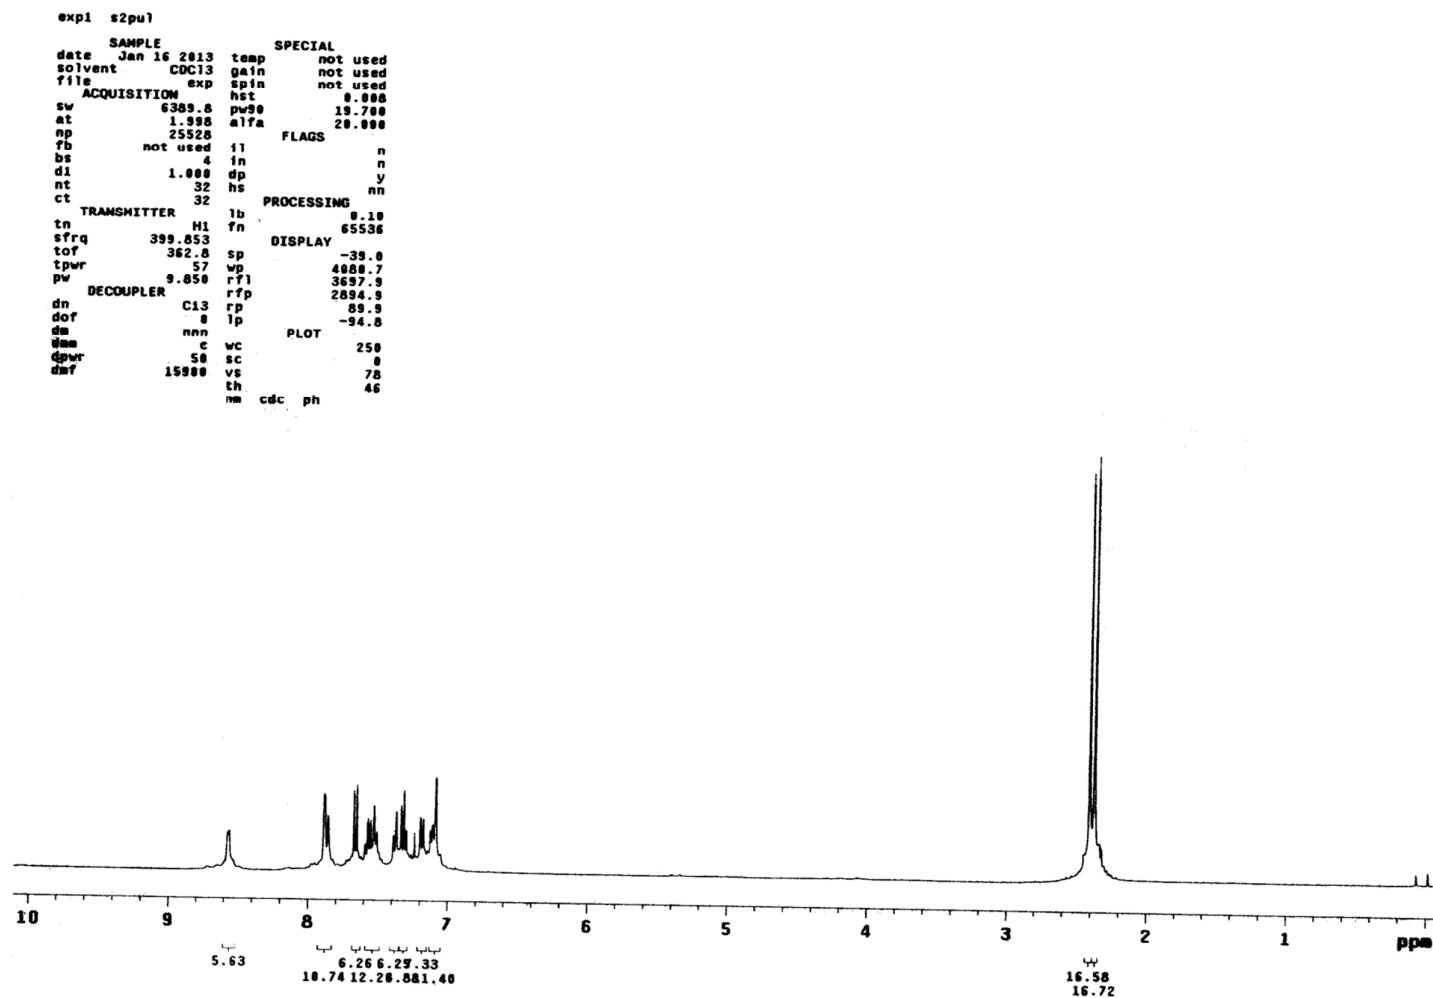

5-Methyl-2-(pyridin-2-yl)phenyl 3-methylbenzoate (2b):  $^{13}\text{C}$  NMR (100 MHz,  $\text{CDCl}_3$ )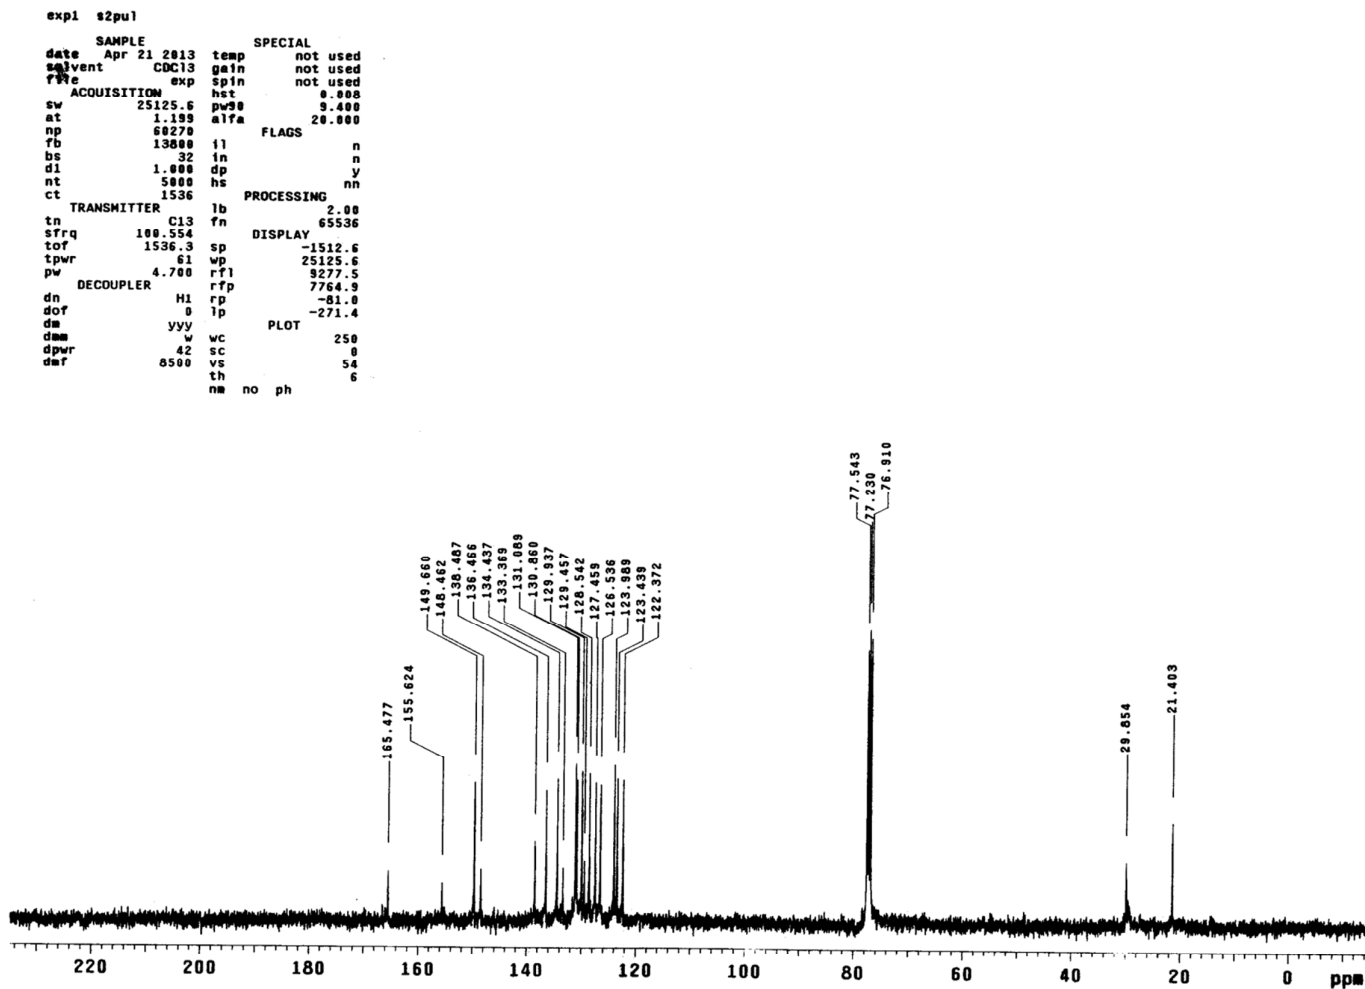

5-Methyl-2-(pyridine-2-yl)phenyl 4-(*tert*-butyl)benzoate (2c):  $^1\text{H}$  NMR (600 MHz,  $\text{CDCl}_3$ )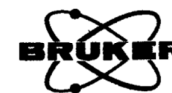

Current Data Parameters  
NAME skr-2-33-1H  
EXPNO 1  
PROCNO 1

F2 - Acquisition Parameters  
Date 20131025  
Time 14.55  
INSTRUM spect  
PROBHD 5 mm PABBO BB/  
PULPROG zg30  
TD 32768  
SOLVENT  $\text{CDCl}_3$   
NS 16  
DS 2  
SWH 12019.230 Hz  
FIDRES 0.366798 Hz  
AQ 1.3631488 sec  
RG 80.22  
DW 41.600 usec  
DE 6.50 usec  
TE 299.4 K  
D1 1.00000000 sec  
TD0 1

CHANNEL f1  
SFO1 600.1737063 MHz  
NUC1  $^1\text{H}$   
P1 12.00 usec  
PLW1 21.00000000 W

F2 - Processing parameters  
SI 16384  
SF 600.1700149 MHz  
WDW EM  
SSB 0  
LB 0.30 Hz  
GB 0  
PC 1.00

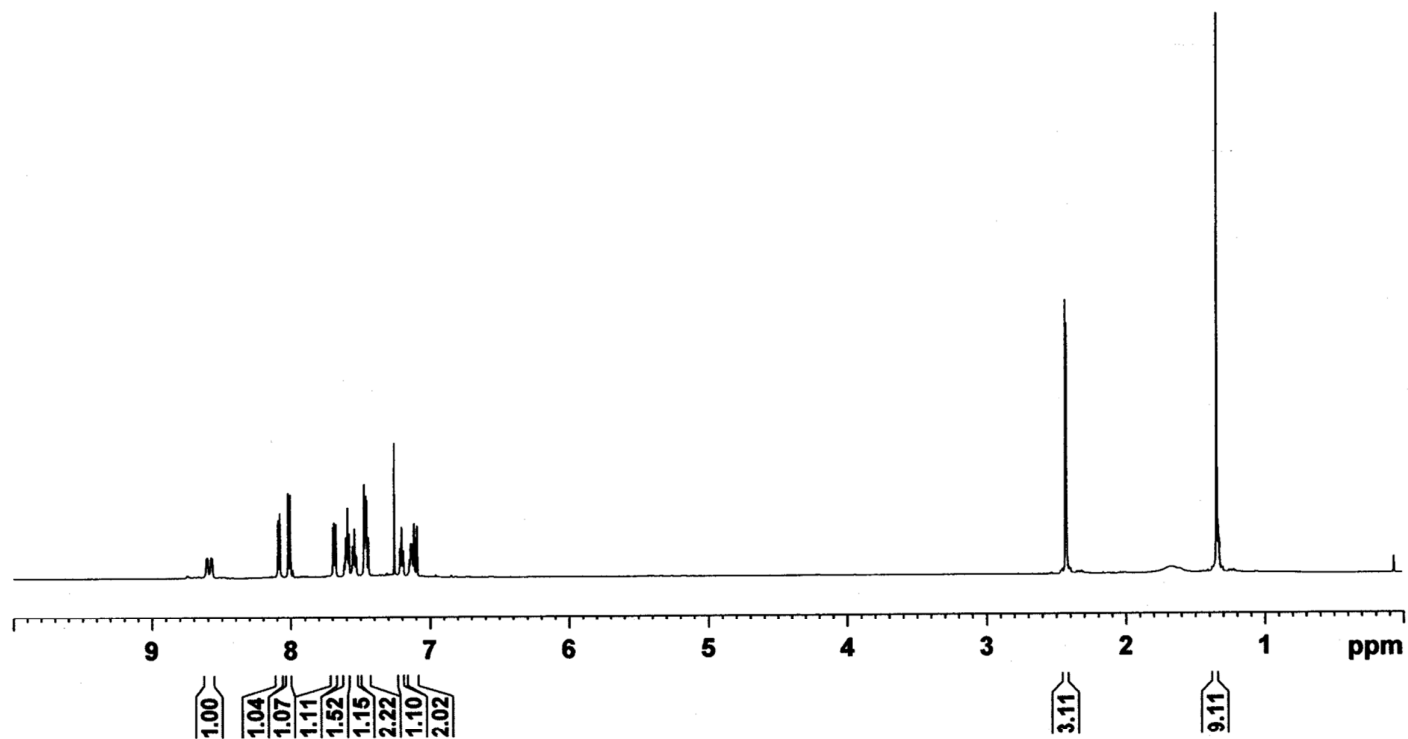

5-Methyl-2-(pyridine-2-yl)phenyl 4-(*tert*-butyl)benzoate (2c):  $^{13}\text{C}$  NMR (150 MHz,  $\text{CDCl}_3$ )

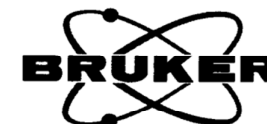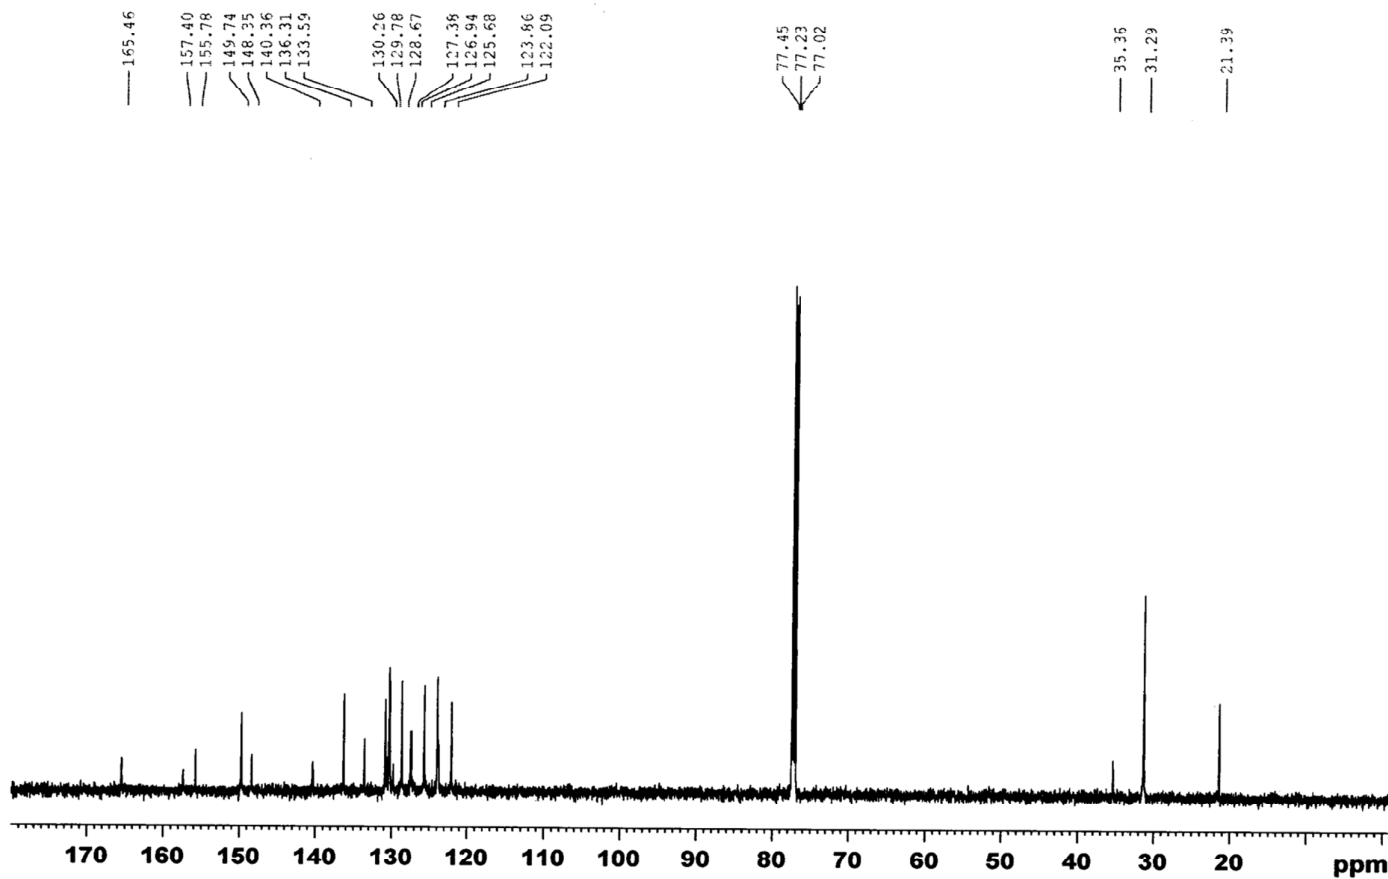

Current Data Parameters  
NAME TET\_BUTYL\_13C  
EXPNO 1  
PROCNO 1

F2 - Acquisition Parameters  
Date\_ 20131017  
Time 13.23  
INSTRUM spect  
PROBHD 5 mm PABBO BB/  
PULPROG zgpg30  
TD 32768  
SOLVENT CDCl3  
NS 301  
DS 2  
SWH 36057.691 Hz  
FIDRES 1.100393 Hz  
AQ 0.4543829 sec  
RG 65.24  
DW 13.867 usec  
DE 6.50 usec  
TE 299.9 K  
D1 2.0000000 sec  
D11 0.0300000 sec  
TD0 1

===== CHANNEL f1 =====  
SFO1 150.9279571 MHz  
NUC1 13C  
P1 10.50 usec  
PLW1 95.0000000 W

===== CHANNEL f2 =====  
SFO2 600.1724007 MHz  
NUC2 1H  
CPDPRG{2} waltz16  
PCPD2 70.00 usec  
PLW2 21.0000000 W  
PLW12 0.61714000 W  
PLW13 0.30239999 W

F2 - Processing parameters  
SI 16384  
SF 150.9128379 MHz  
WDW EM  
SSB 0  
LB 1.00 Hz  
GB 0  
FC 1.40

5-Methyl-2-(pyridine-2-yl)phenyl 3,5dimethylbenzoate (2d'):  $^1\text{H}$  NMR (400 MHz,  $\text{CDCl}_3$ )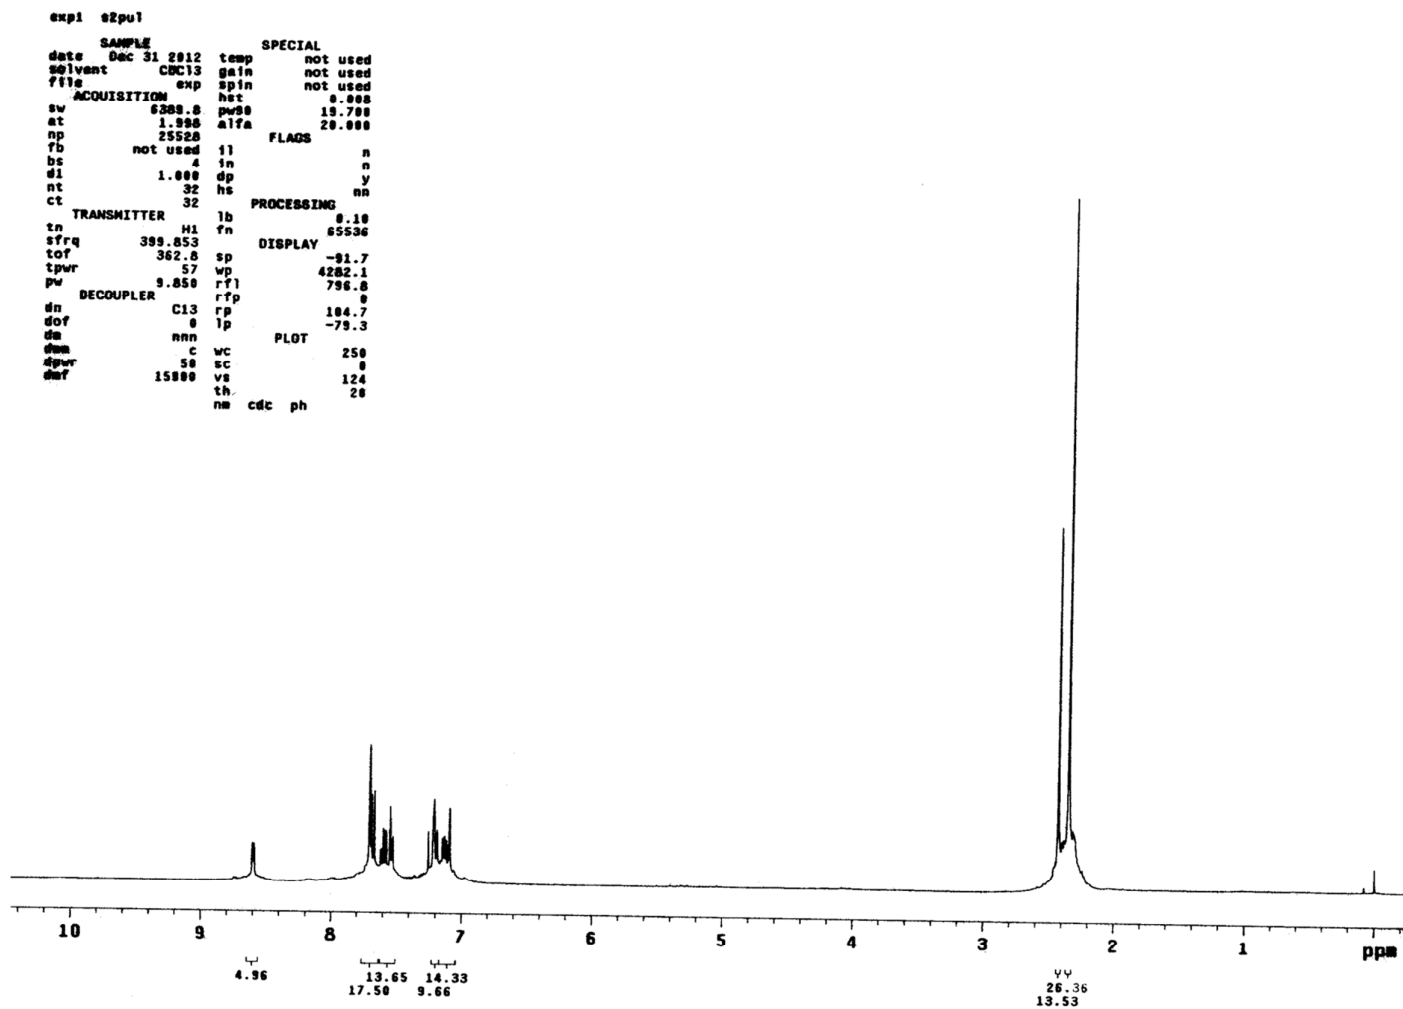



5-Methyl-2-(pyridine-2-yl)phenyl 3,5dimethylbenzoate (2d):  $^{13}\text{C}$  NMR (100 MHz,  $\text{CDCl}_3$ )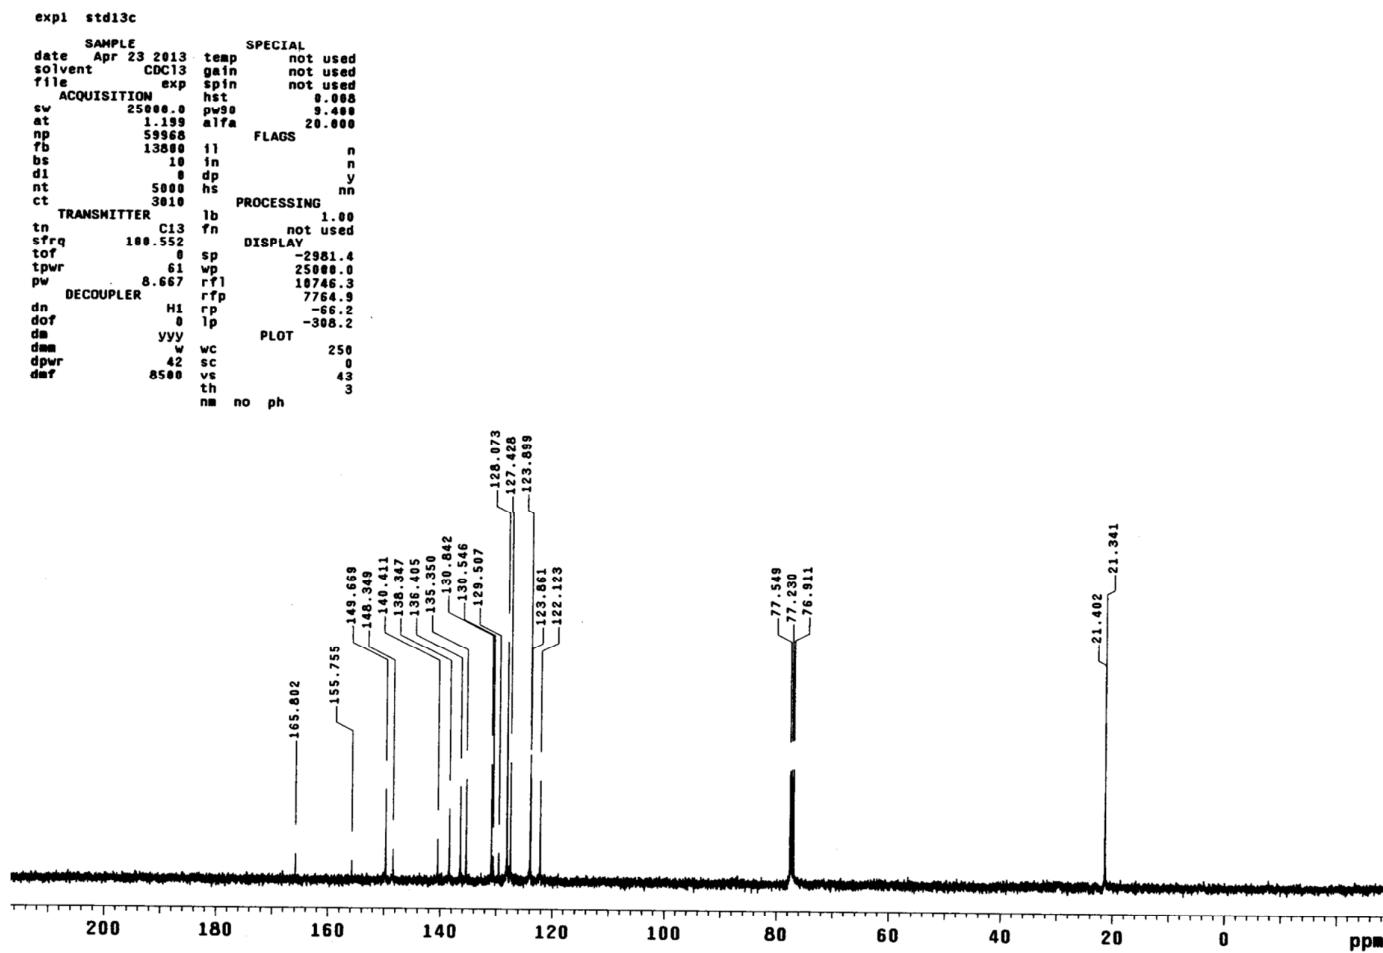

5-Methyl-2-(pyridine-2-yl)phenyl 4-bromobenzoate (2g):  $^1\text{H}$  NMR (400 MHz,  $\text{CDCl}_3$ )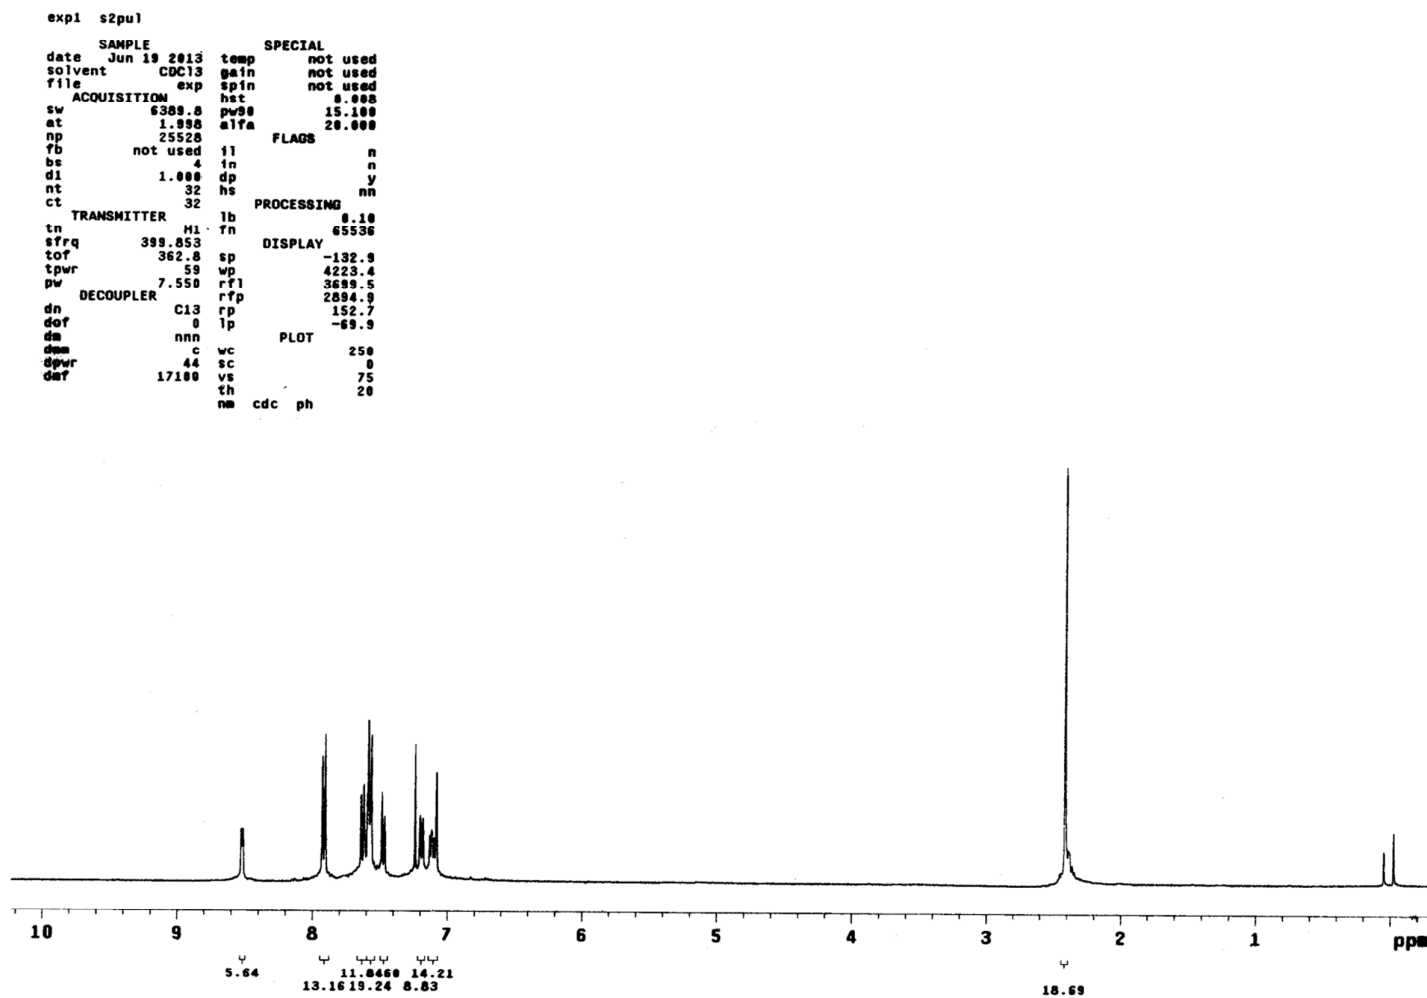

5-Methyl-2-(pyridine-2-yl)phenyl 4-bromobenzoate (2g):  $^{13}\text{C}$  NMR (100 MHz,  $\text{CDCl}_3$ )

```
exp1 s2pu1
SAMPLE
date Jun 24 2013 temp not used
solvent CDCl3 gain not used
file exp spin not used
ACQUISITION
sw 25125.6 hst 0.000
at 1.189 pw90 9.400
np 60270 alfa 20.000
fb 13800 fl
bs 32 in n
d1 1.000 dp y
nt 5000 hs nn
ct 1024
TRANSMITTER
tn C13 lb 2.00
sfrq 100.554 fn 65536
tof 1536.3 sp -1508.7
tpwr 61 wp 25125.6
pw 4.700 rfl 9273.6
DECOUPLER
dn M1 rfp 7764.9
dot 0 rp -56.3
dm YVY PLOT
dss w wc 250
dpr 42 sc 0
dat 8500 vs 25
th 3
na no ph
```

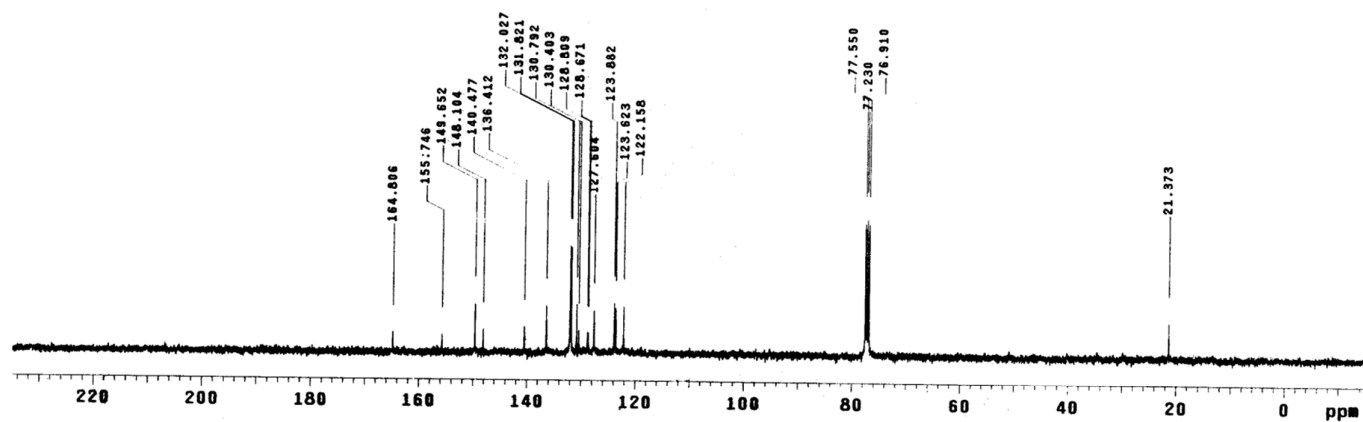

**2,2,6,6-Tetramethylpiperidin-1-yl benzoate (H):  $^1\text{H}$  NMR (600 MHz,  $\text{CDCl}_3$ )**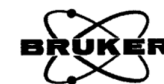

Current Data Parameters  
NAME SG-TEM-US-1H  
EXPNO 1  
PROCNO 1

F2 - Acquisition Parameters  
Date\_ 20131109  
Time 10.51  
INSTRUM spect  
PROBHD 5 mm PABBO BB/  
PULPROG zg30  
TD 32768  
SOLVENT  $\text{CDCl}_3$   
NS 16  
DS 2  
SWH 12019.230 Hz  
FIDRES 0.366798 Hz  
AQ 1.3631488 sec  
RG 34.76  
DW 41.600 usec  
DE 6.50 usec  
TE 298.9 K  
D1 1.00000000 sec  
TD0 1

===== CHANNEL f1 =====  
SFO1 600.1737063 MHz  
NUC1  $^1\text{H}$   
P1 12.00 usec  
PLW1 21.00000000 W

F2 - Processing parameters  
SI 16384  
SF 600.1700268 MHz  
WDW EM  
SSB 0  
LB 0.30 Hz  
GB 0  
PC 1.00

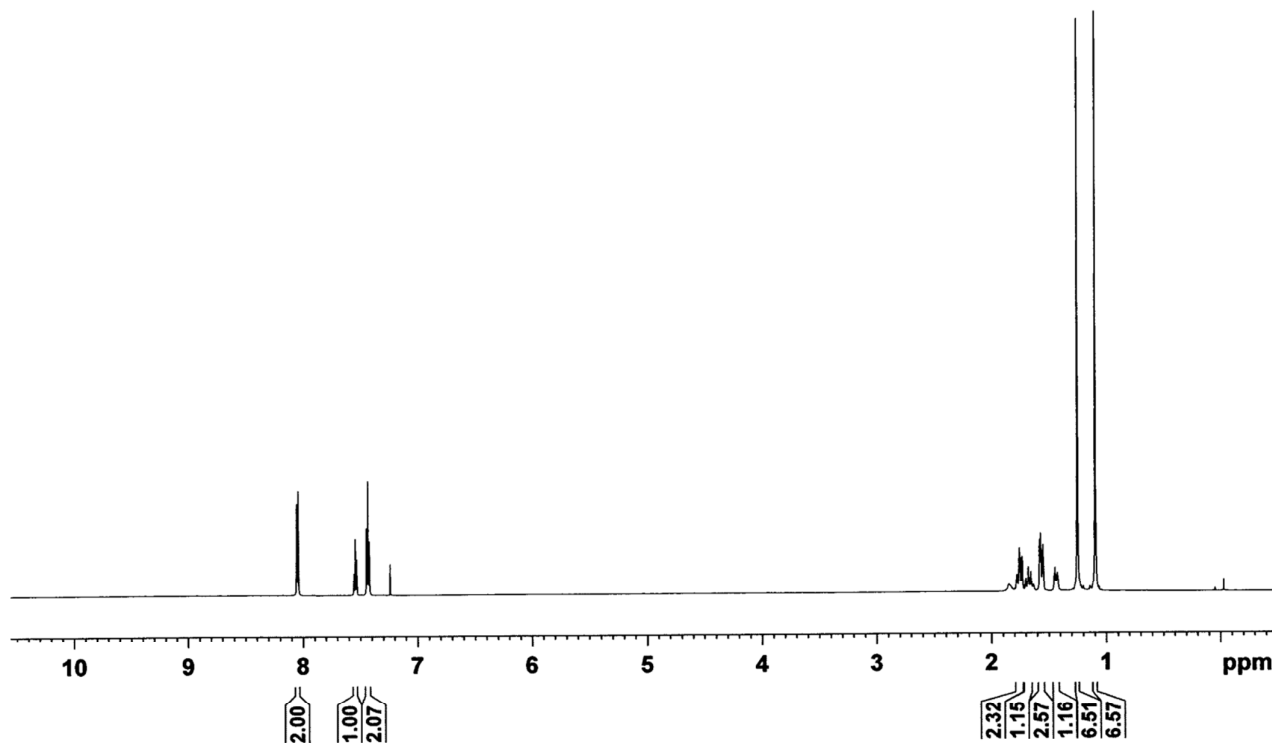

2,2,6,6-Tetramethylpiperidin-1-yl benzoate (H):  $^{13}\text{C}$  NMR (150 MHz,  $\text{CDCl}_3$ )

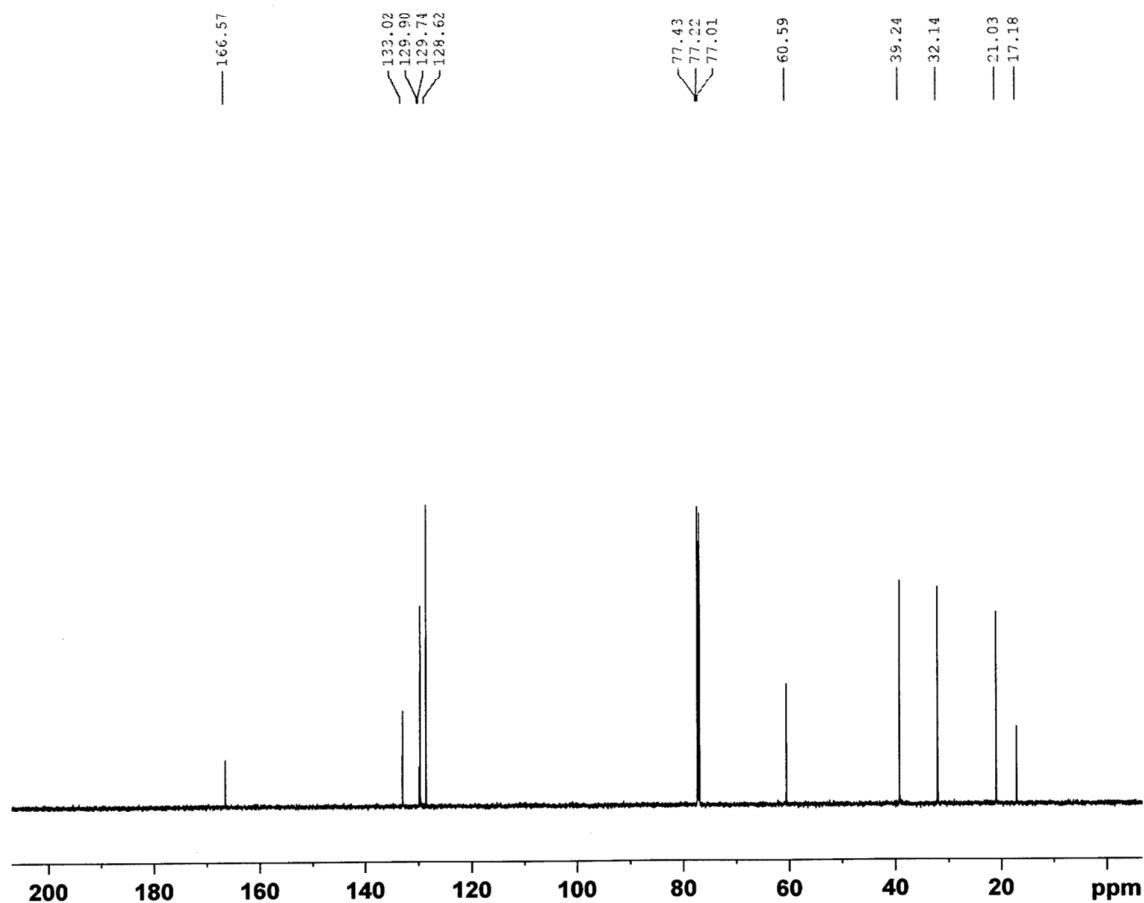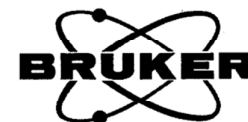

Current Data Parameters  
 NAME SC-TEM-US-13C  
 EXPNO 1  
 PROCNO 1

F2 - Acquisition Parameters  
 Date\_ 20131109  
 Time 10.59  
 INSTRUM spect  
 PROBHD 5 mm PABBO BB/  
 PULPROG zgpg30  
 TD 32768  
 SOLVENT  $\text{CDCl}_3$   
 NS 65  
 DS 2  
 SWH 36057.691 Hz  
 FIDRES 1.100393 Hz  
 AQ 0.4543829 sec  
 RG 65.24  
 DW 13.867 usec  
 DE 6.50 usec  
 TE 299.3 K  
 D1 2.00000000 sec  
 D11 0.03000000 sec  
 TD0 1

===== CHANNEL f1 =====  
 SFO1 150.9279571 MHz  
 NUC1  $^{13}\text{C}$   
 P1 10.50 usec  
 PLW1 95.00000000 W

===== CHANNEL f2 =====  
 SFO2 600.1724007 MHz  
 NUC2  $^1\text{H}$   
 CPDPRG[2] waltz16  
 PCPD2 70.00 usec  
 PLW2 21.00000000 W  
 PLW12 0.61714000 W  
 PLW13 0.30239999 W

F2 - Processing parameters  
 SI 16384  
 SF 150.9128415 MHz  
 WDW EM  
 SSB 0  
 LB 1.00 Hz  
 GB 0  
 PC 1.40
